# Supplementary material for: Construction of unique SCF3-containing building blocks via allylic alkylation of Morita–Baylis–Hillman adducts
Source: Royal Society of Chemistry journal article supplement (doi:10.1039/d0ob00104j), 2020-01-01

*Supporting Information for*

**Construction of Unique SCF<sub>3</sub>-Containing Building Blocks via Allylic Alkylation of Morita-Baylis-Hillman Adducts**

Priyanka Halder,<sup>a,b</sup> Mahesh D. Pol,<sup>a</sup> Milind M. Ahire,<sup>a,b</sup> and Santosh B. Mhaske\*<sup>a,b</sup>

<sup>a</sup>Division of Organic Chemistry, CSIR-National Chemical Laboratory, Pune - 411008, India

<sup>b</sup>Academy of Scientific and Innovative Research (AcSIR), Ghaziabad - 201002, India

| Sr. No. | Index                                                                            | Page No. |
|---------|----------------------------------------------------------------------------------|----------|
| 1.      | Copies of <sup>1</sup> H NMR, <sup>13</sup> C NMR Spectra, and HRMS Chromatogram | S2-S58   |

**Structures of the catalysts used in Table 2:**

| Sr. No. | Base                    | Structure                                                                           | Sr. No. | Base                    | Structure                                                                             |
|---------|-------------------------|-------------------------------------------------------------------------------------|---------|-------------------------|---------------------------------------------------------------------------------------|
| 1.      | Quinine                 | 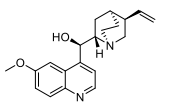 | 5.      | (DHQD) <sub>2</sub> PYR |  |
| 2.      | Cinchonidine            |  | 6.      | Thiourea cat. A         |  |
| 3.      | (DHQ) <sub>2</sub> AQN  |  | 7.      | Thiourea cat. B         |  |
| 4.      | (DHQ) <sub>2</sub> PHAL |  | 8.      | β-isocupreidine         |  |

Copies of  $^1\text{H}$  NMR,  $^{13}\text{C}$  NMR Spectra and HRMS Chromatogram:

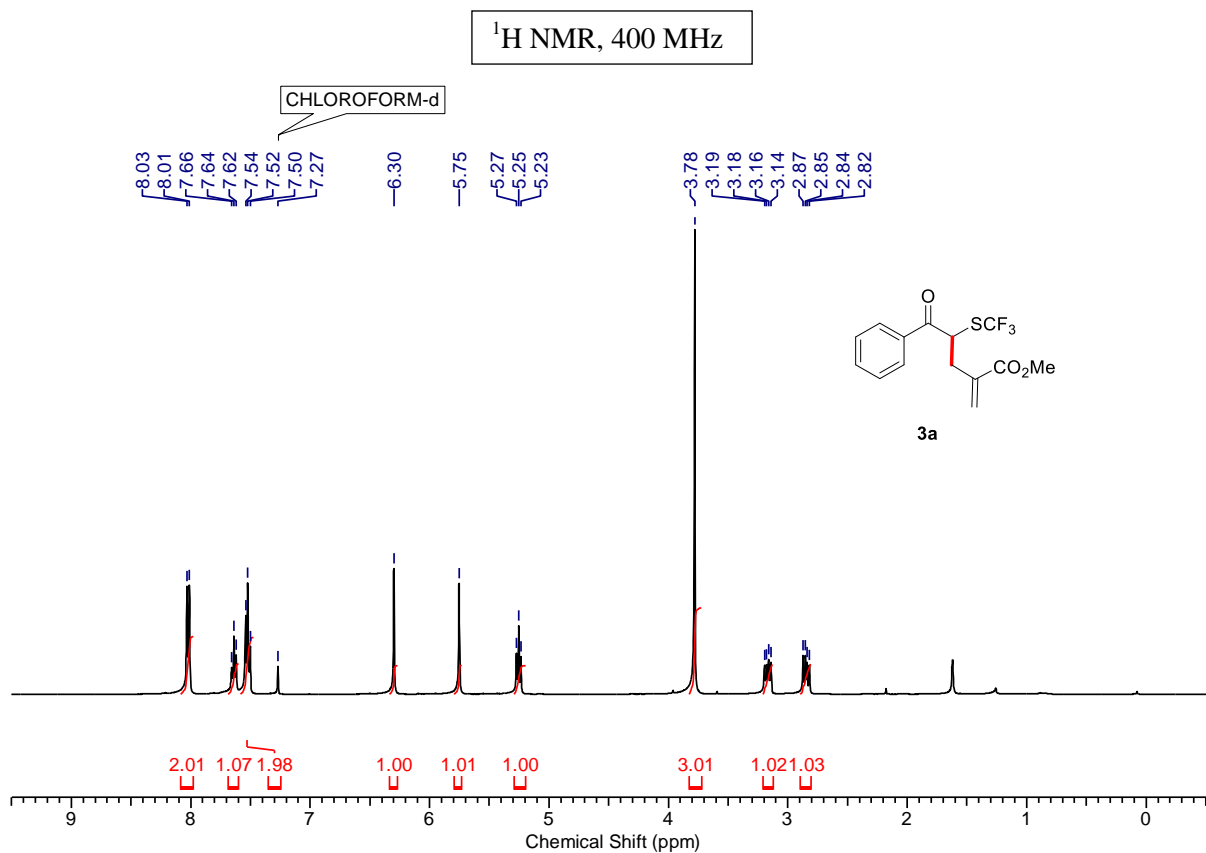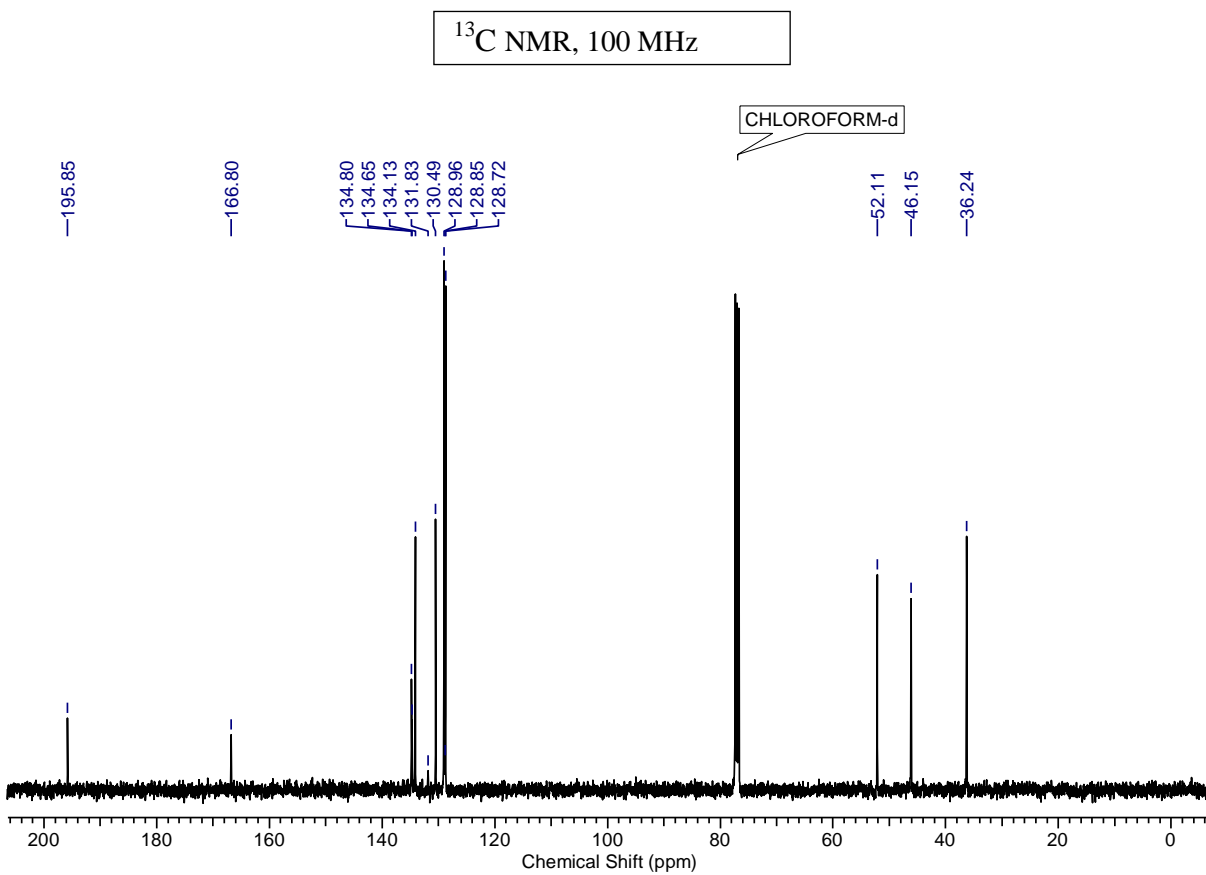

ESI-HRMS

BHA-3 #314 RT: 1.40 AV: 1 NL: 1.22E9  
T: FTMS + p ESI Full ms [100.0000-1500.0000]

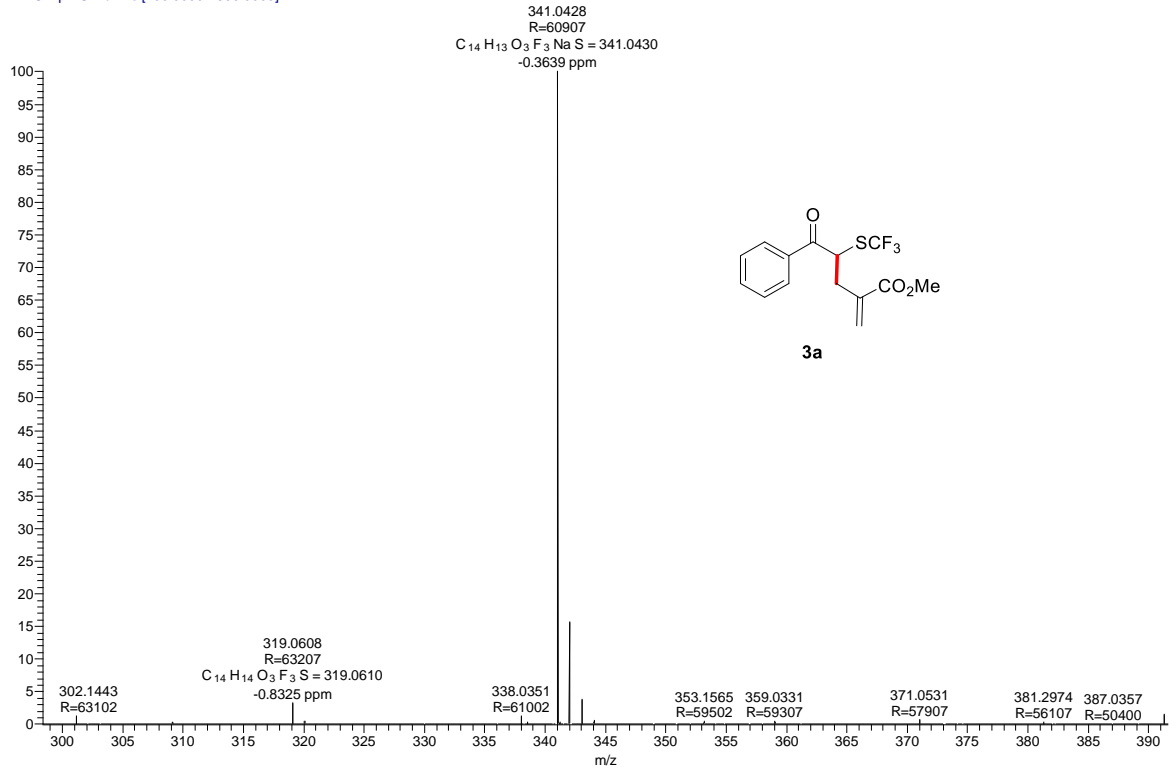

<sup>1</sup>H NMR, 400 MHz

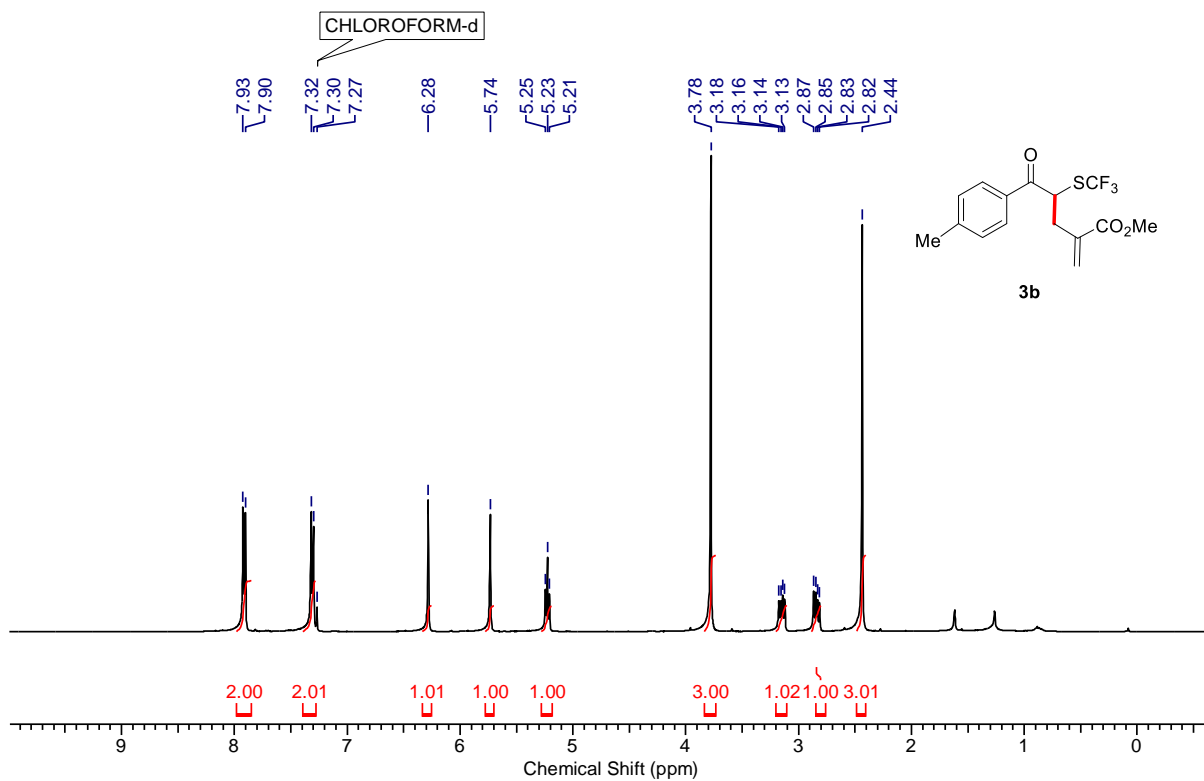

<sup>13</sup>C NMR, 100 MHz

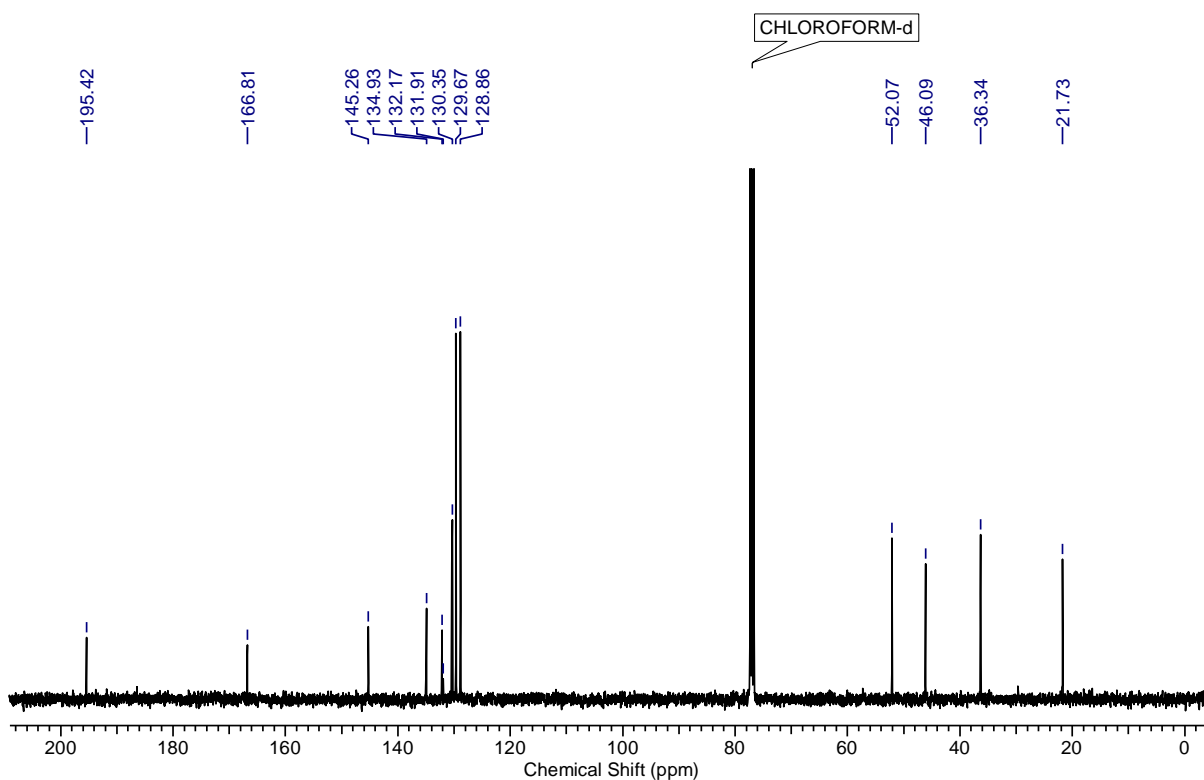

ESI-HRMS

BHA-7\_180516154237 #290 RT: 1.29 AV: 1 NL: 2.81E9  
T: FTMS + p ESIFull ms [100.0000-1500.0000]

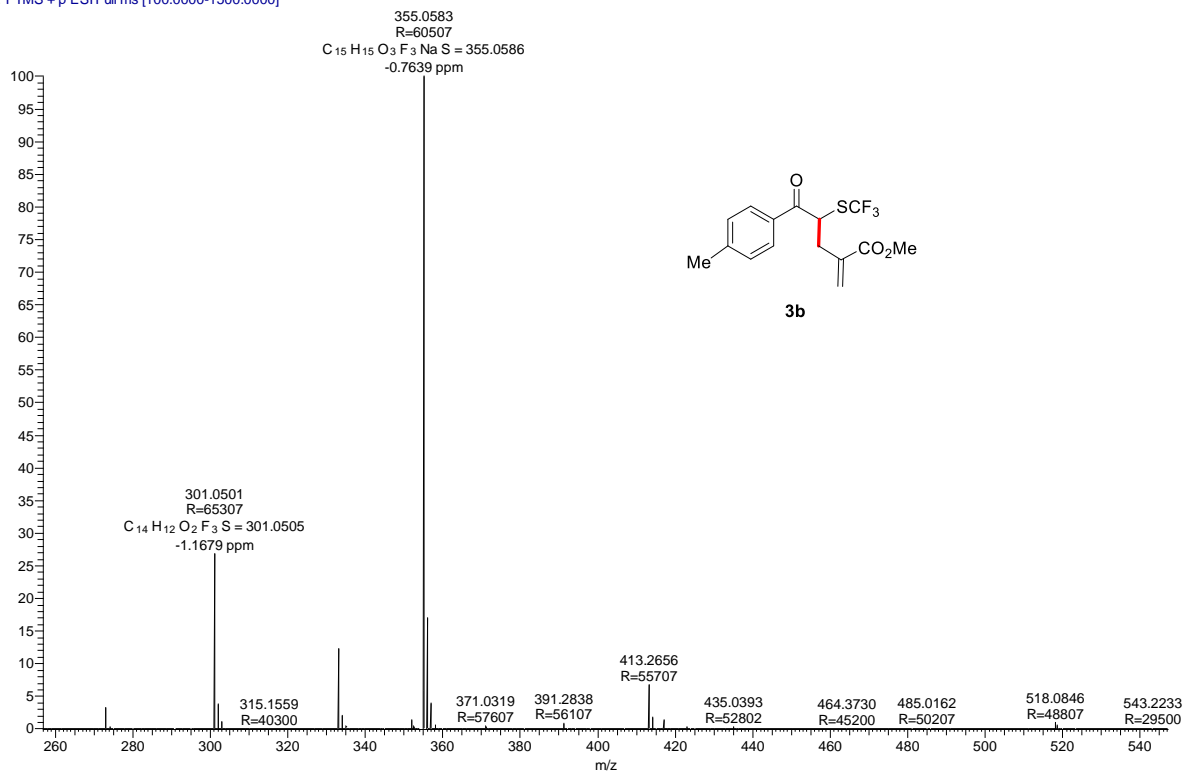

<sup>1</sup>H NMR, 400 MHz

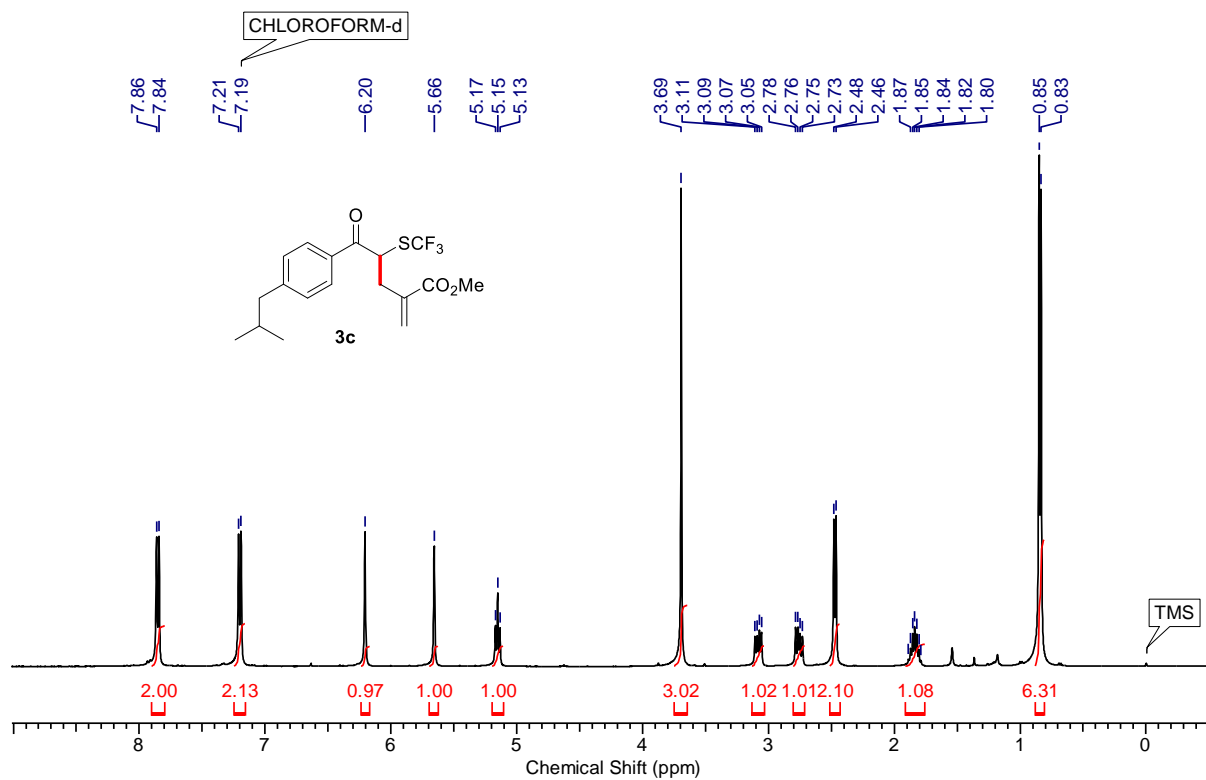

<sup>13</sup>C NMR, 100 MHz

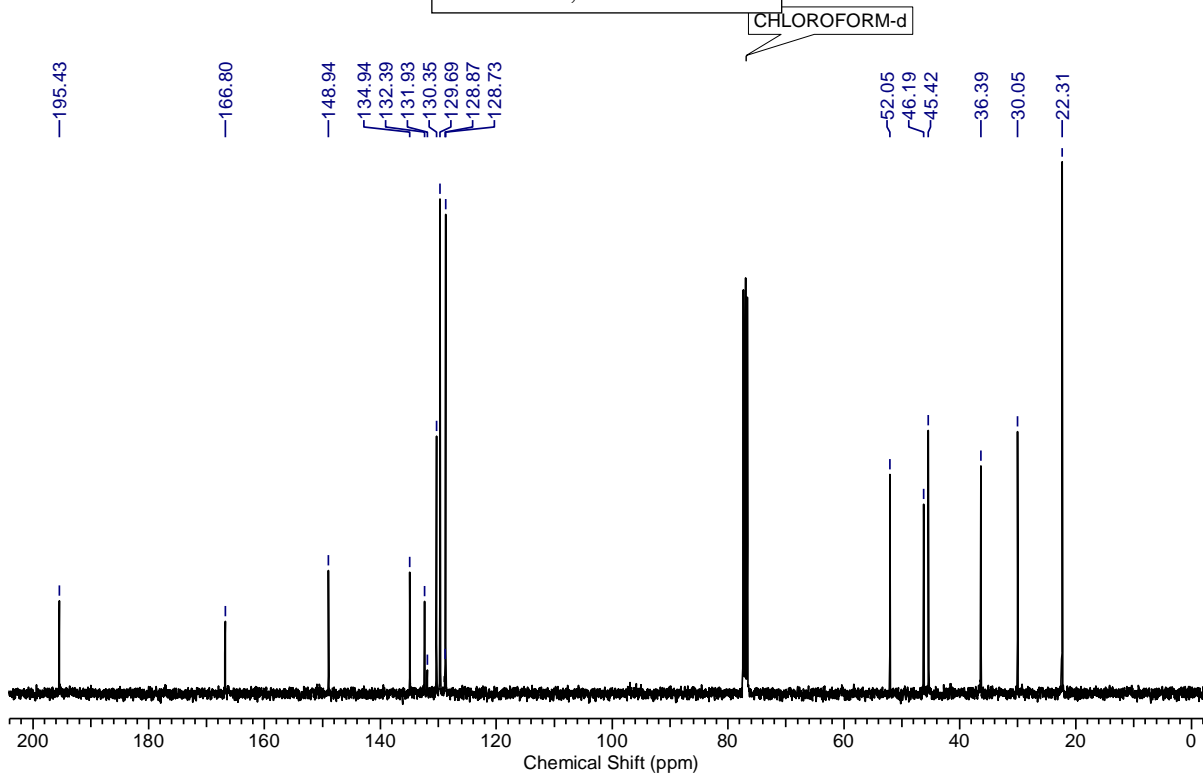

ESI-HRMS

BHA-8 #325 RT: 1.45 AV: 1 NL: 6.37E8  
T: FTMS + p ESI Full ms [100.0000-1500.0000]

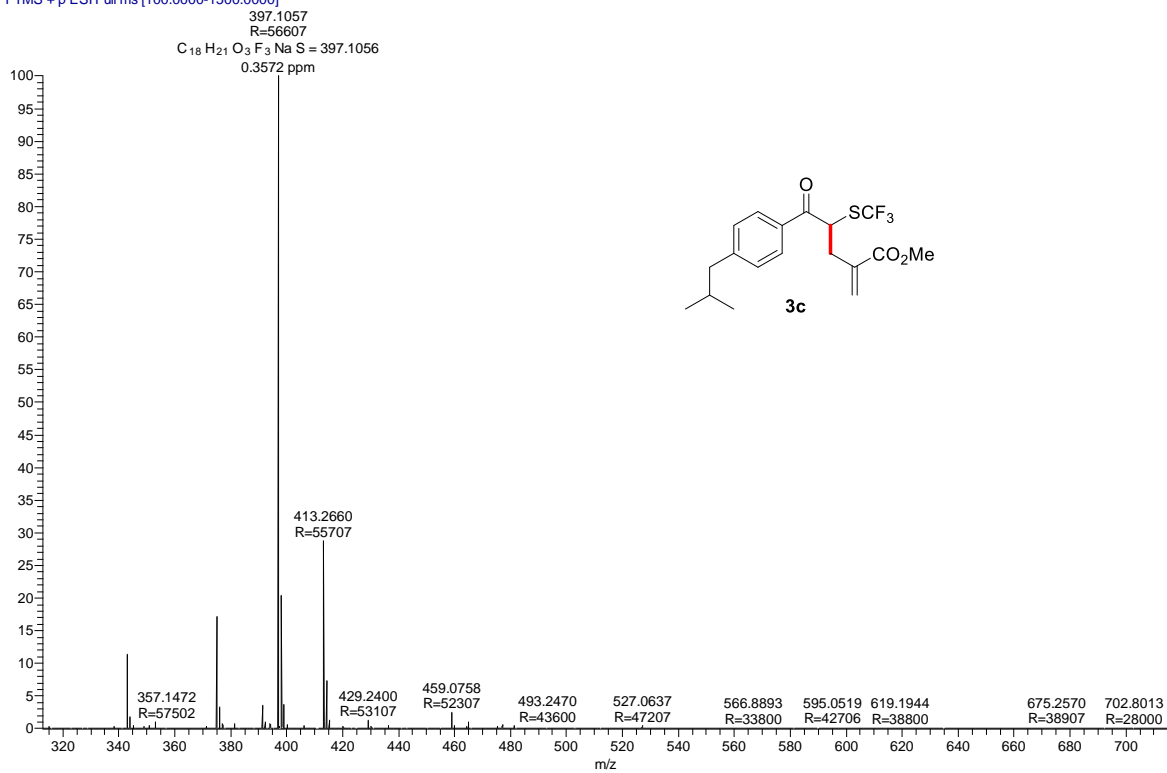

<sup>1</sup>H NMR, 400 MHz

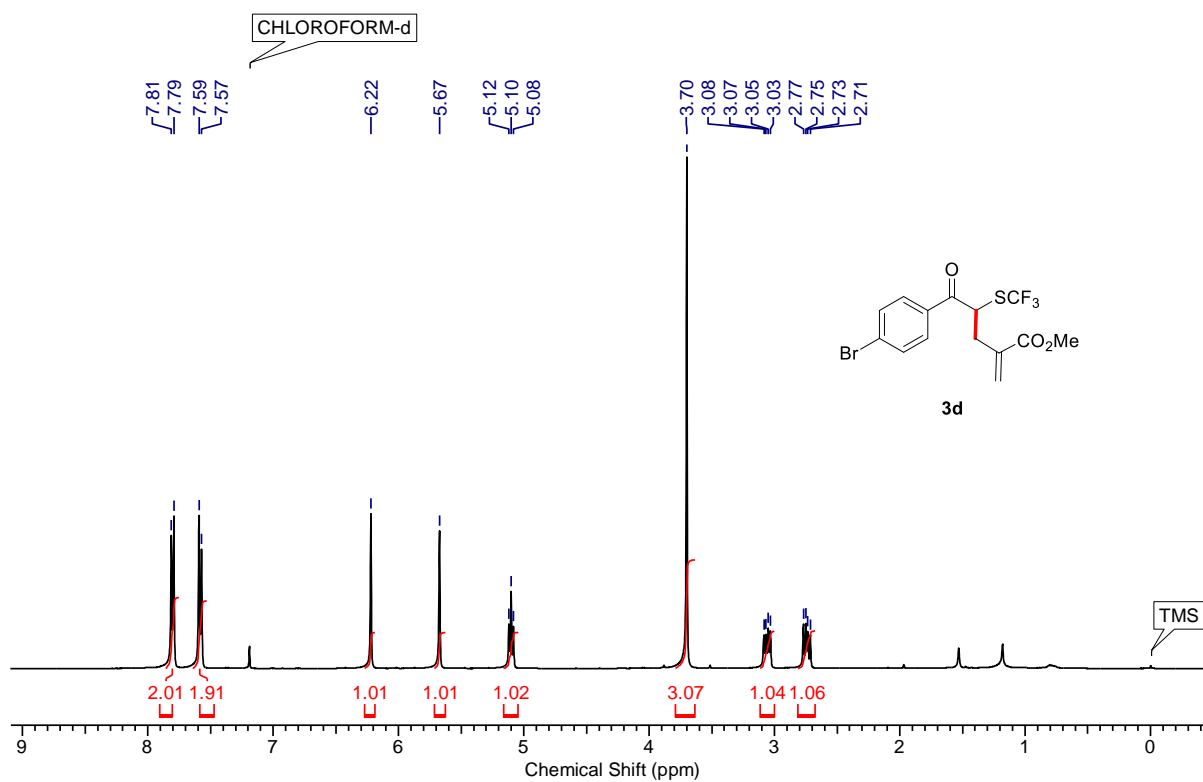

<sup>13</sup>C NMR, 100 MHz

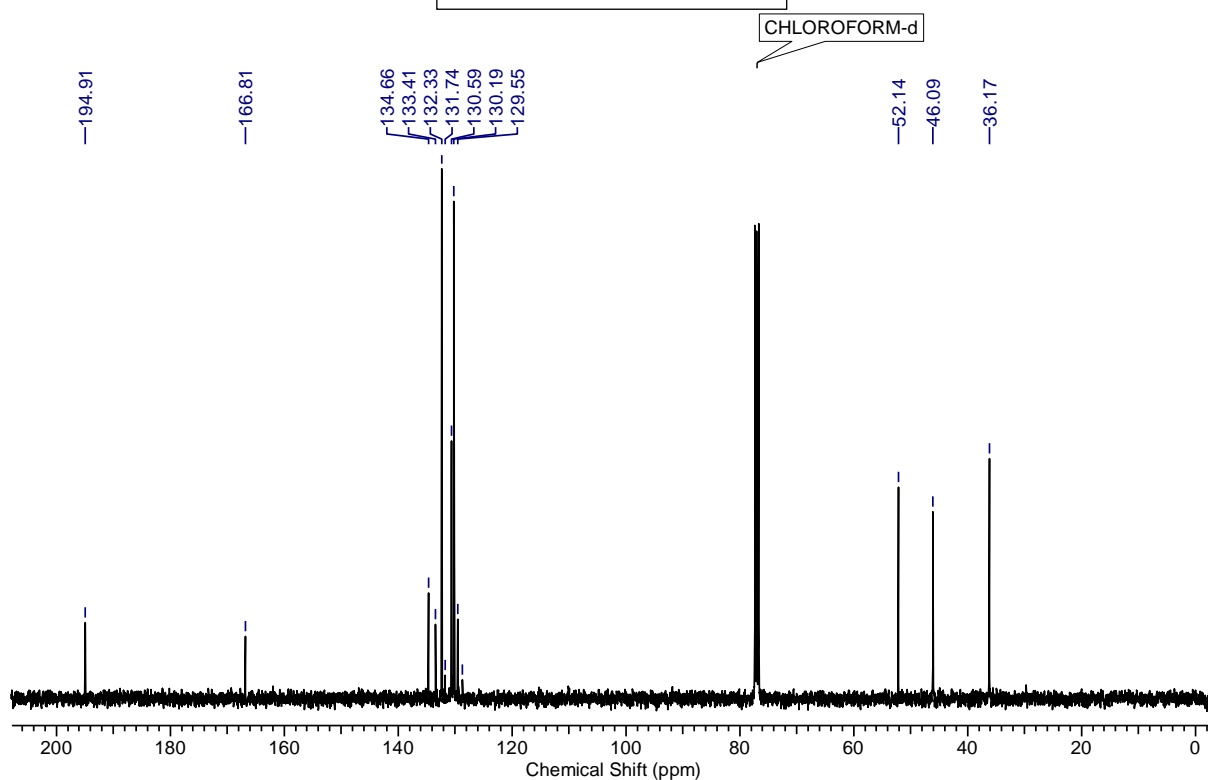



ESI-HRMS

BHA-6\_180516153828 #305 RT: 1.36 AV: 1 NL: 4.61E8  
T: FTMS + p ESI Full ms [100.0000-1500.0000]

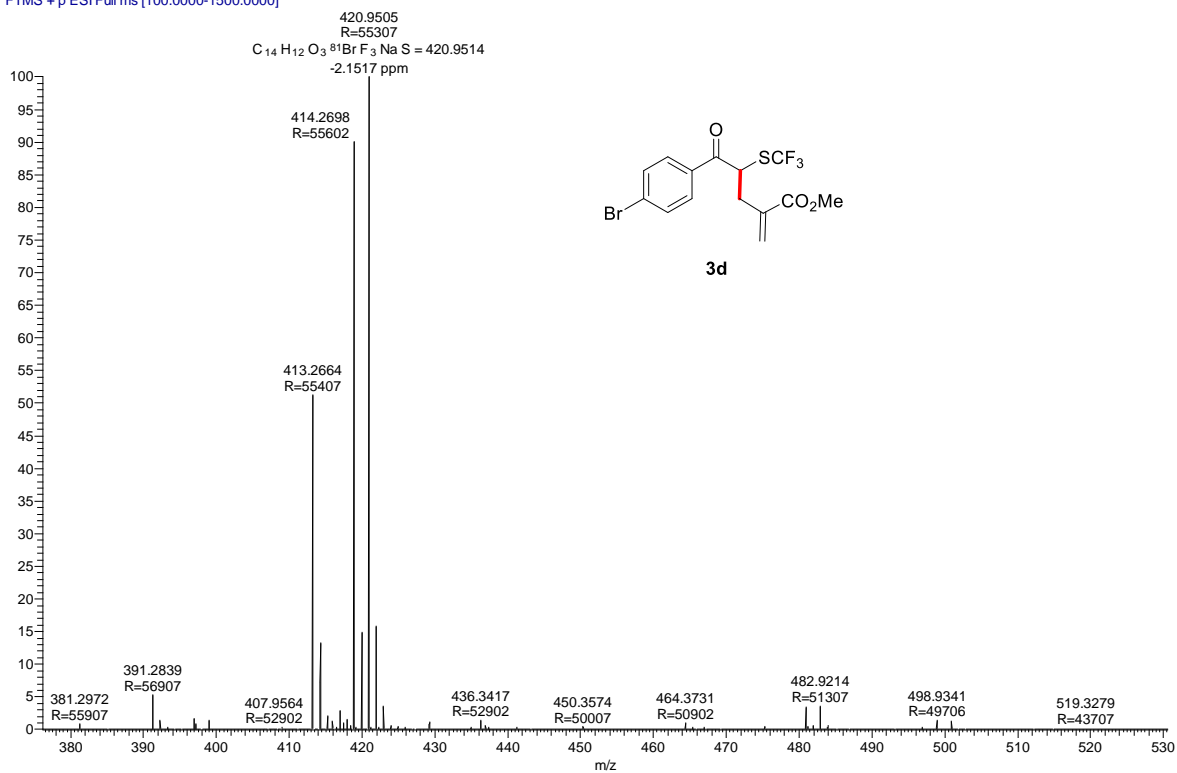

<sup>1</sup>H NMR, 400 MHz

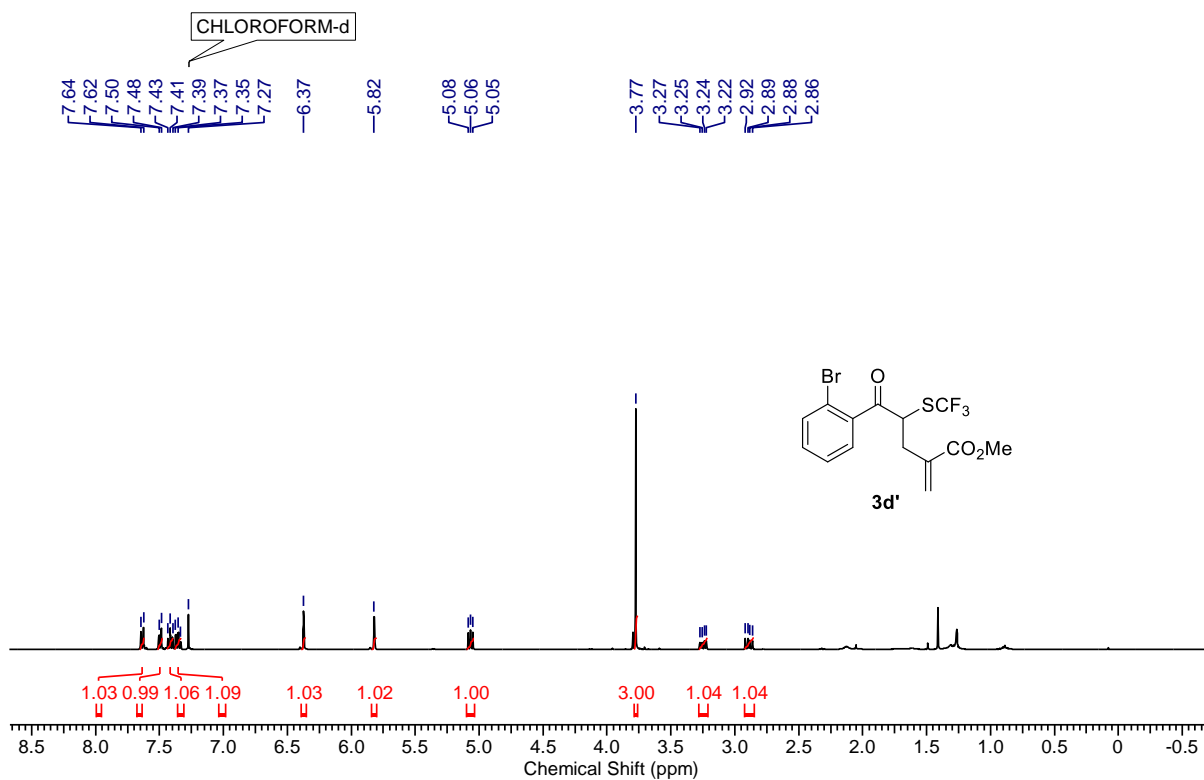

<sup>13</sup>C NMR, 100 MHz

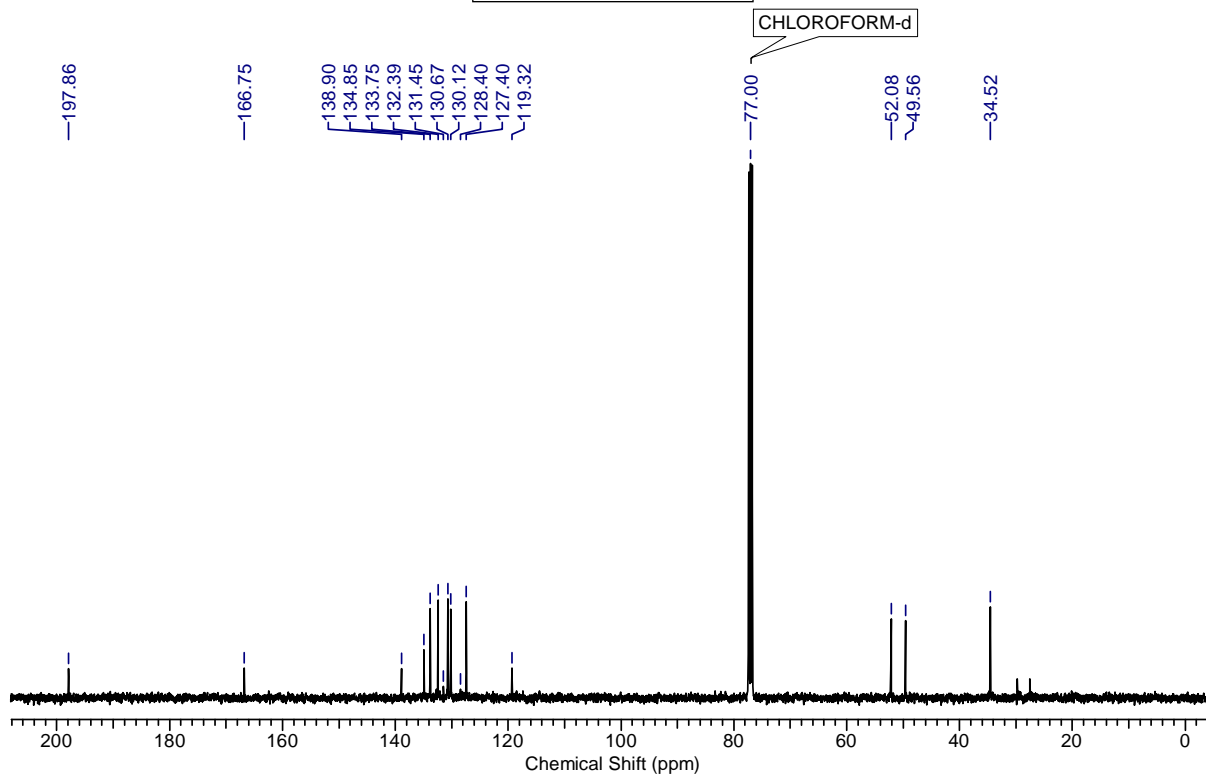

# ESI-HRMS

MP\_01 #296 RT: 1.71 AV: 1 NL: 1.44E8  
T: FTMS + p ESI Full ms [100.0000-1500.0000]

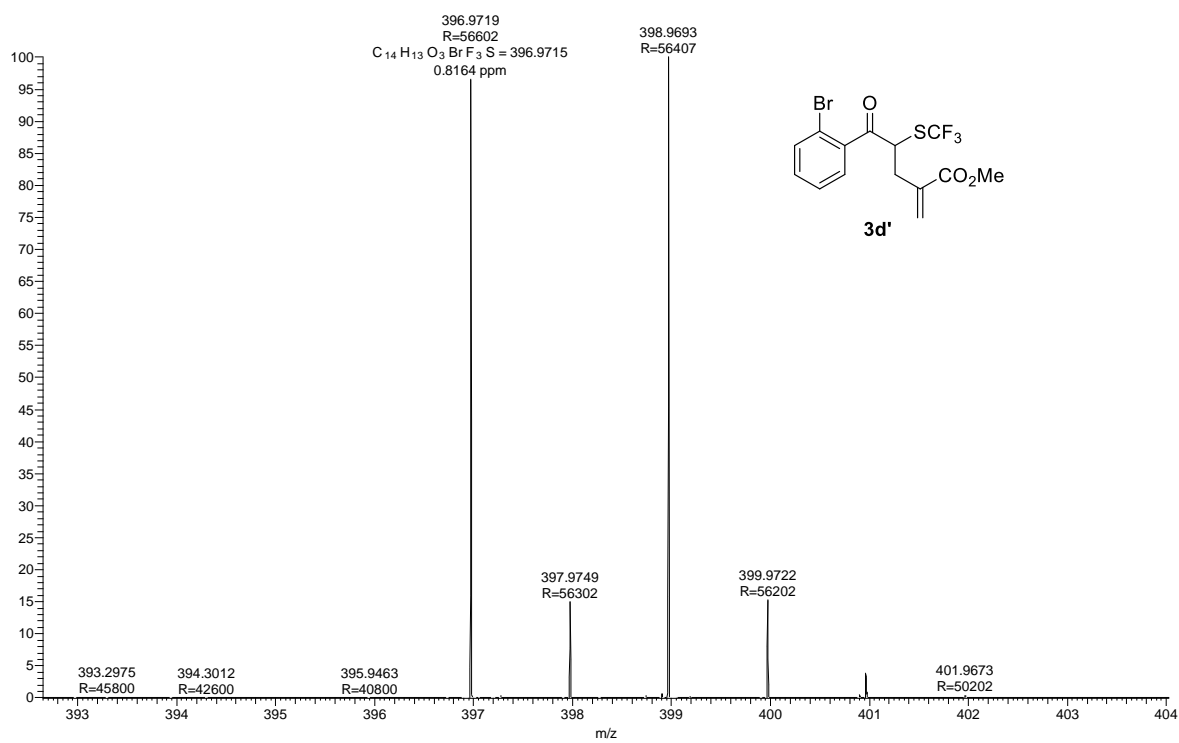

<sup>1</sup>H NMR, 200 MHz

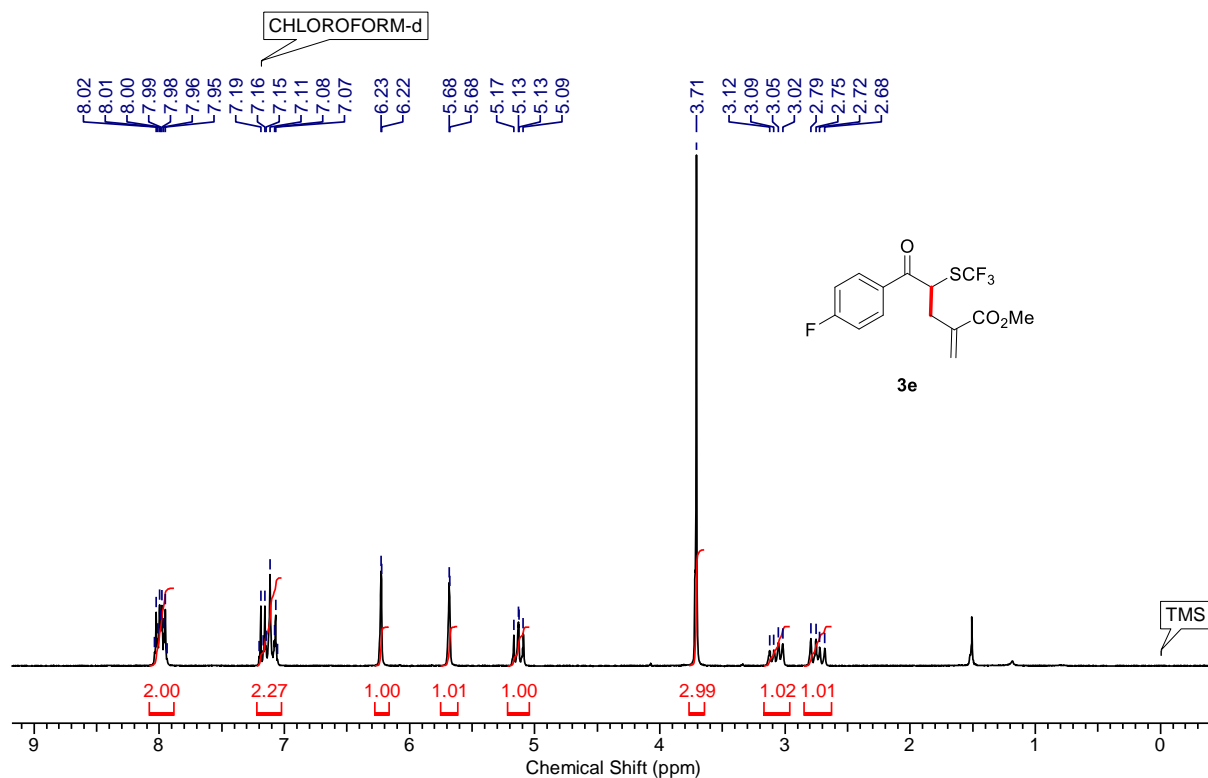

<sup>13</sup>C NMR, 50 MHz

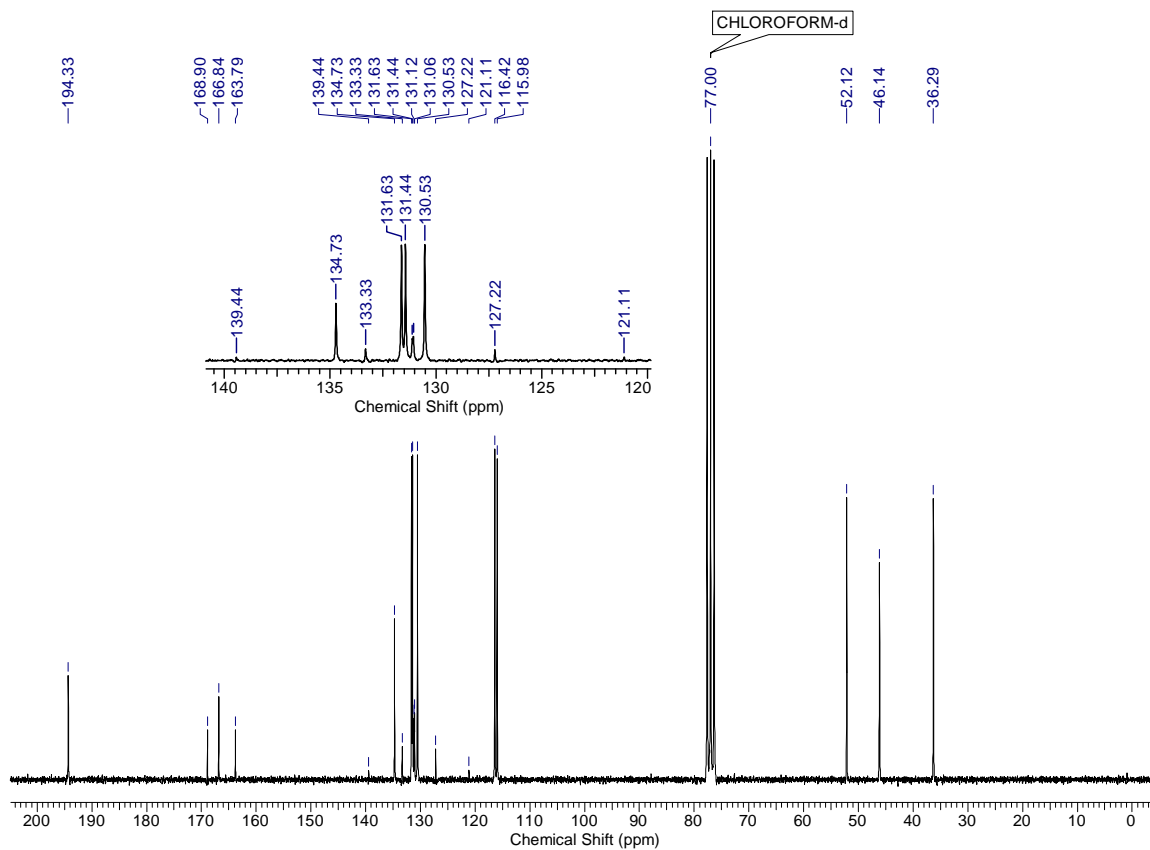

ESI-HRMS

BHA-1 #304 RT: 1.35 AV: 1 NL: 6.19E8  
T: FTMS + p ESI Full ms [100.0000-1500.0000]

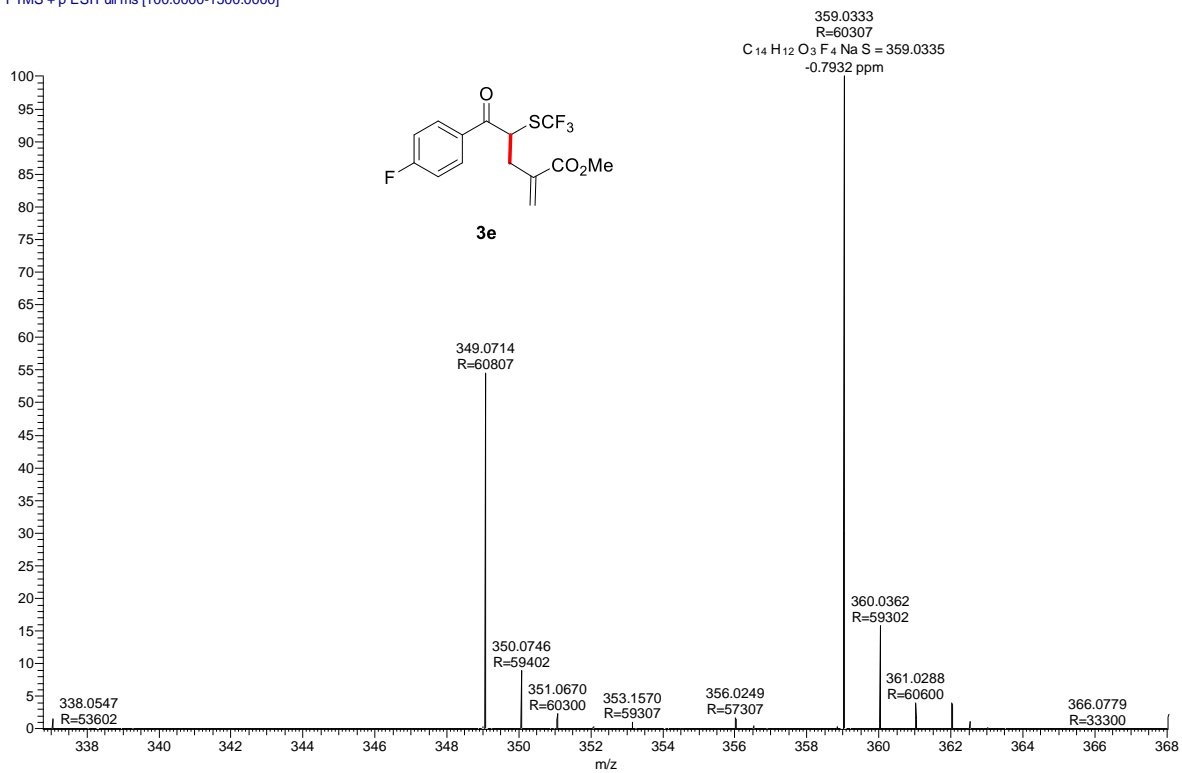

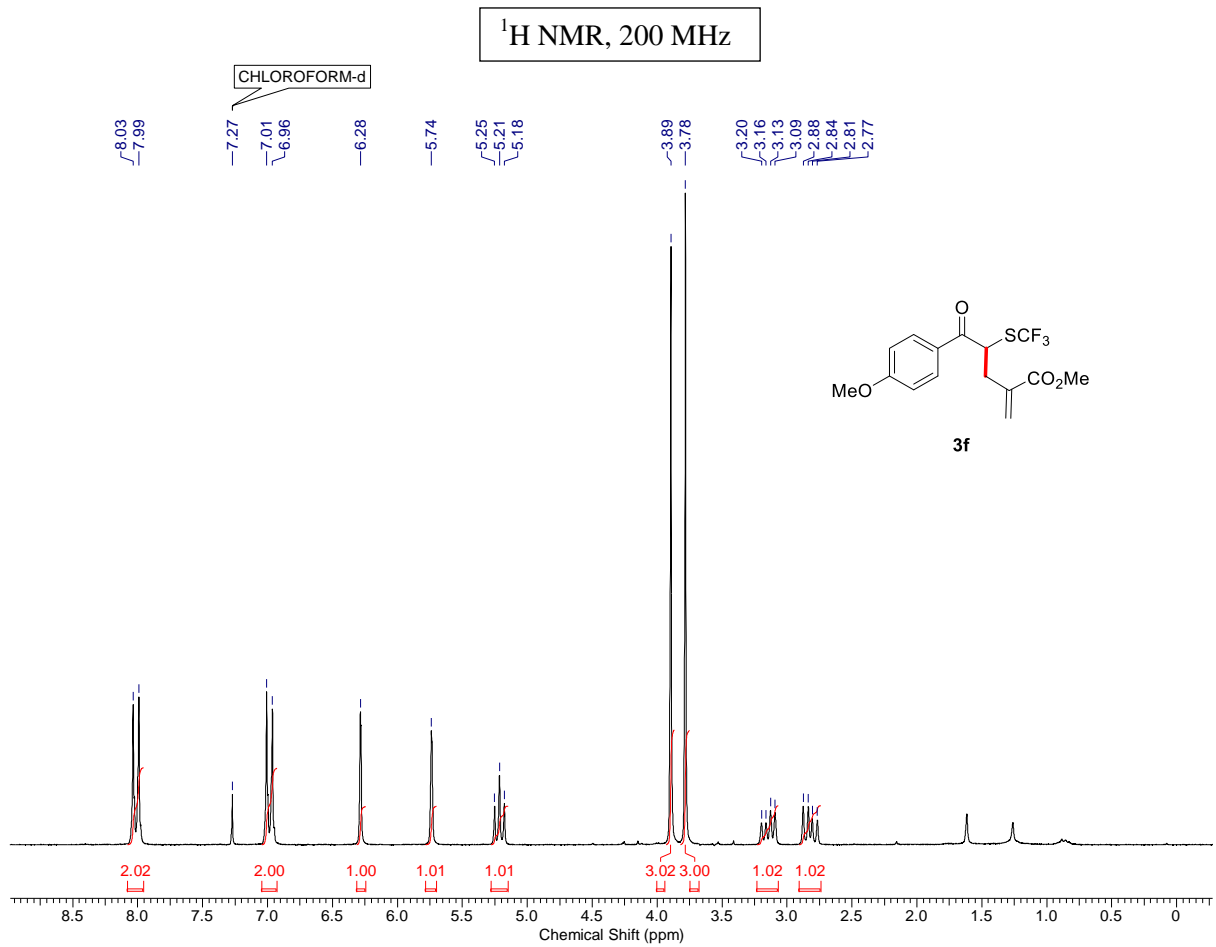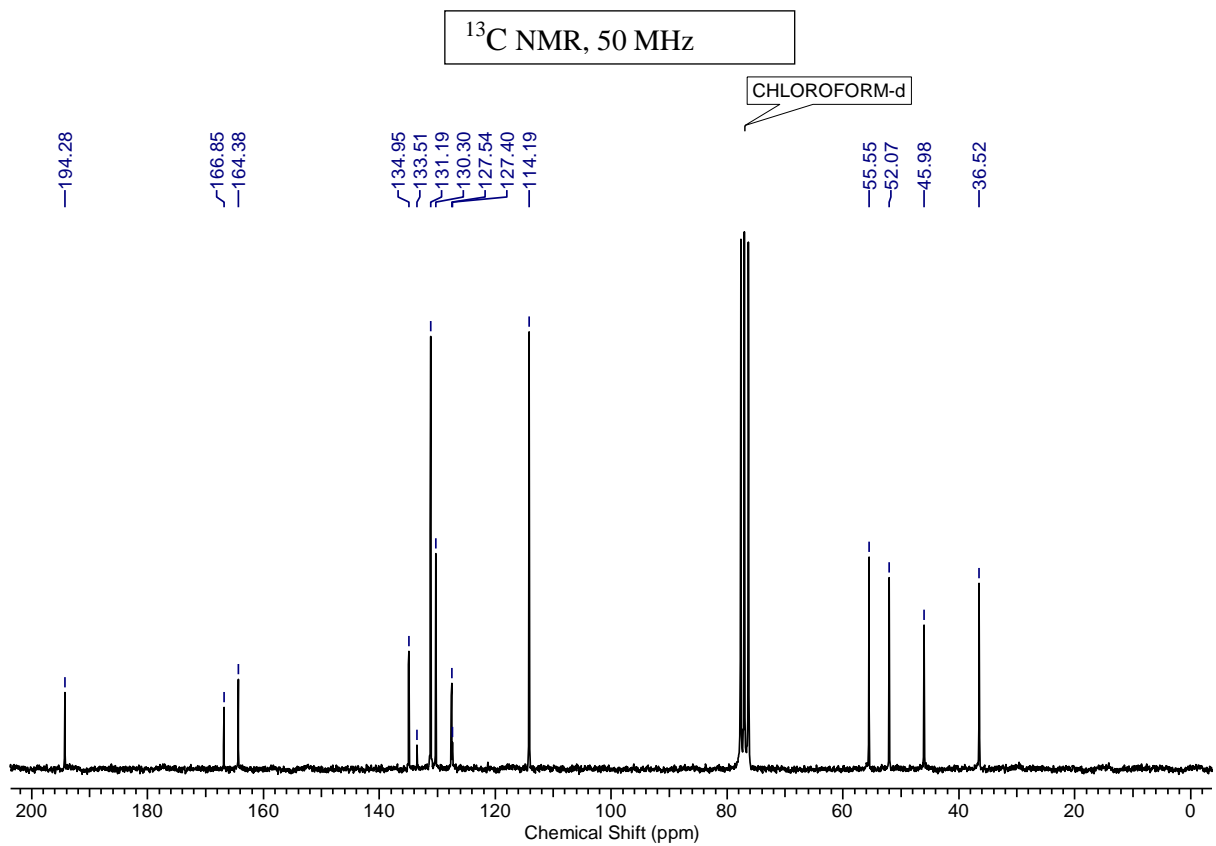

ESI-HRMS

BHA-2 #291 RT: 1.29 AV: 1 NL: 1.84E9  
T: FTMS + p ESI Full ms [100.0000-1500.0000]

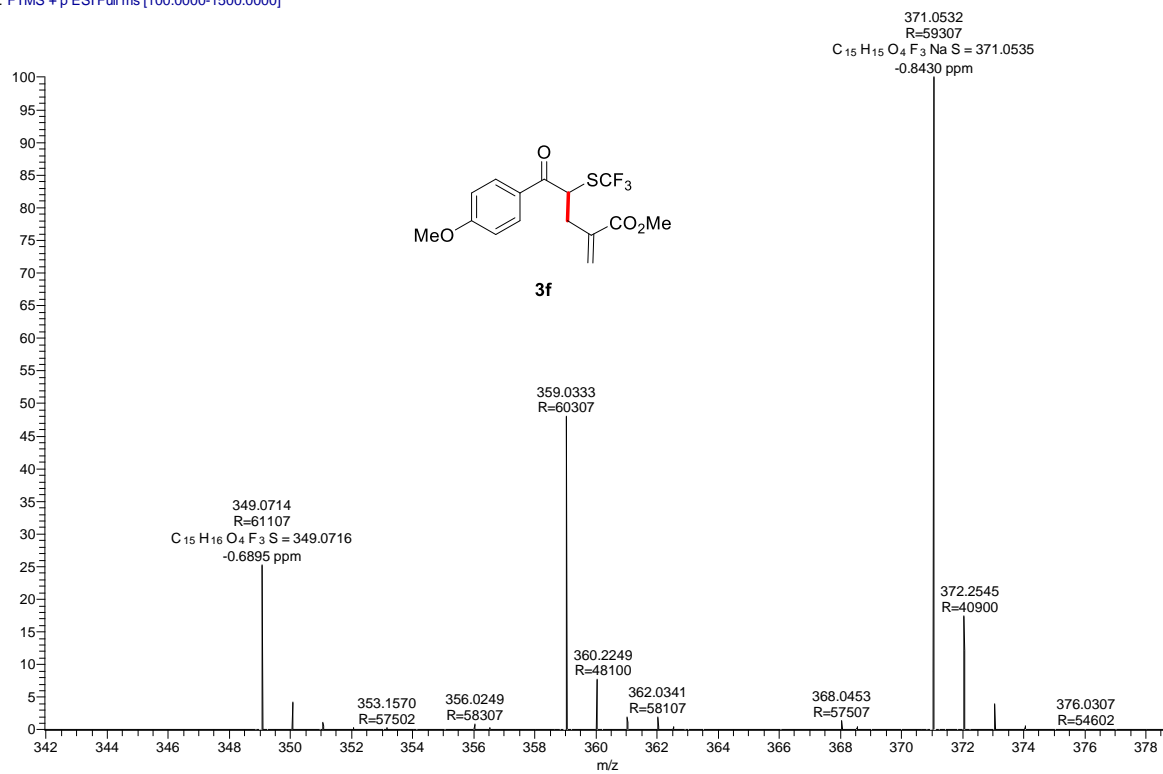

<sup>1</sup>H NMR, 400 MHz

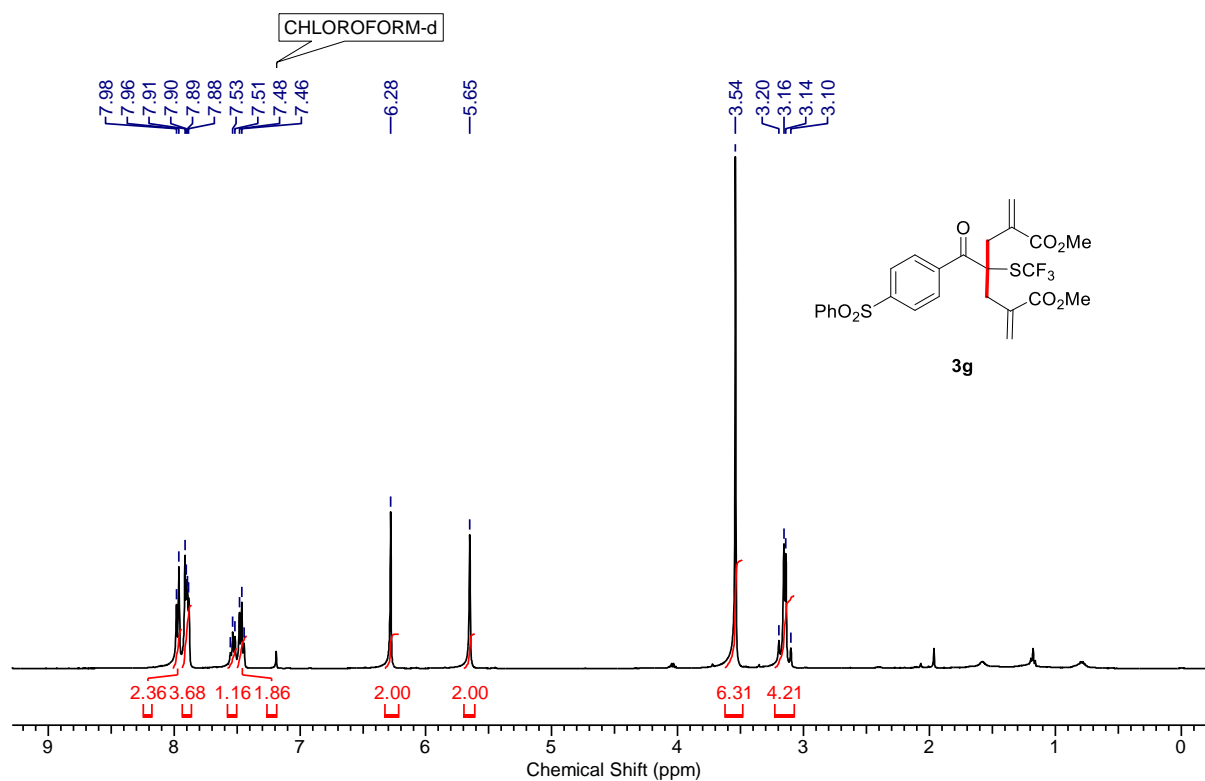

<sup>13</sup>C NMR, 100 MHz

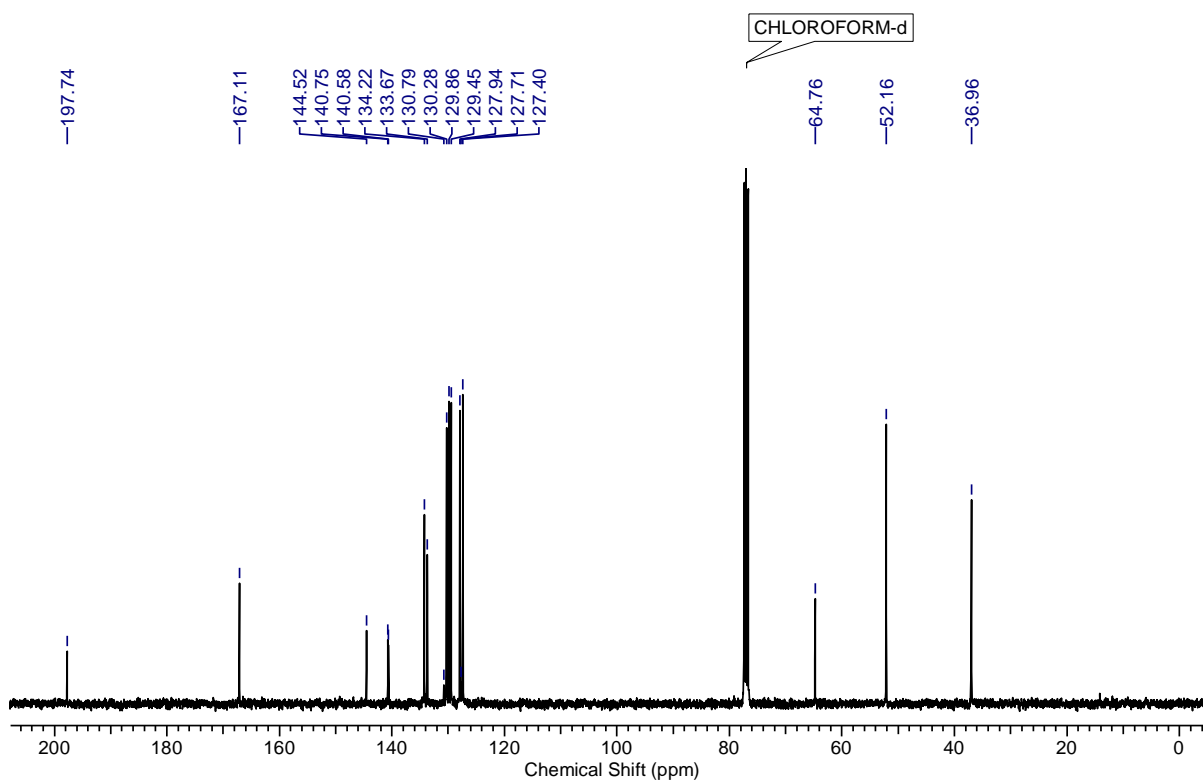



ESI-HRMS

BHA-11 #272 RT: 1.21 AV: 1 NL: 3.15E8  
T: FTMS + p ESI Full ms [100.0000-1500.0000]

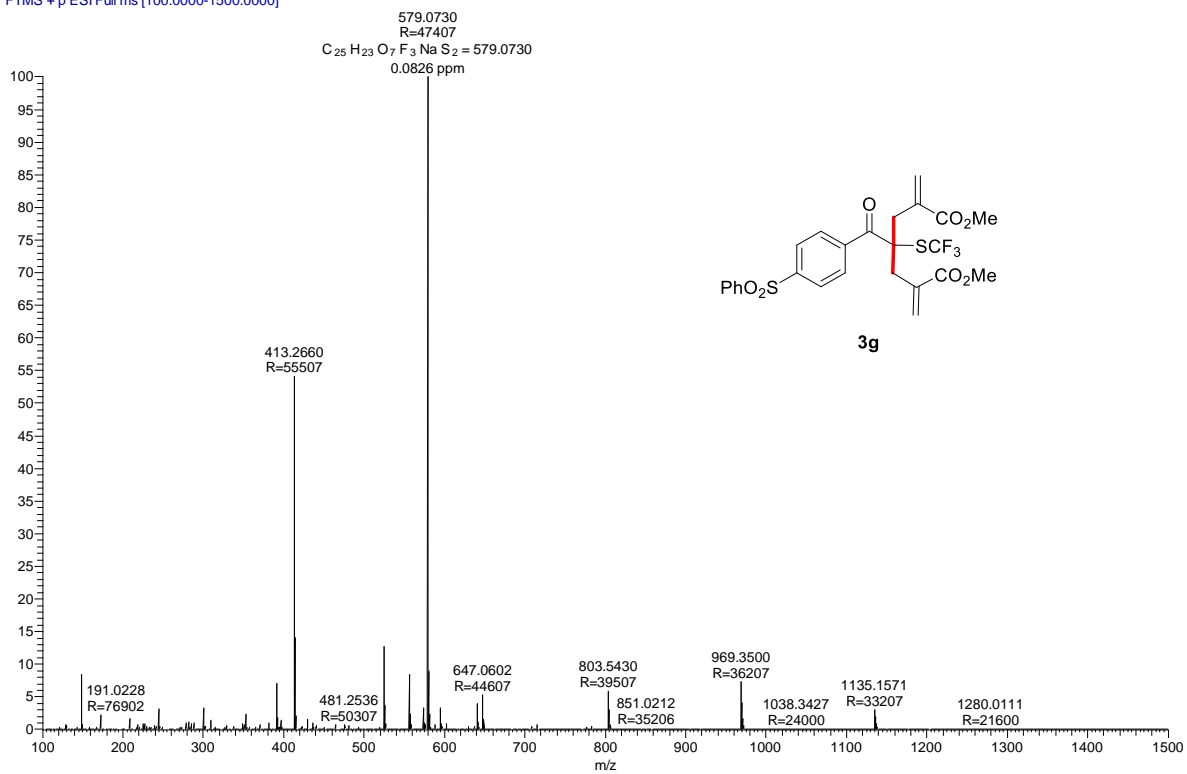

<sup>1</sup>H NMR, 400 MHz

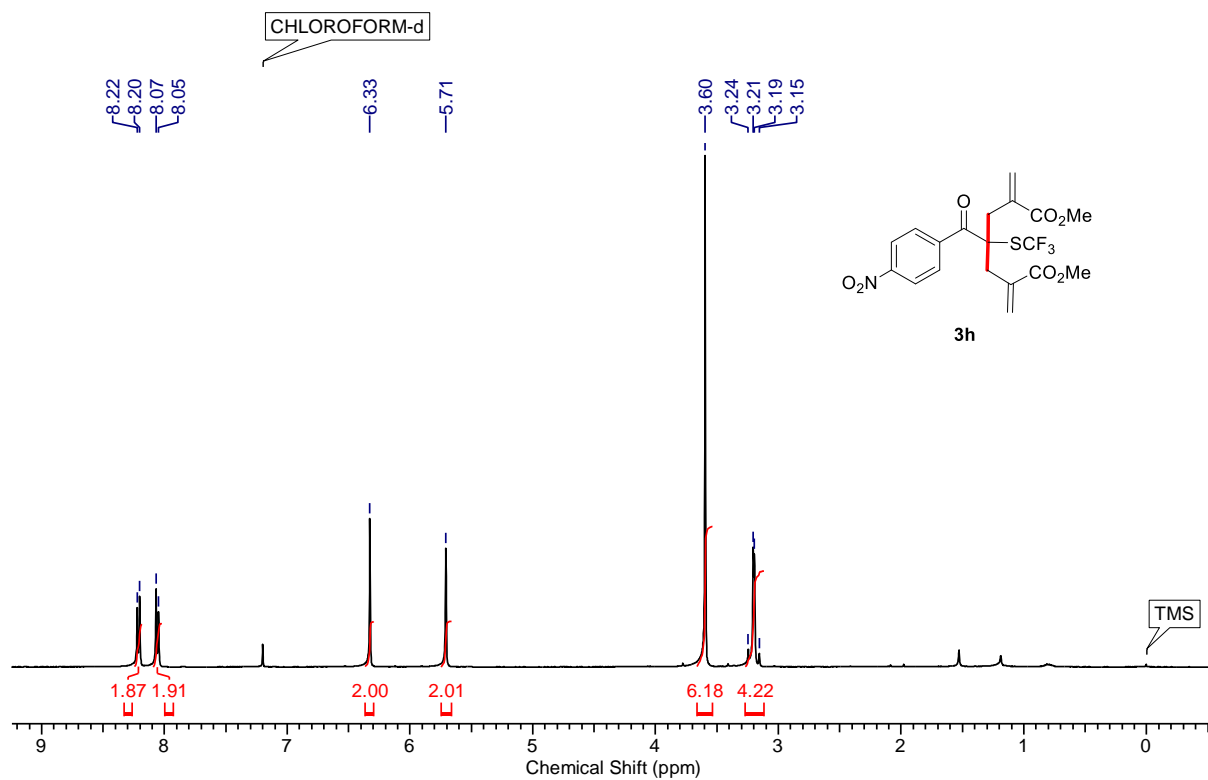

<sup>13</sup>C NMR, 100 MHz

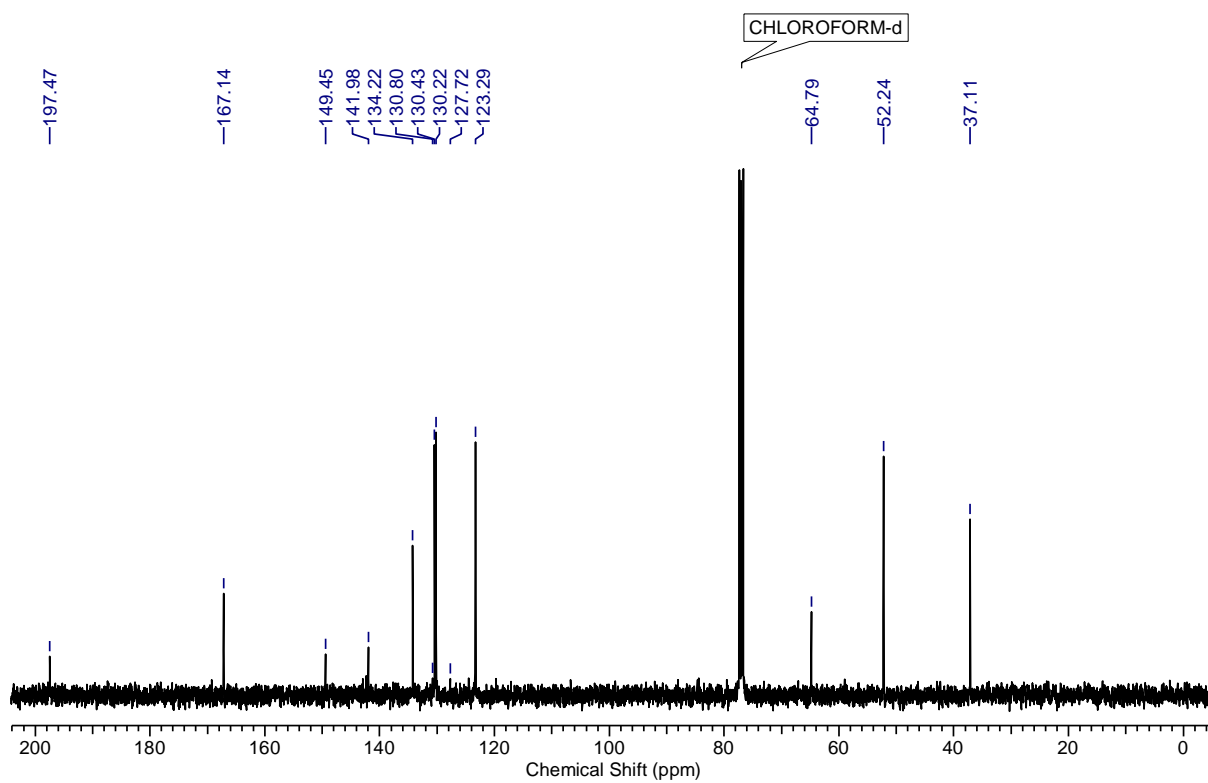

ESI-HRMS

BHA-12 #278 RT: 1.24 AV: 1 NL: 9.44E8  
T: FTMS + p ESI Full ms [100.0000-1500.0000]

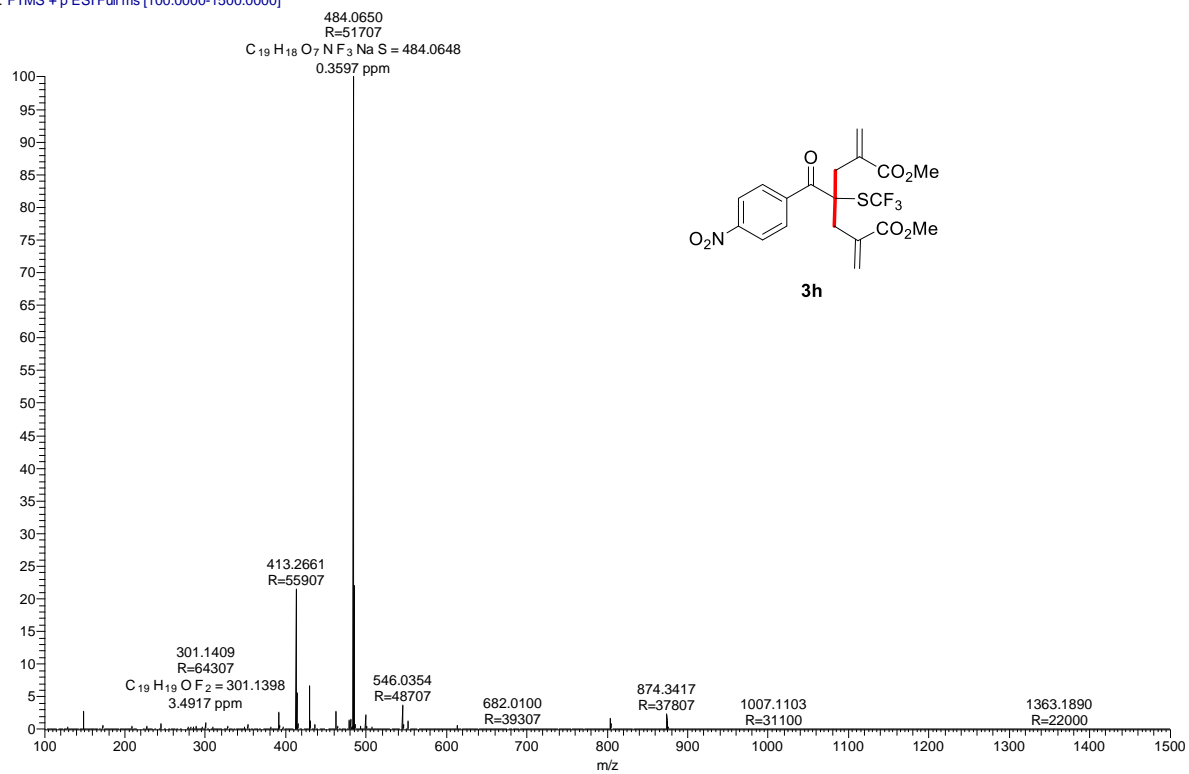

<sup>1</sup>H NMR, 500 MHz

CHLOROFORM-d

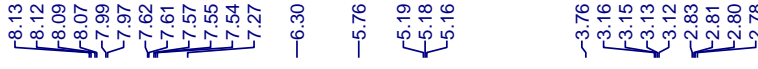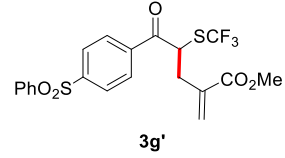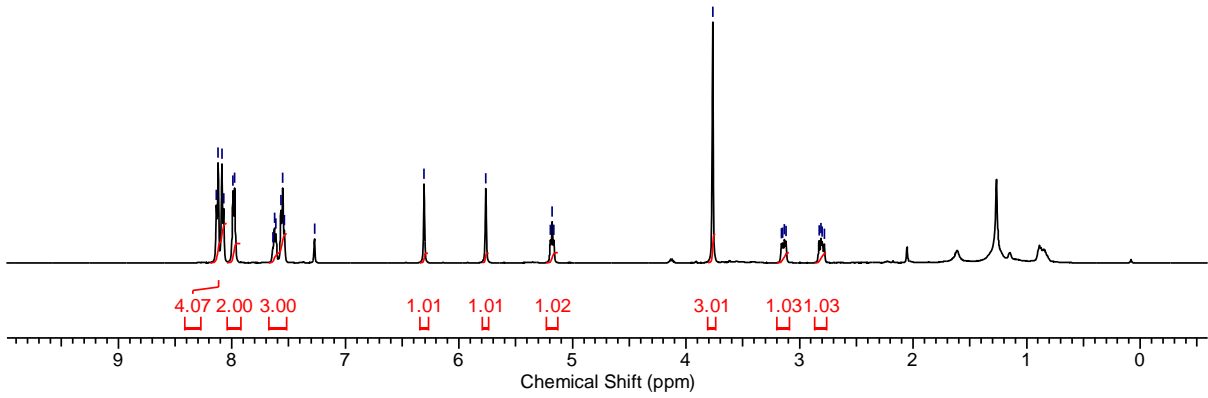

<sup>13</sup>C NMR, 125 MHz

CHLOROFORM-d

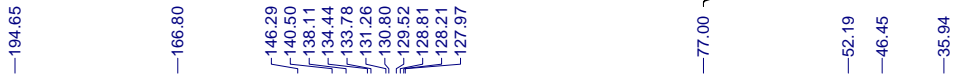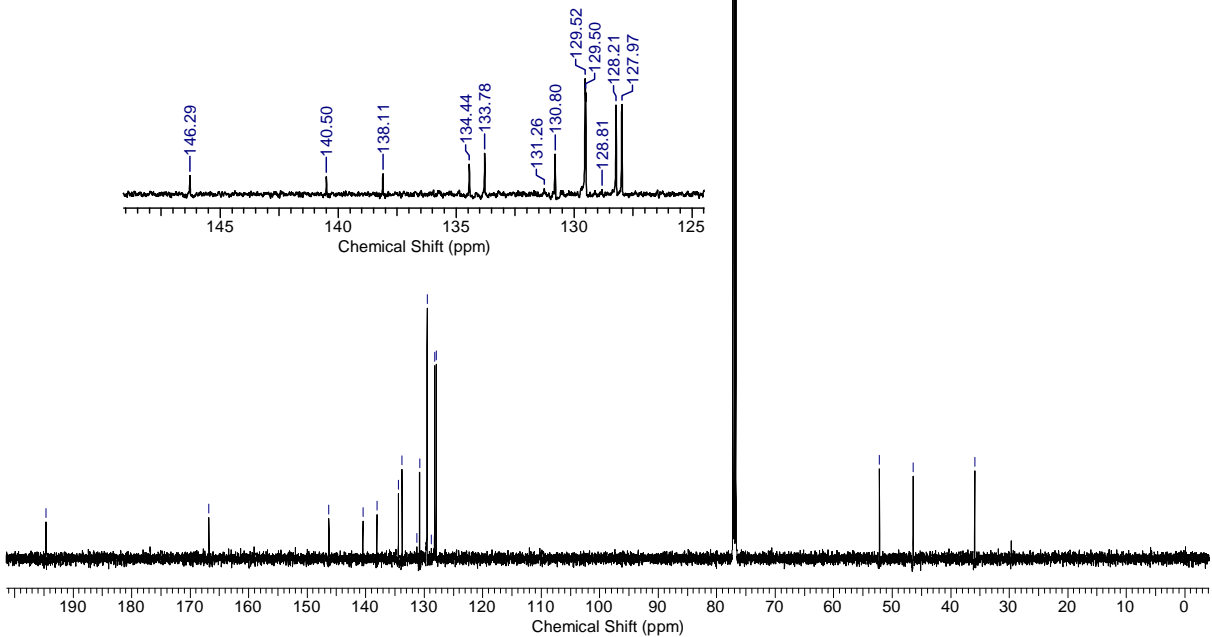

ESI-HRMS

SEF3 #263 RT: 1.17 AV: 1 NL: 1.73E7  
T: FTMS + p ESI Full ms [133.4000-2000.0000]

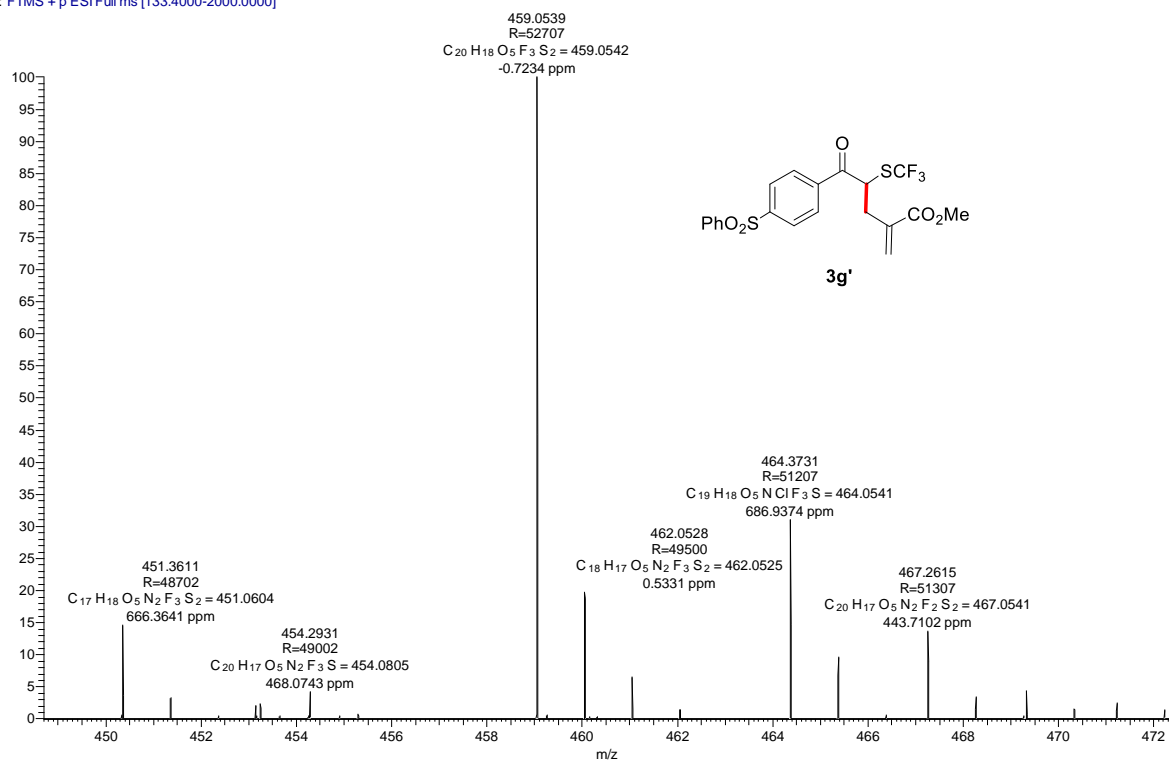

<sup>1</sup>H NMR, 400 MHz

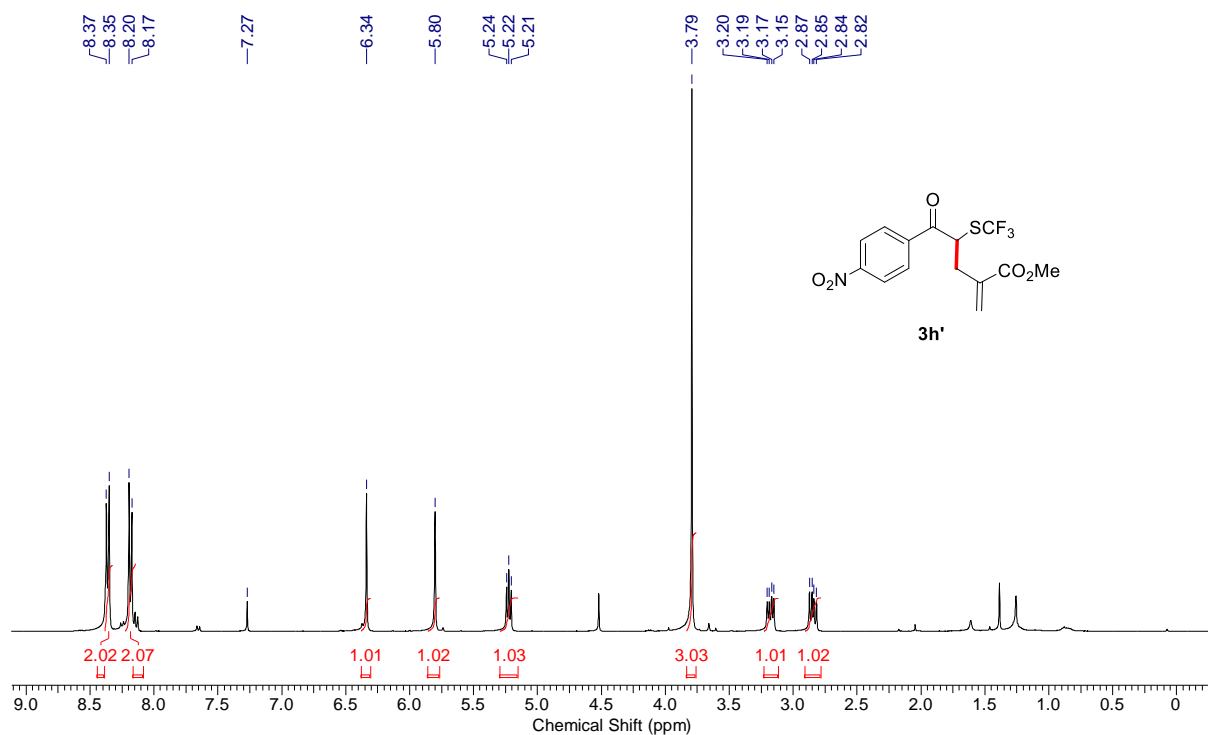

<sup>13</sup>C NMR, 100 MHz

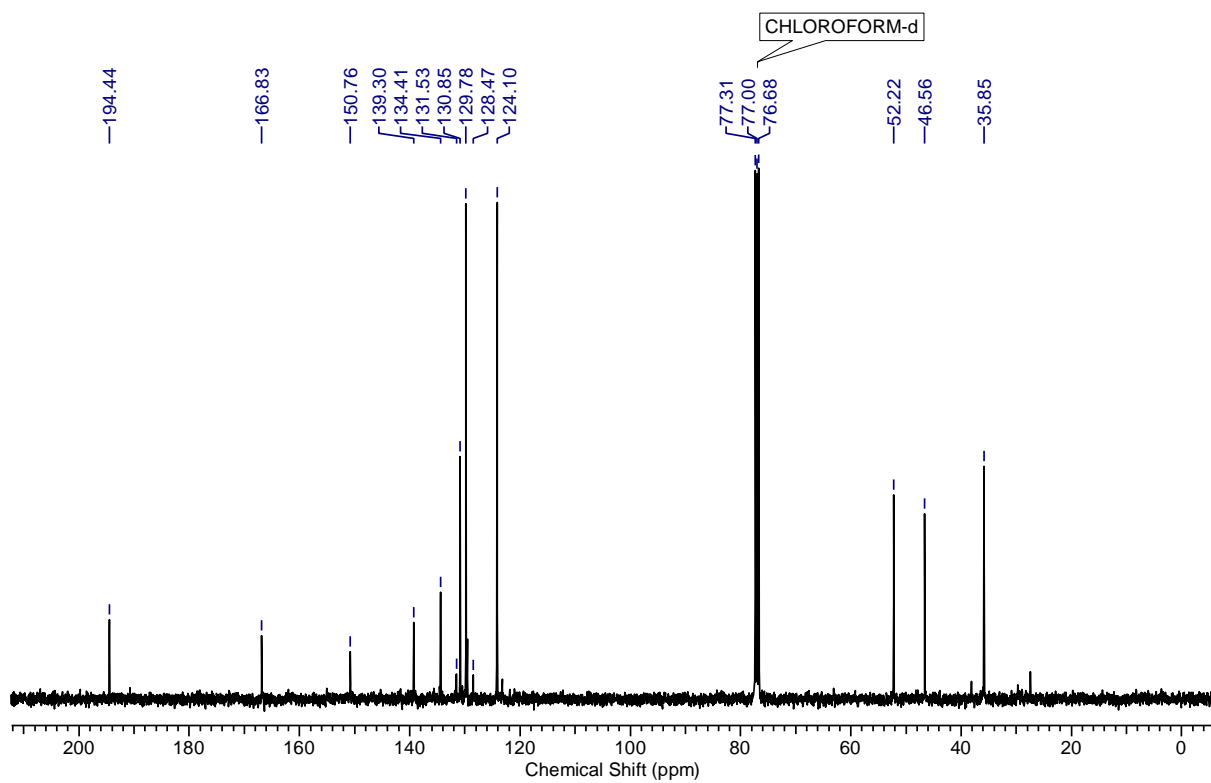

ESI-HRMS

SeF3-1 #280 RT: 1.68 AV: 1 NL: 4.41E5  
T: FTMS + p ESI Full ms [100.0000-1500.0000]

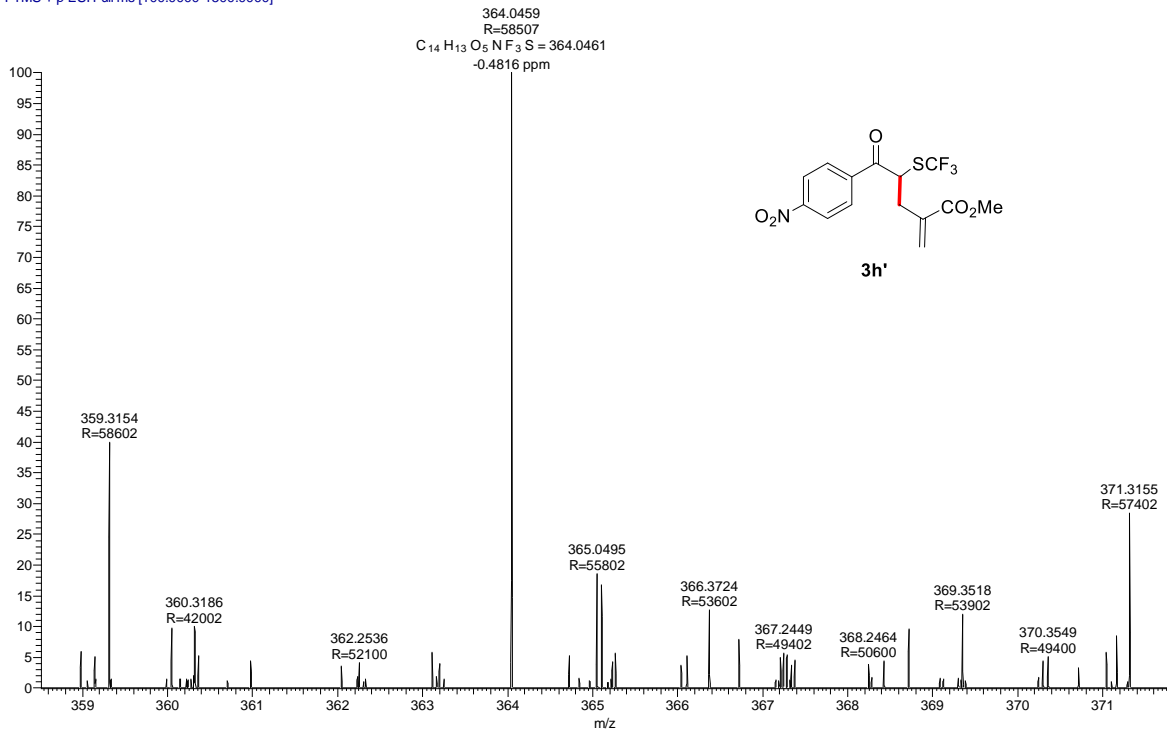

<sup>1</sup>H NMR, 400 MHz

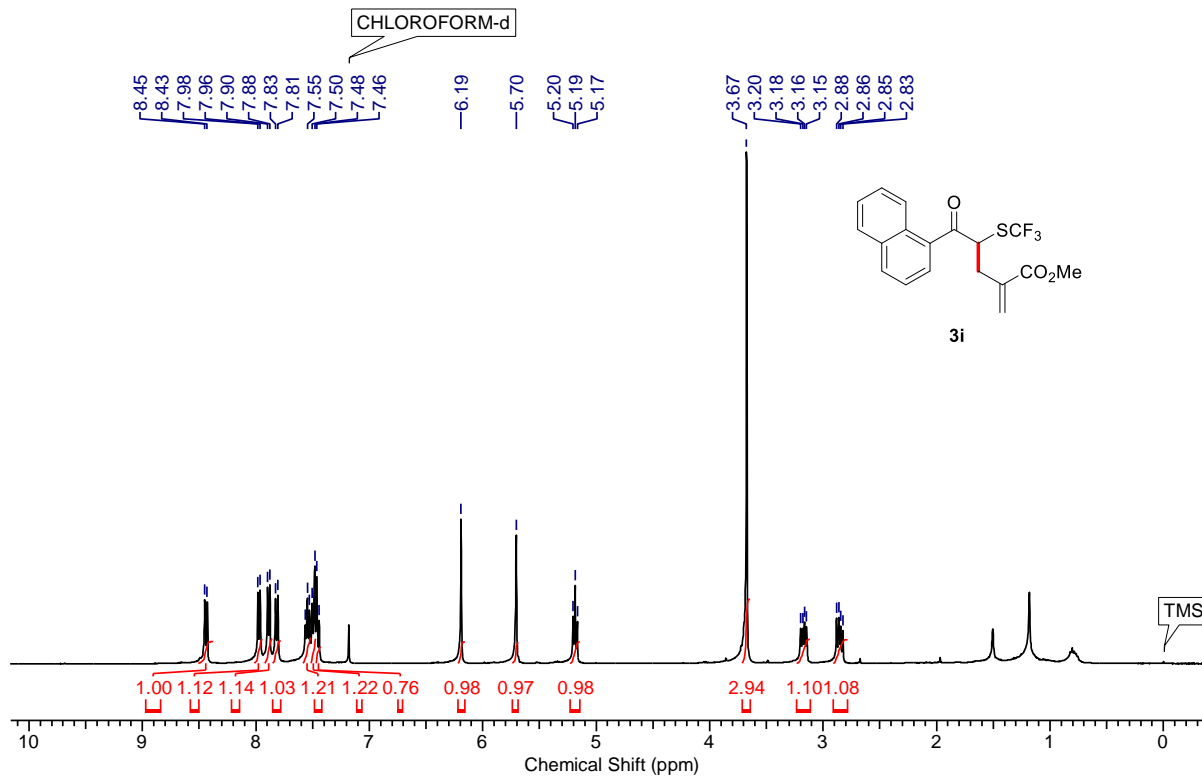

<sup>13</sup>C NMR, 100 MHz

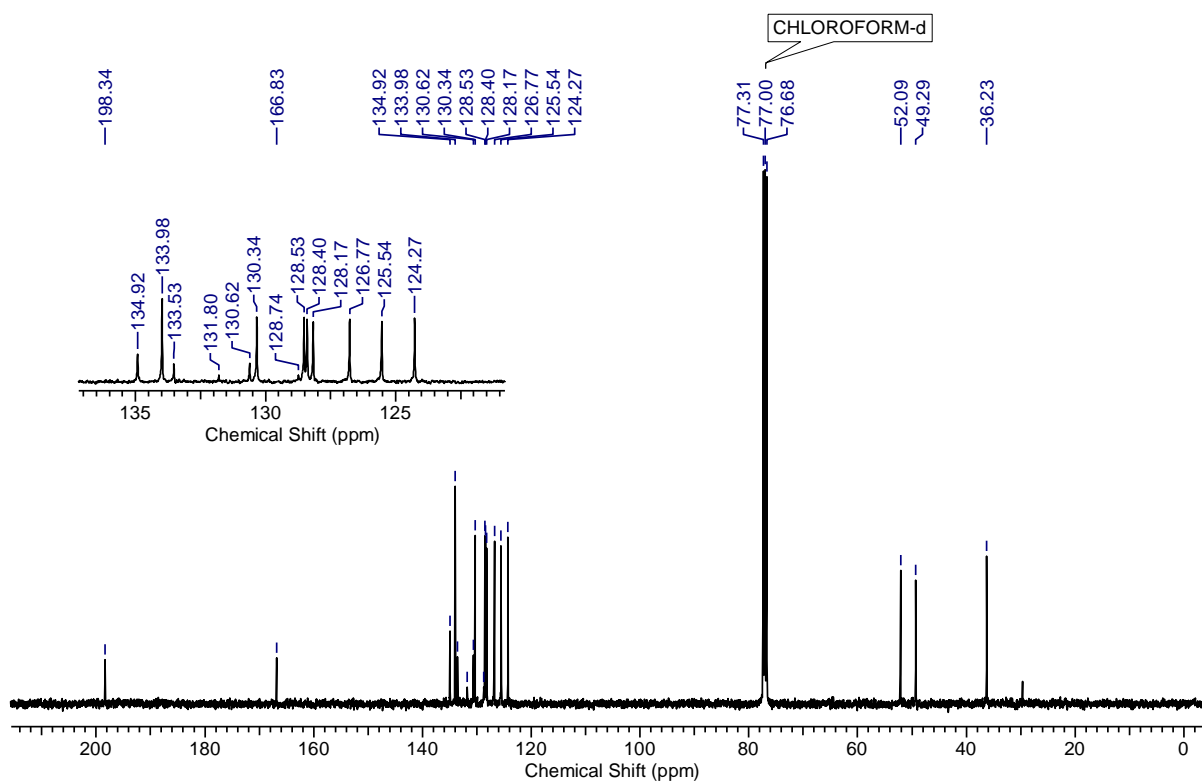



ESI-HRMS

BHA-10 #300 RT: 1.33 AV: 1 NL: 1.35E9  
T: FTMS + p ESI Full ms [100.0000-1500.0000]

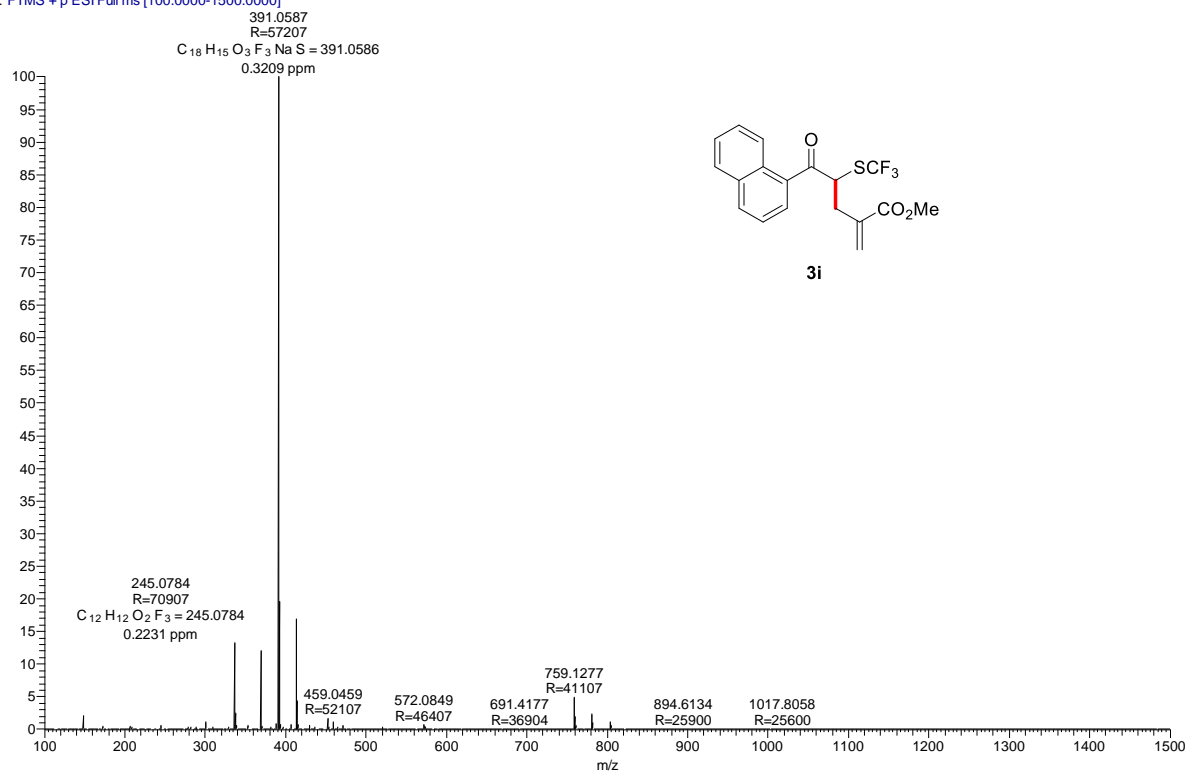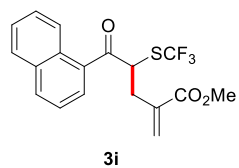



# ESI-HRMS

BHA-9 #304 RT: 1.35 AV: 1 NL: 1.34E9  
T: FTMS + p ESI Full ms [100.0000-1500.0000]

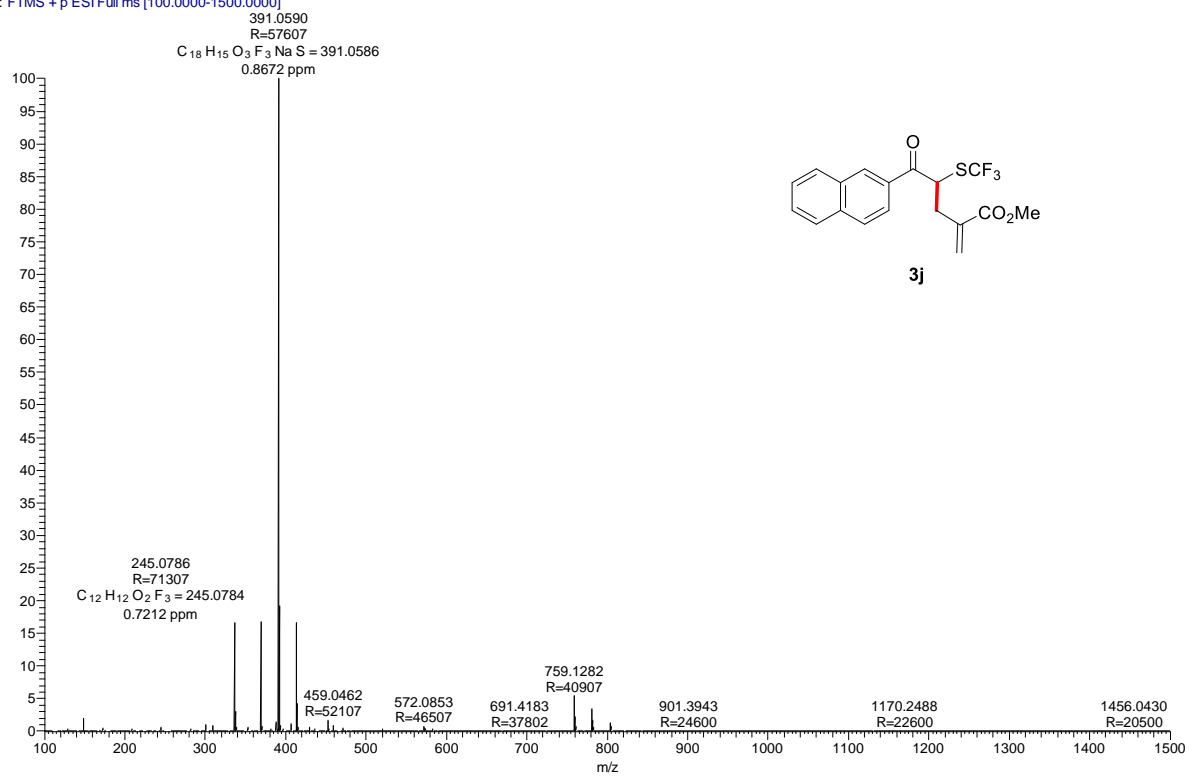

<sup>1</sup>H NMR, 400 MHz

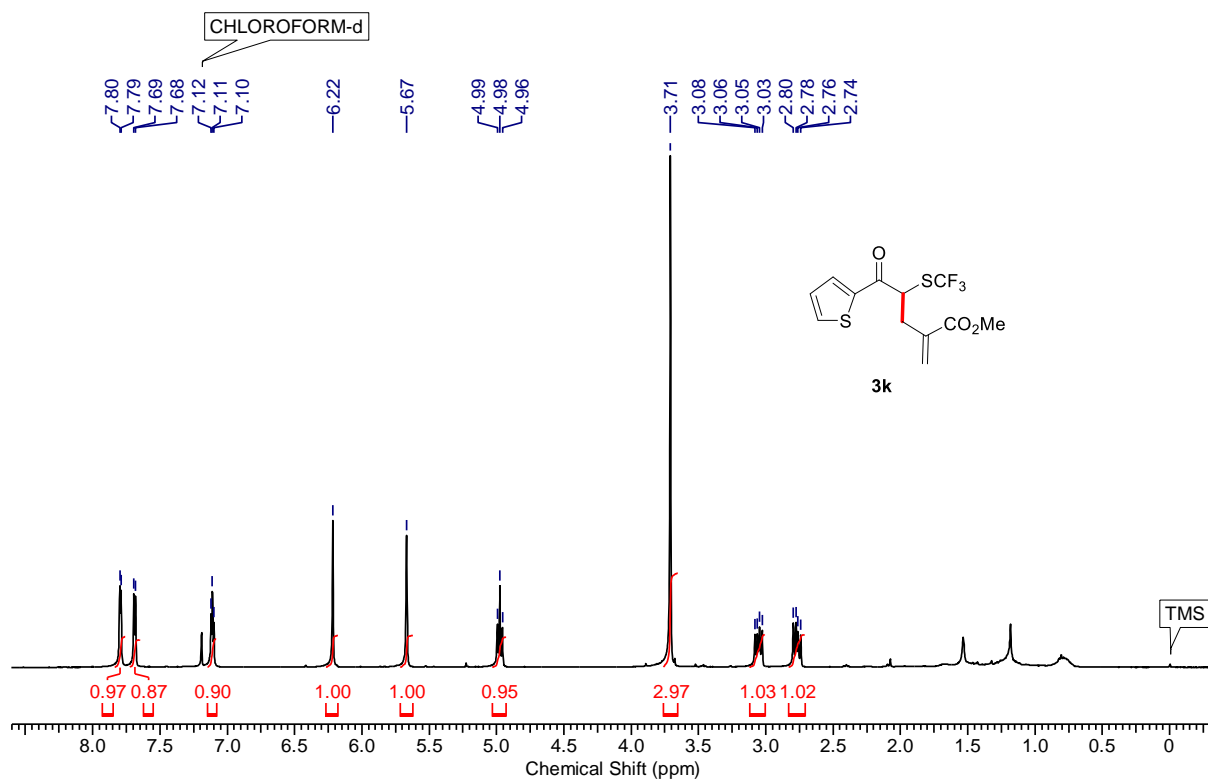

<sup>13</sup>C NMR, 100 MHz

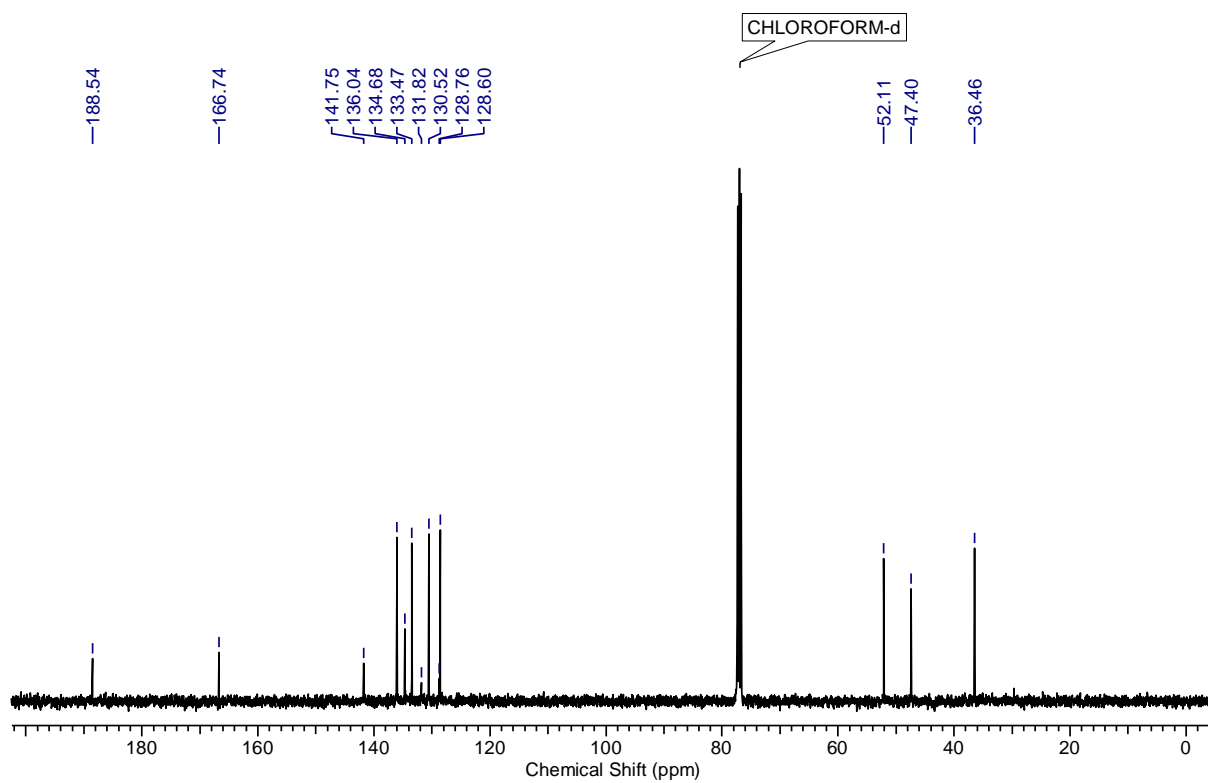

ESI-HRMS

BHA-5 #280 RT: 1.25 AV: 1 NL: 1.84E9  
T: FTMS + p ESI Full ms [100.0000-1500.0000]

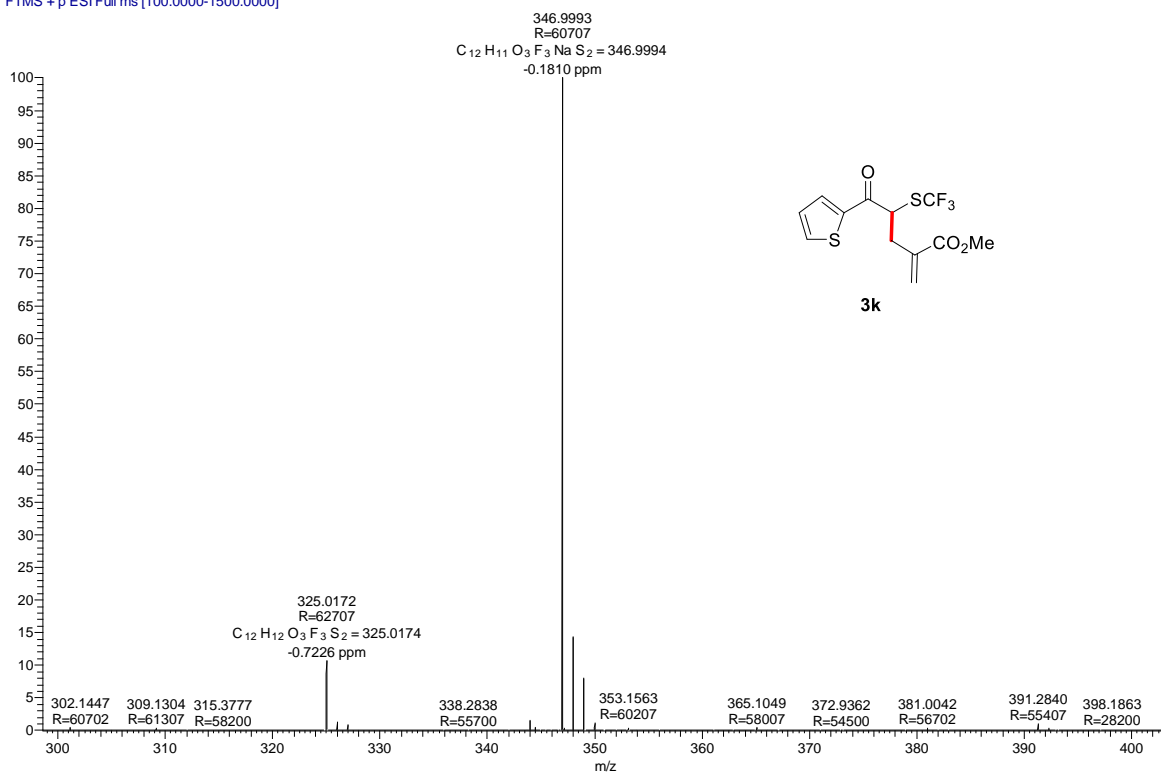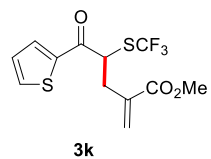

<sup>1</sup>H NMR, 400 MHz

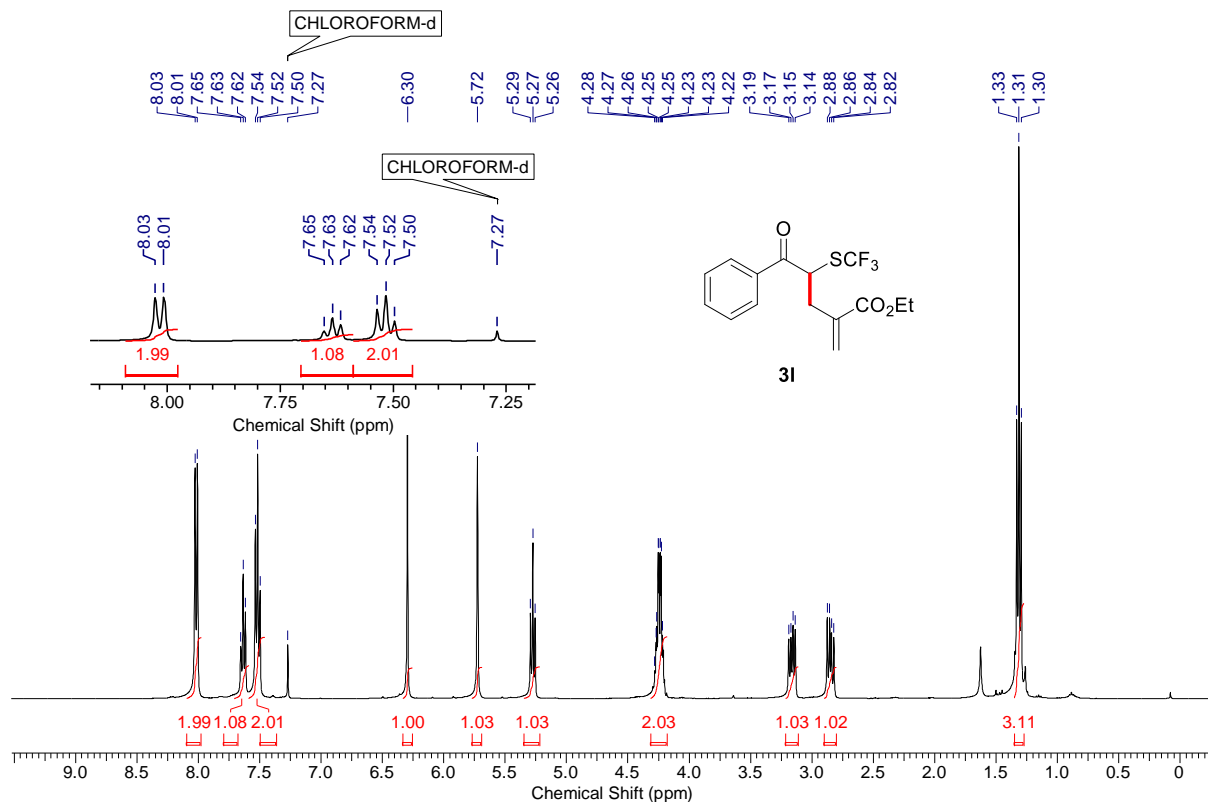

<sup>13</sup>C NMR, 100 MHz

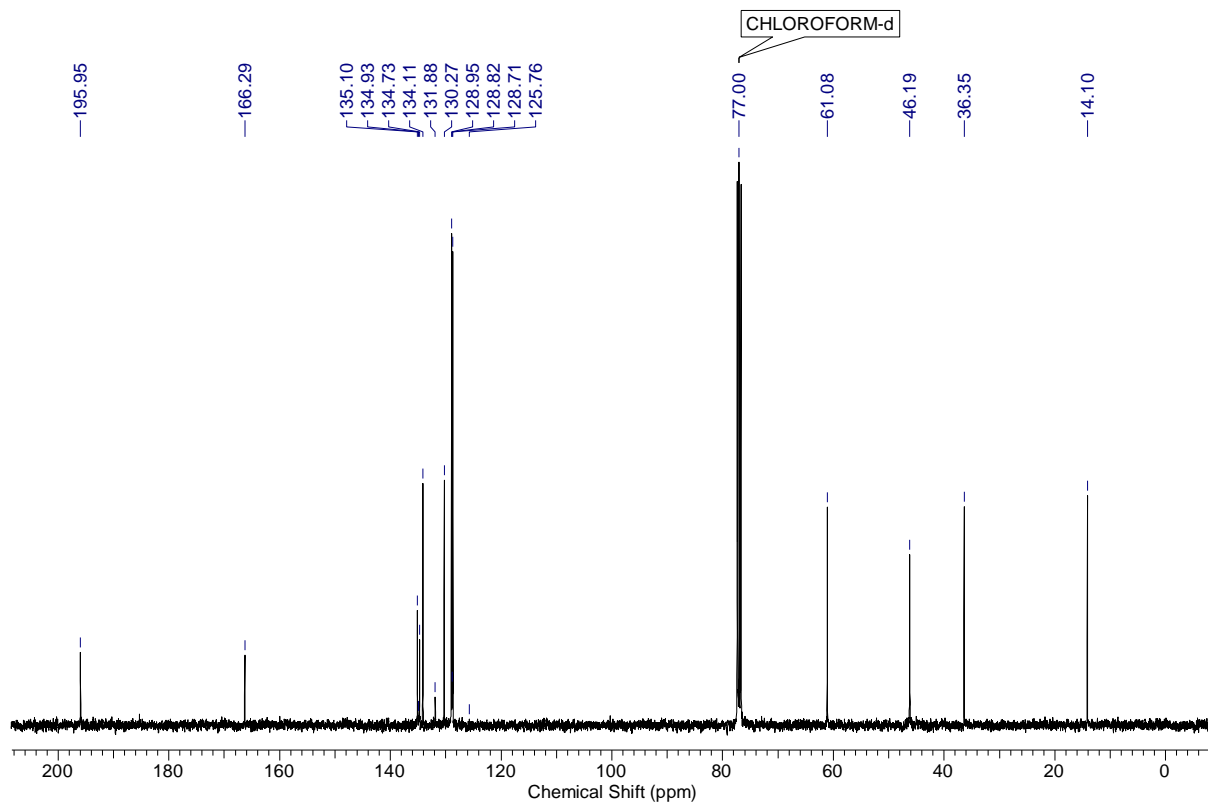

ESI-HRMS

BHA-13 #291 RT: 1.29 AV: 1 NL: 9.58E8  
T: FTMS + p ESI Full ms [100.0000-1500.0000]

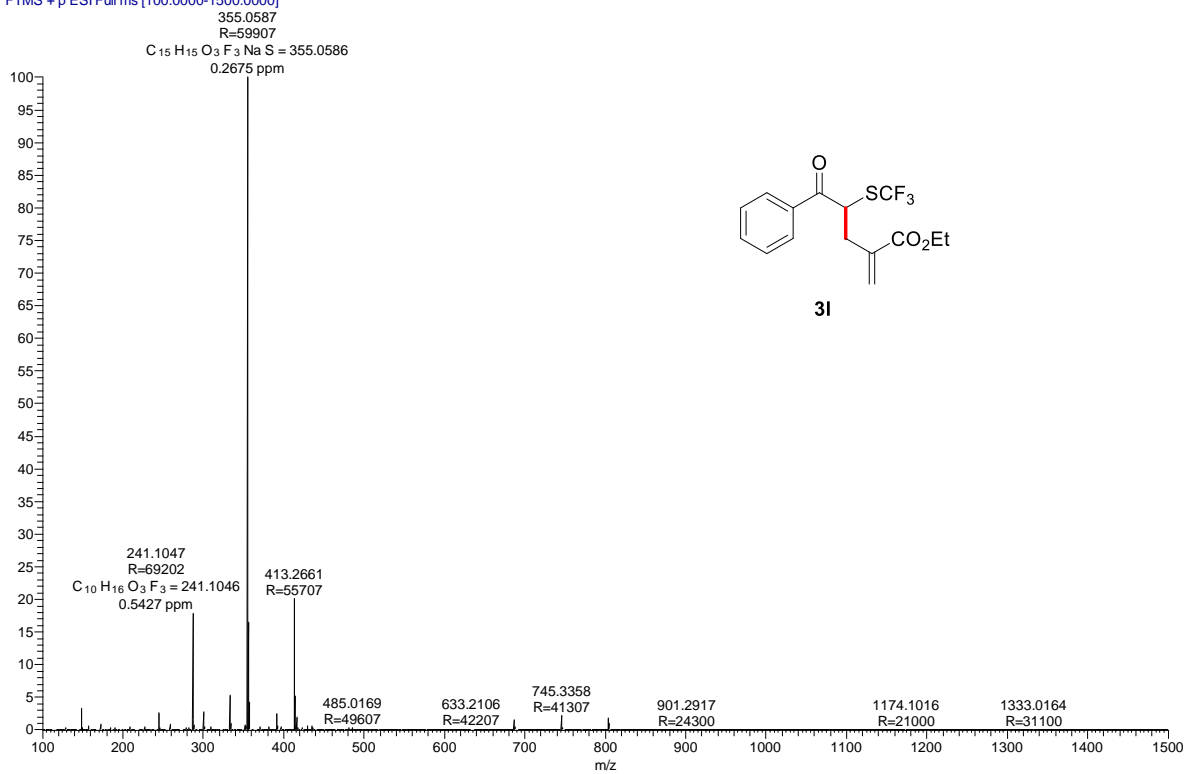

<sup>1</sup>H NMR, 400 MHz

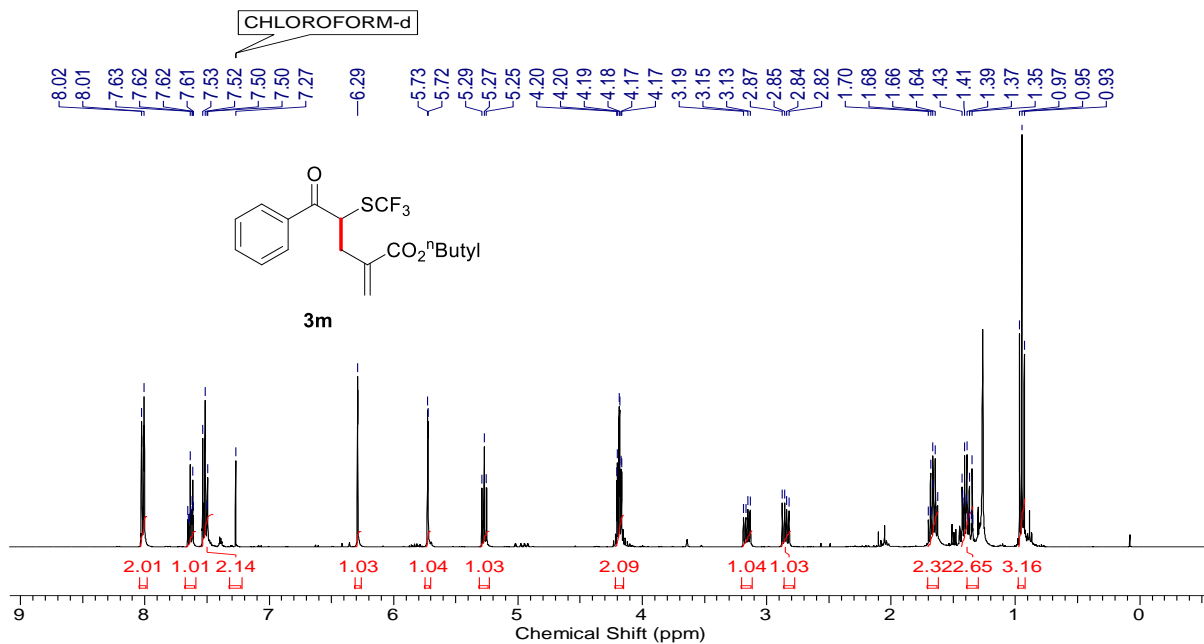

<sup>13</sup>C NMR, 100 MHz

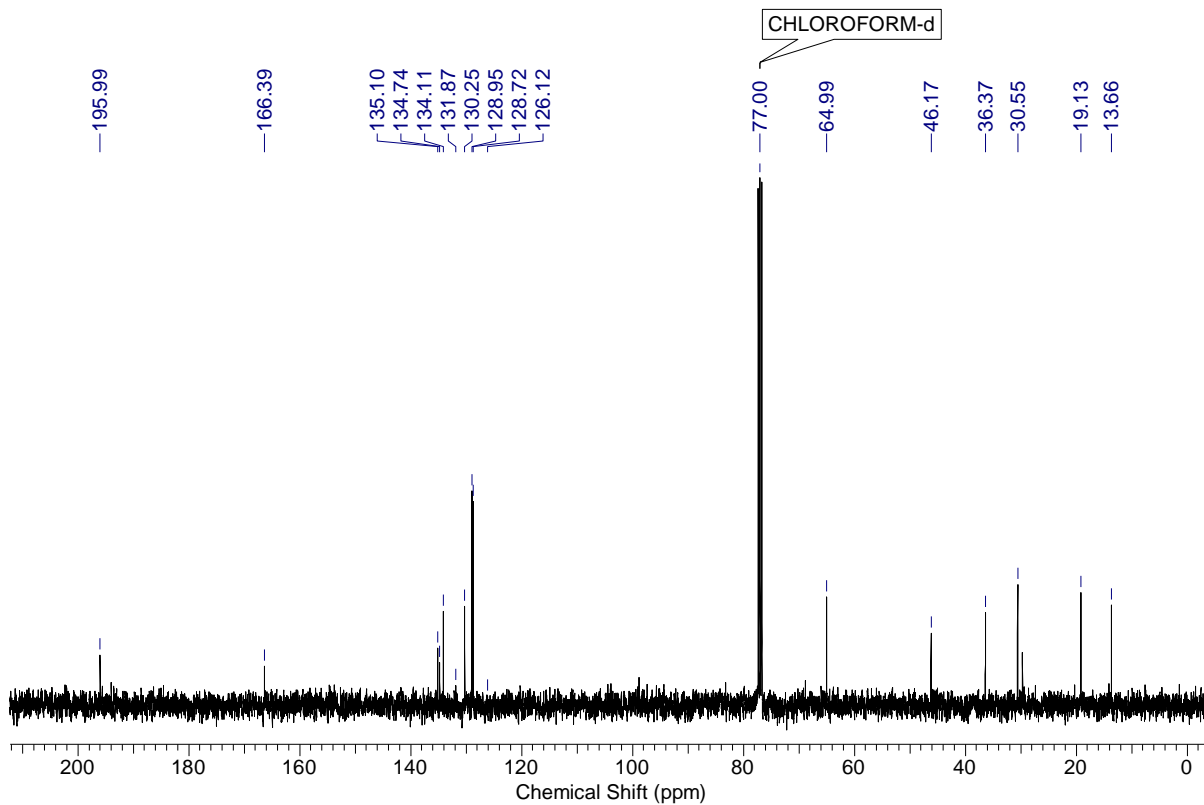



ESI-HRMS

SeF3-2 #327 RT: 1.95 AV: 1 NL: 9.43E8  
T: FTMS + p ESI Full ms [100.0000-1500.0000]

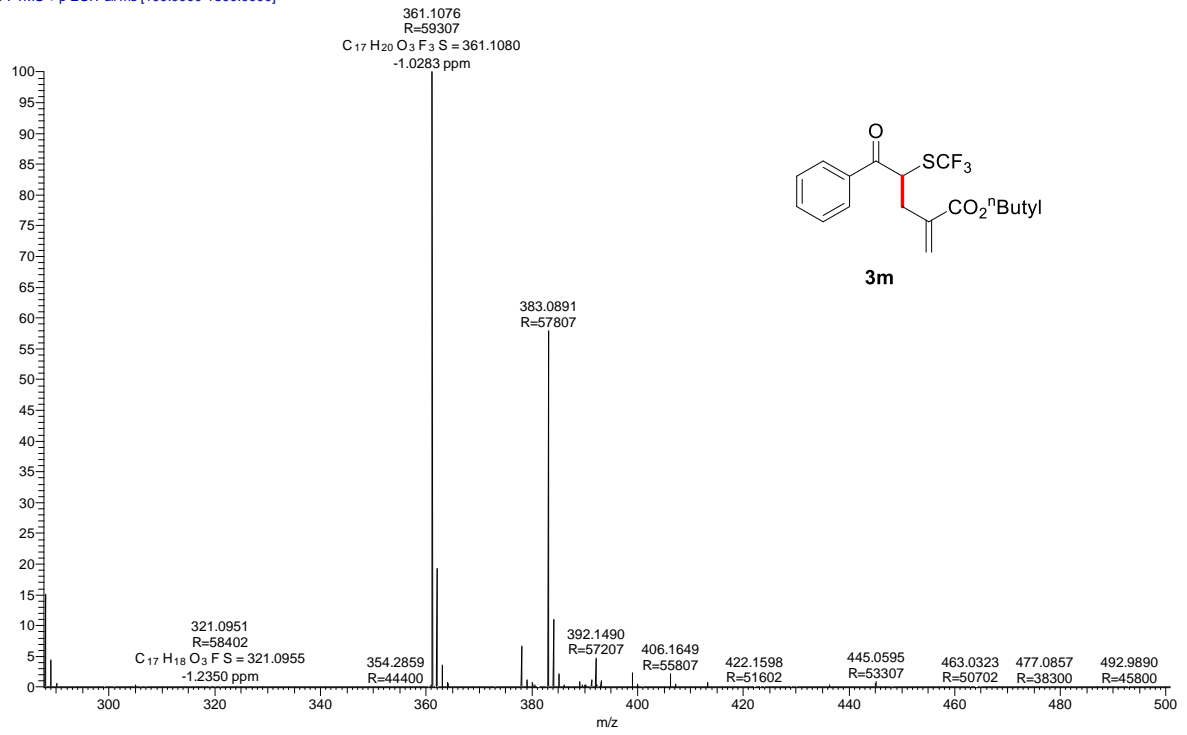

<sup>1</sup>H NMR, 400 MHz

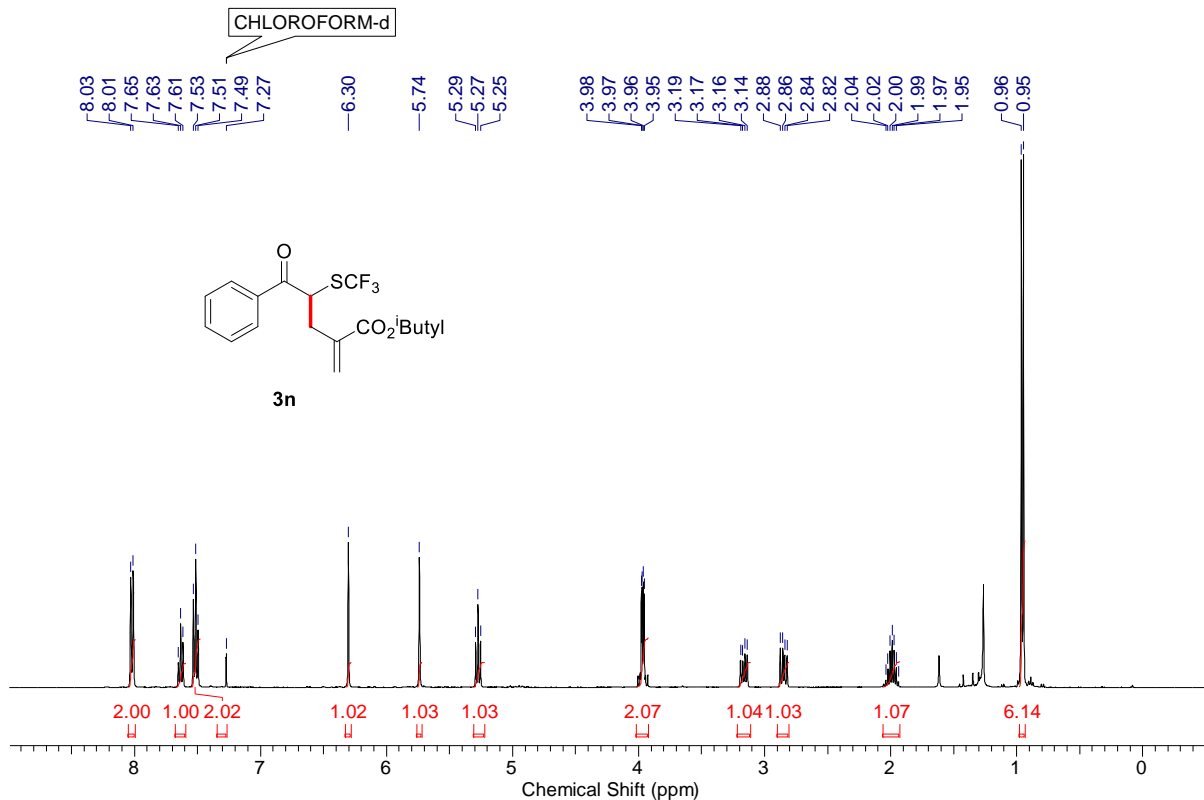

<sup>13</sup>C NMR, 100 MHz

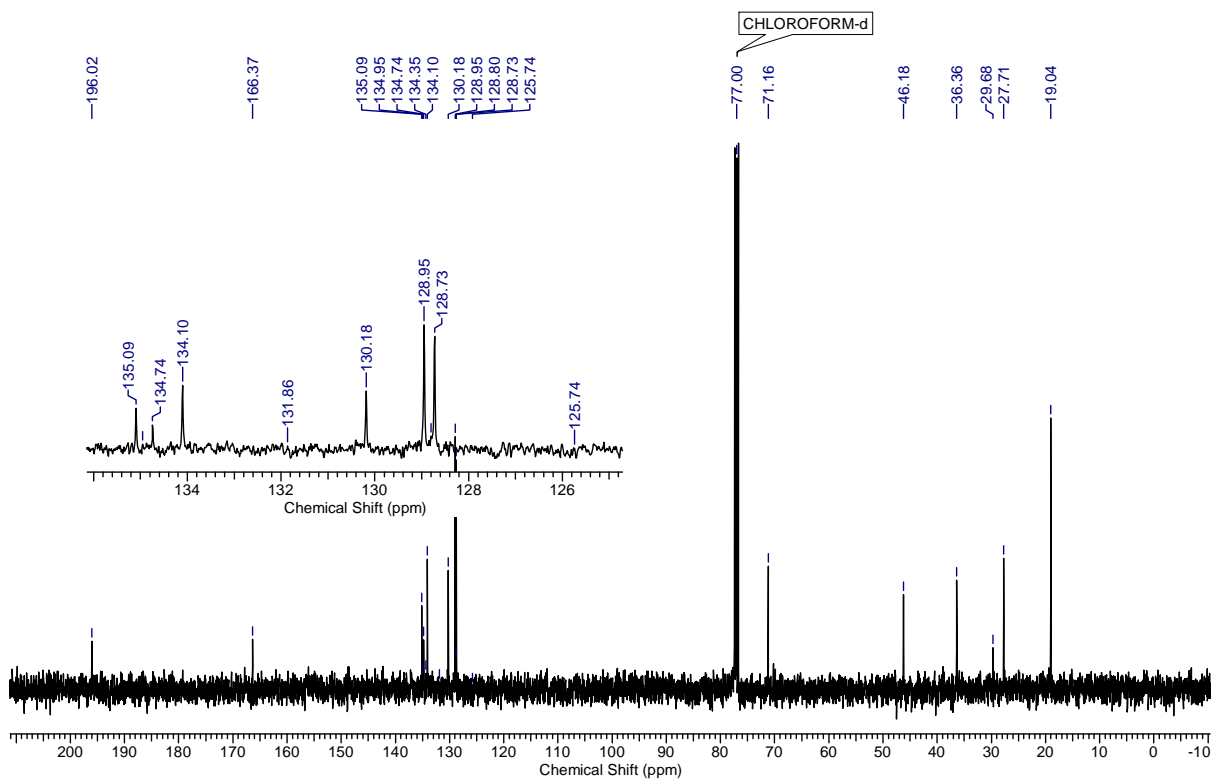

ESI-HRMS

SEF3-16 #300 RT: 1.33 AV: 1 NL: 5.59E7  
T: FTMS + p ESI Full ms [133.4000-2000.0000]

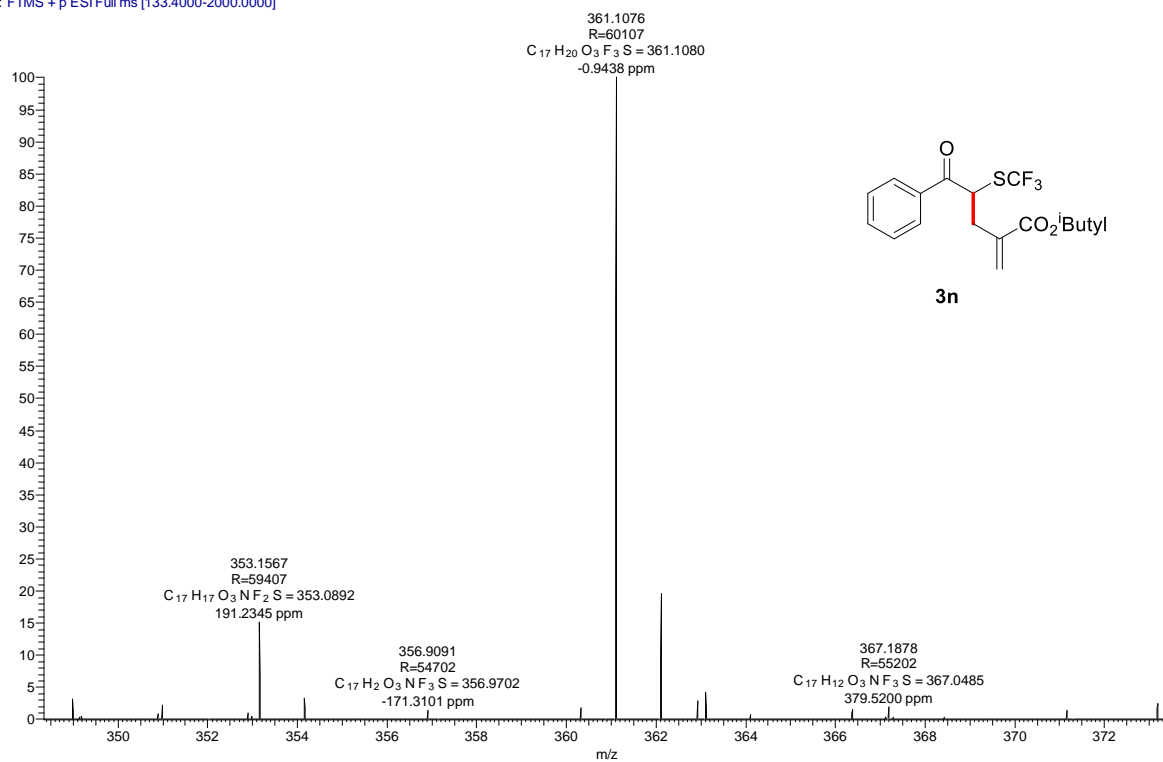

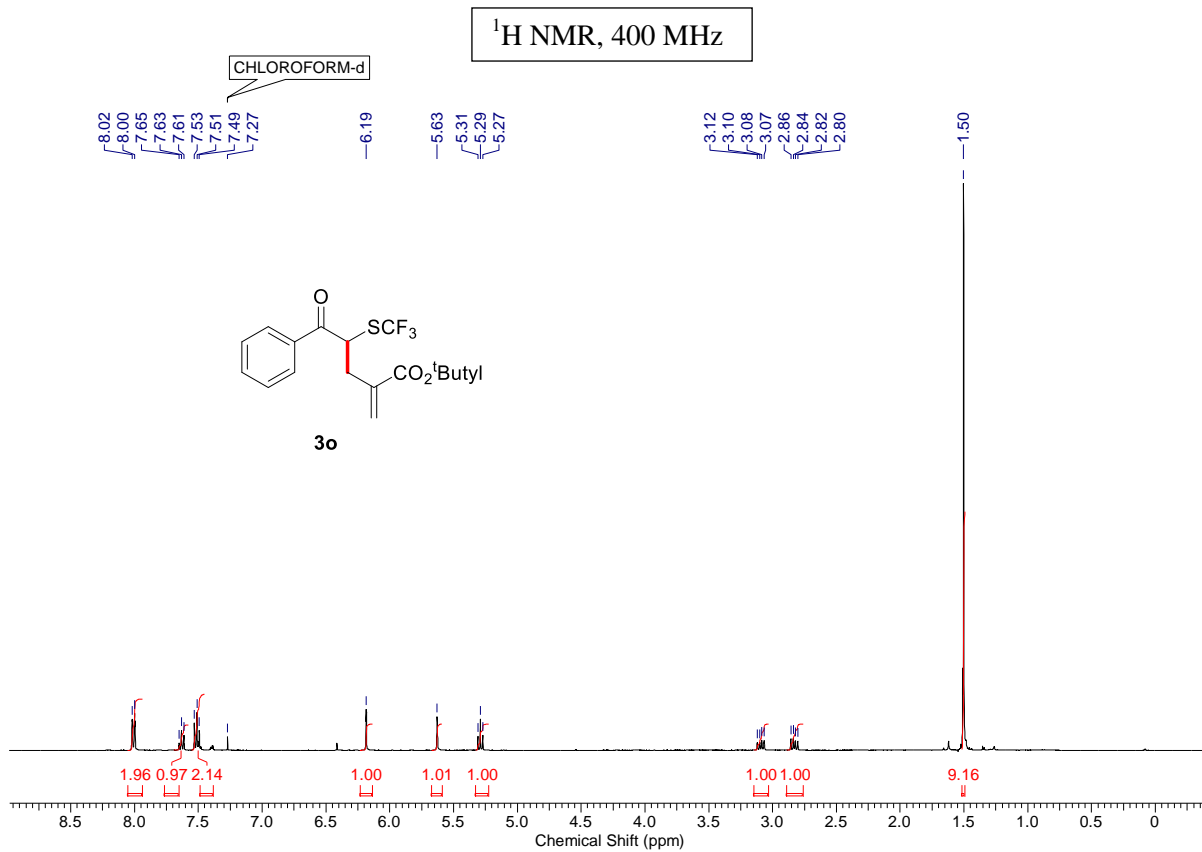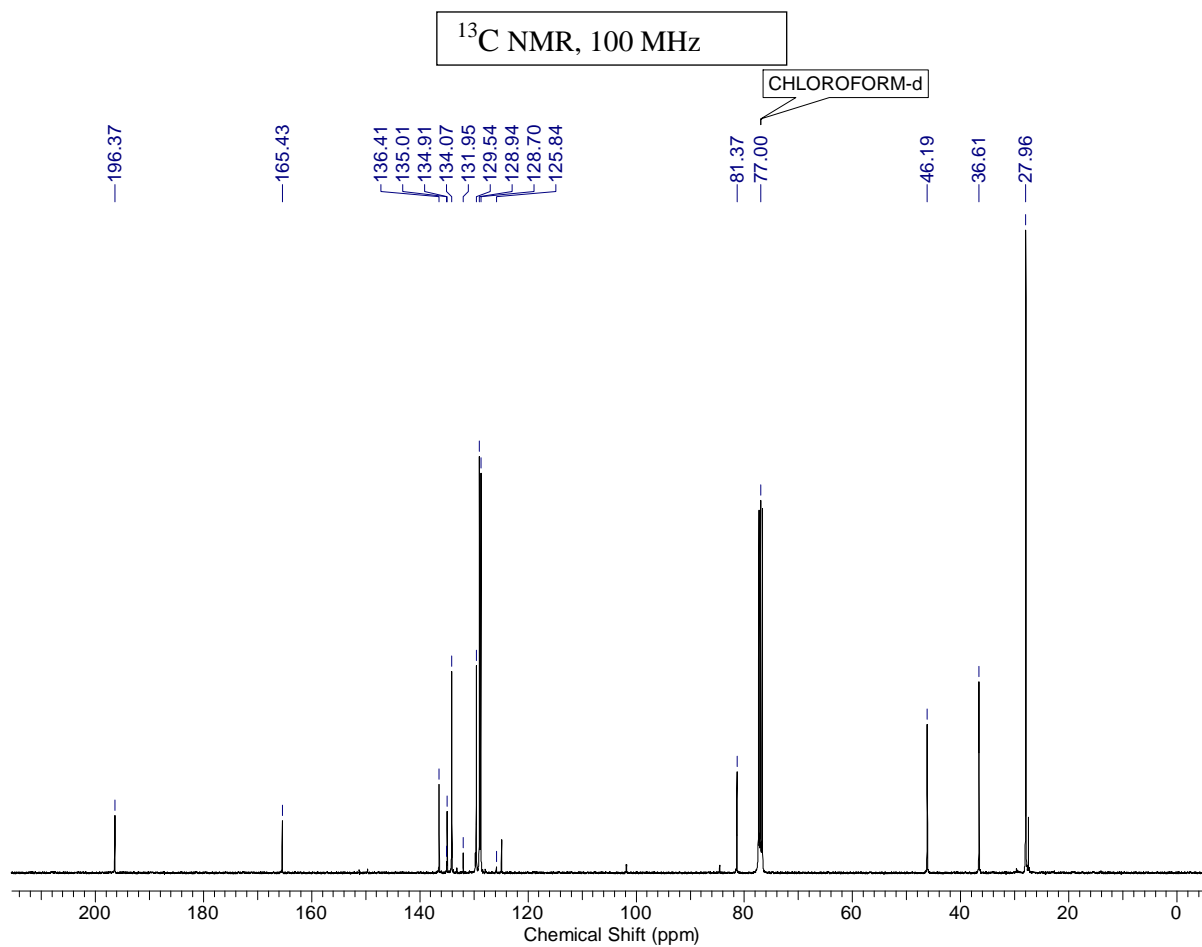

ESI-HRMS

BHA-15 #311 RT: 1.38 AV: 1 NL: 1.02E9  
T: FTMS + p ESI Full ms [100.0000-1500.0000]

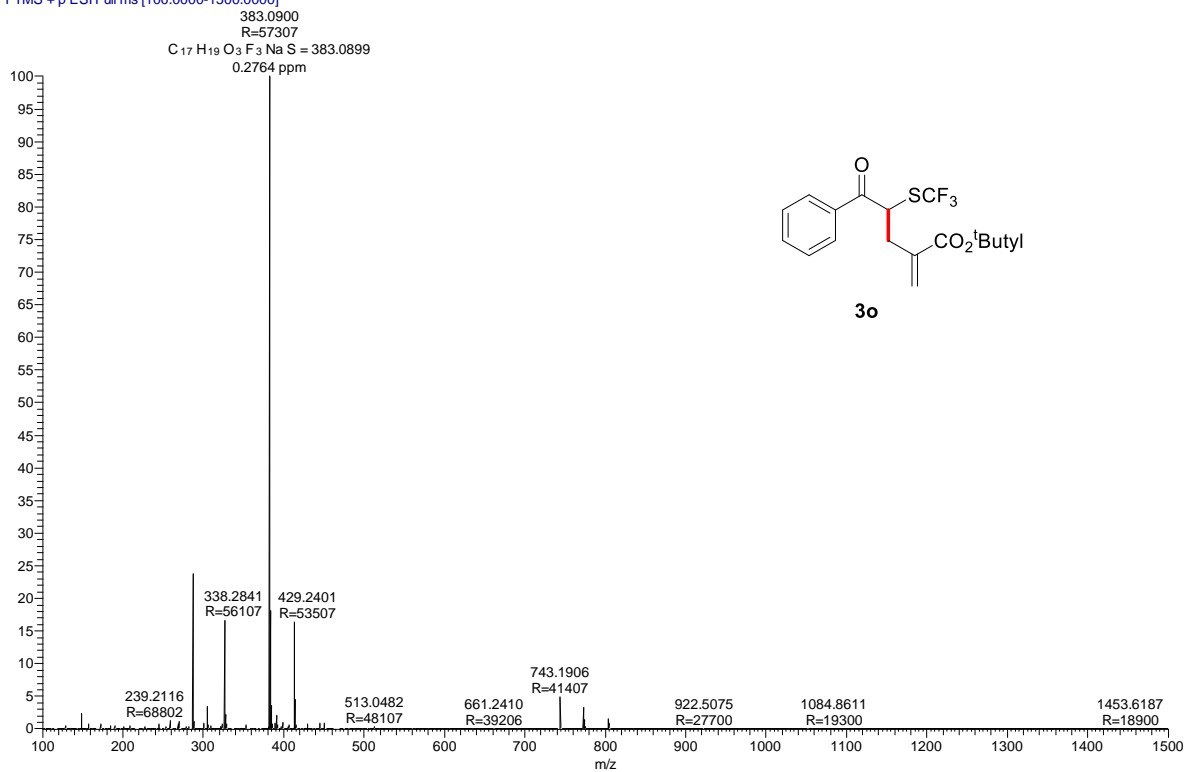

<sup>1</sup>H NMR, 400 MHz

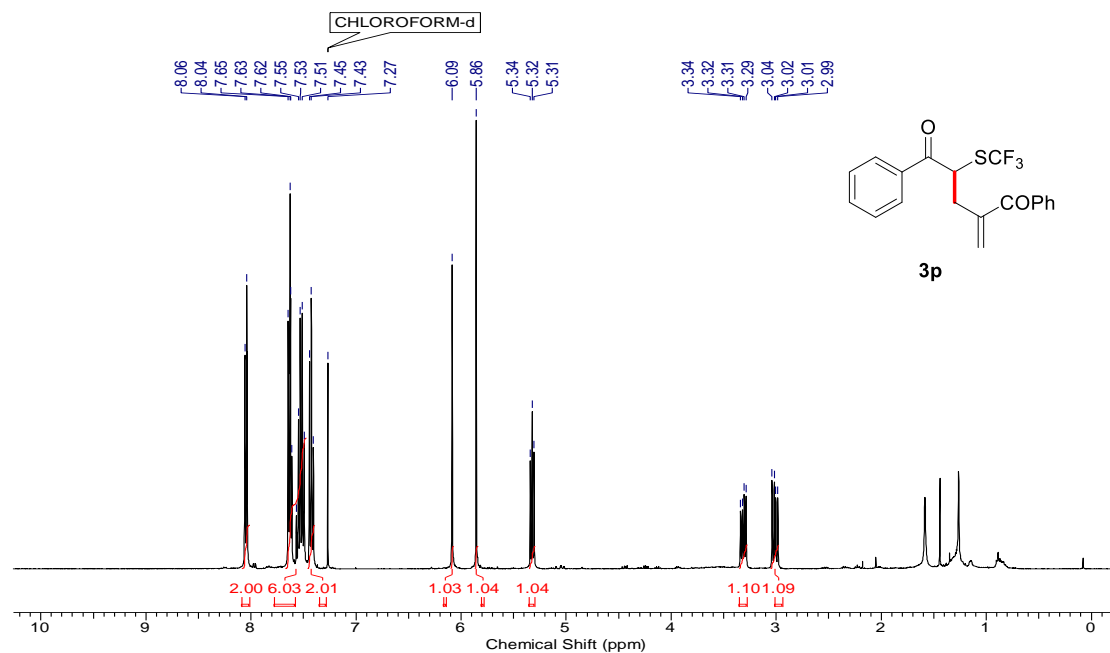

<sup>13</sup>C NMR, 100 MHz

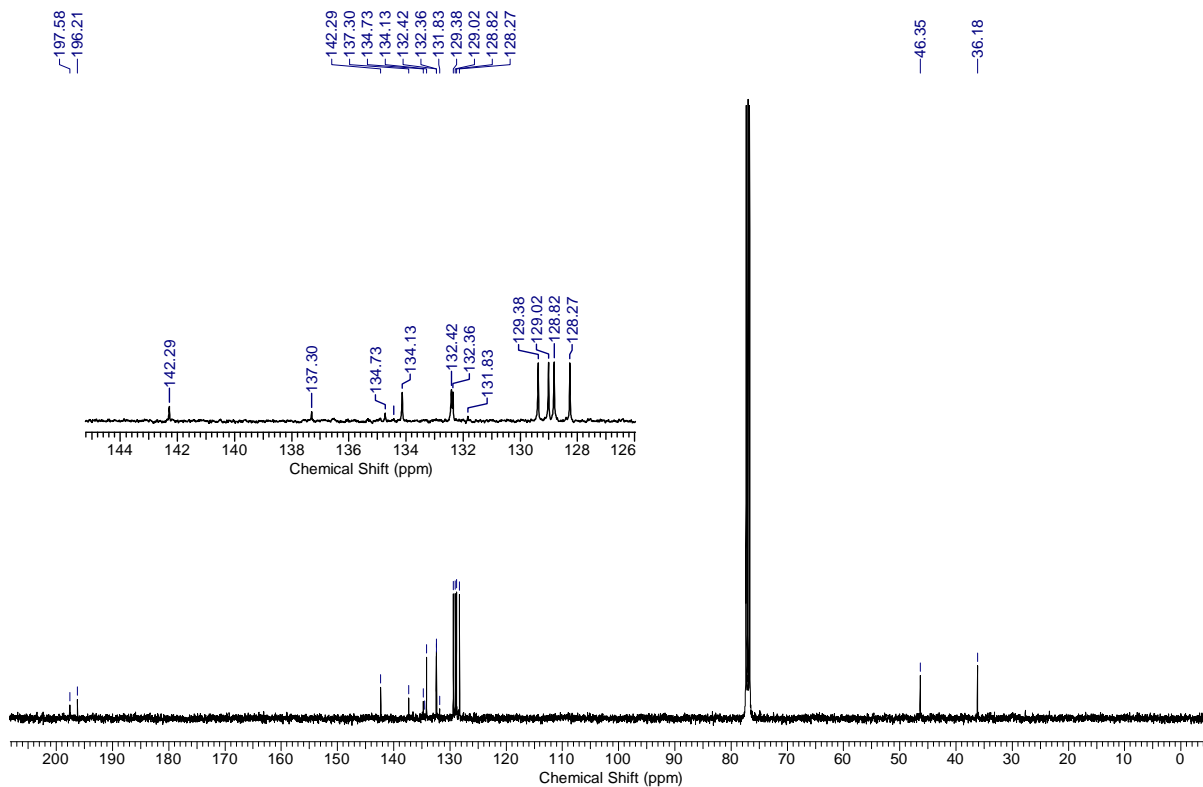

ESI-HRMS

SEF3-17 #276 RT: 1.23 AV: 1 NL: 2.59E8  
T: FTMS + p ESI Full ms [133.4000-2000.0000]

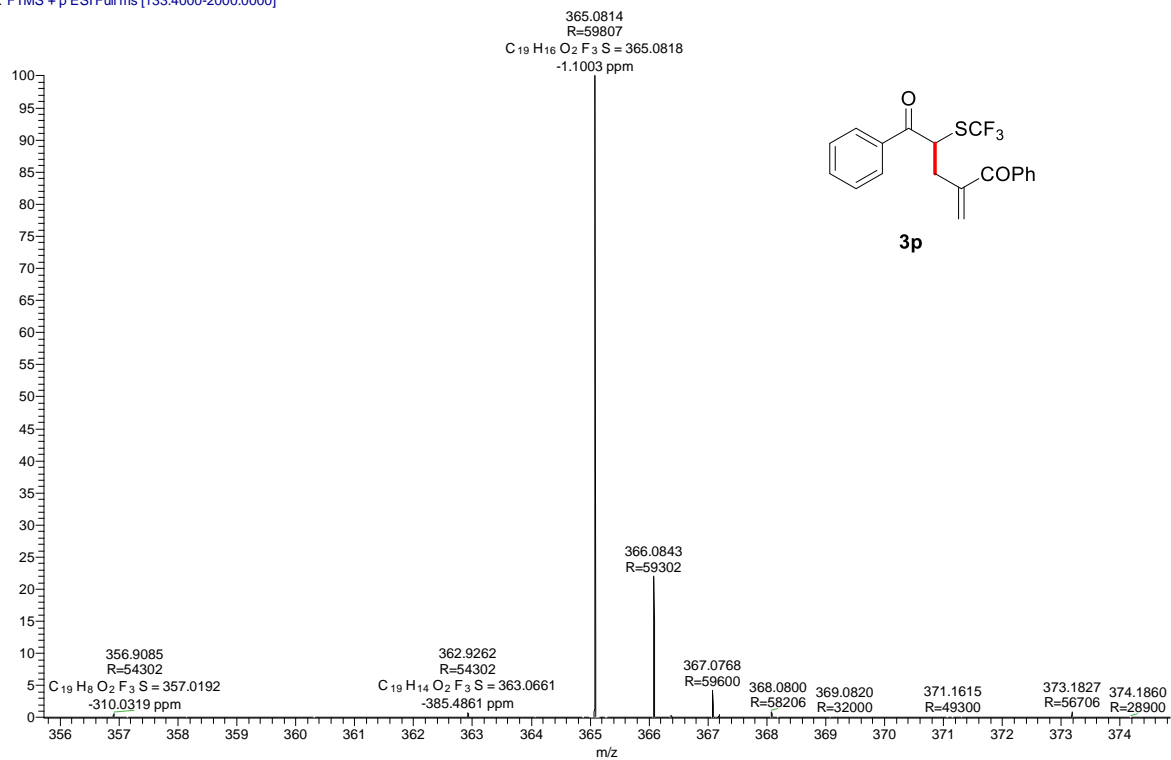

<sup>1</sup>H NMR, 400 MHz

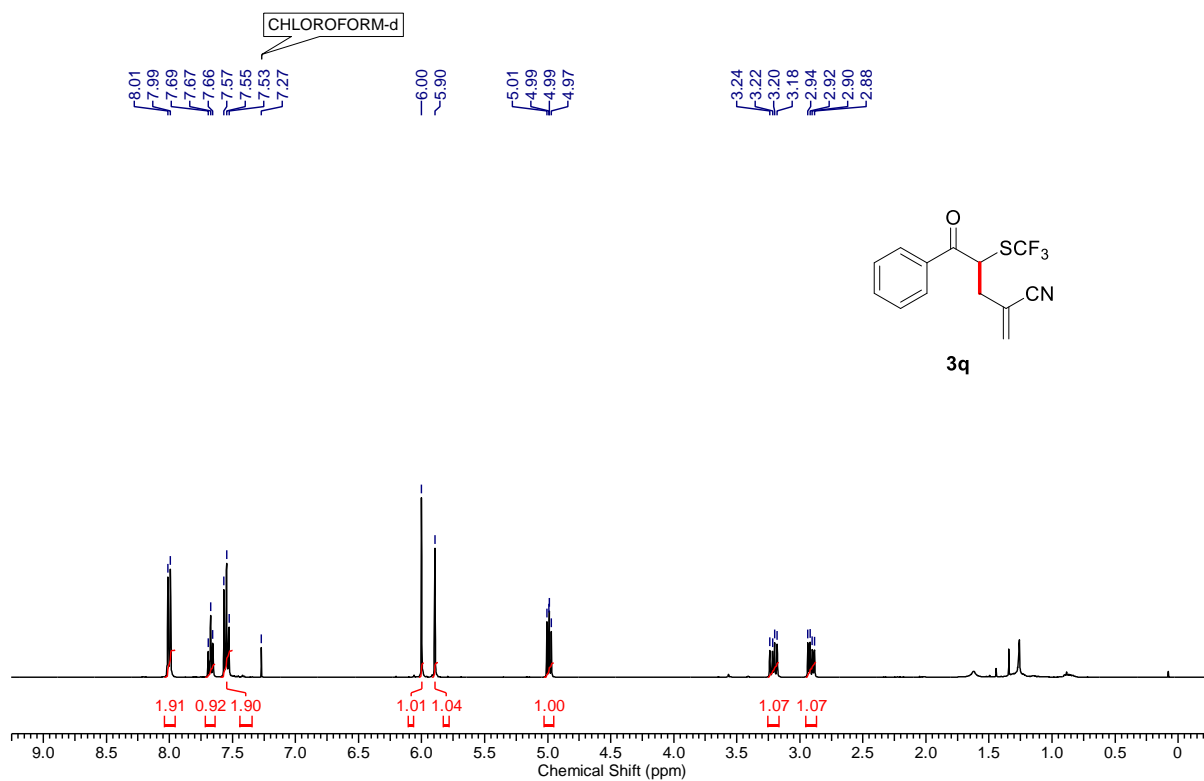

<sup>13</sup>C NMR, 100 MHz

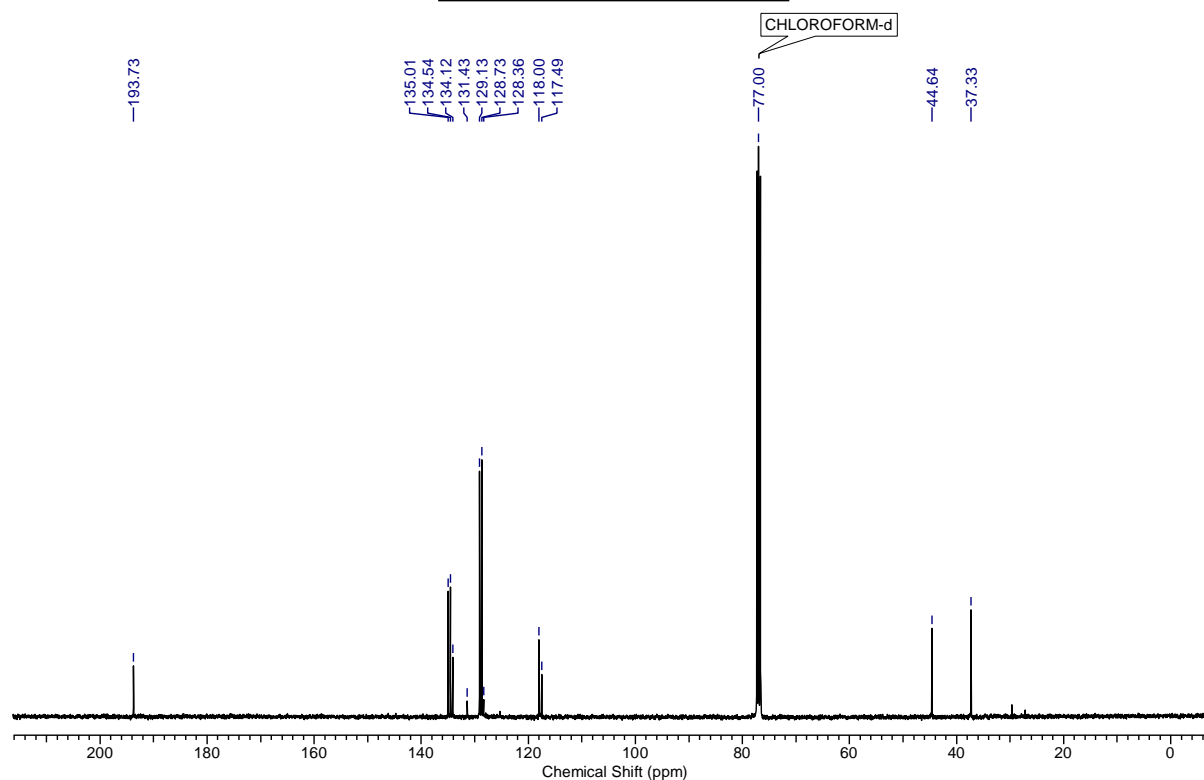



ESI-HRMS

SEF3-18 #248 RT: 1.10 AV: 1 NL: 1.51E6  
T: FTMS + p ESI Full ms [133.4000-2000.0000]

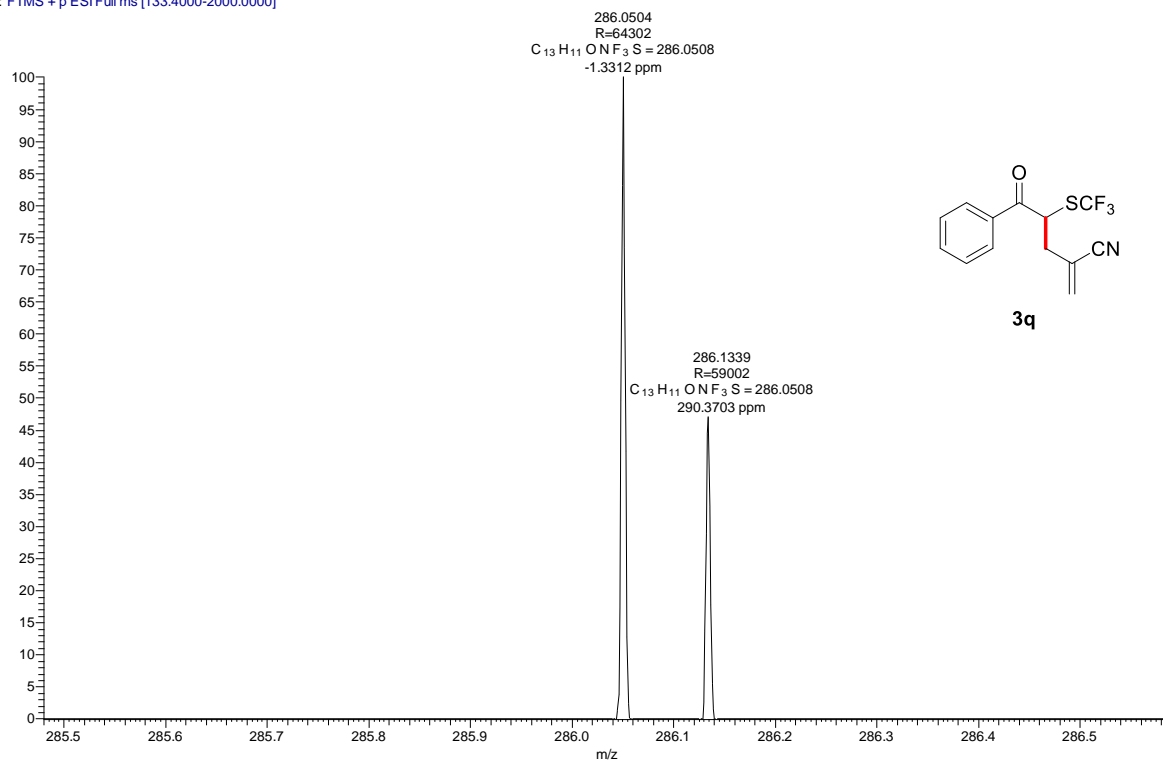

<sup>1</sup>H NMR, 400 MHz

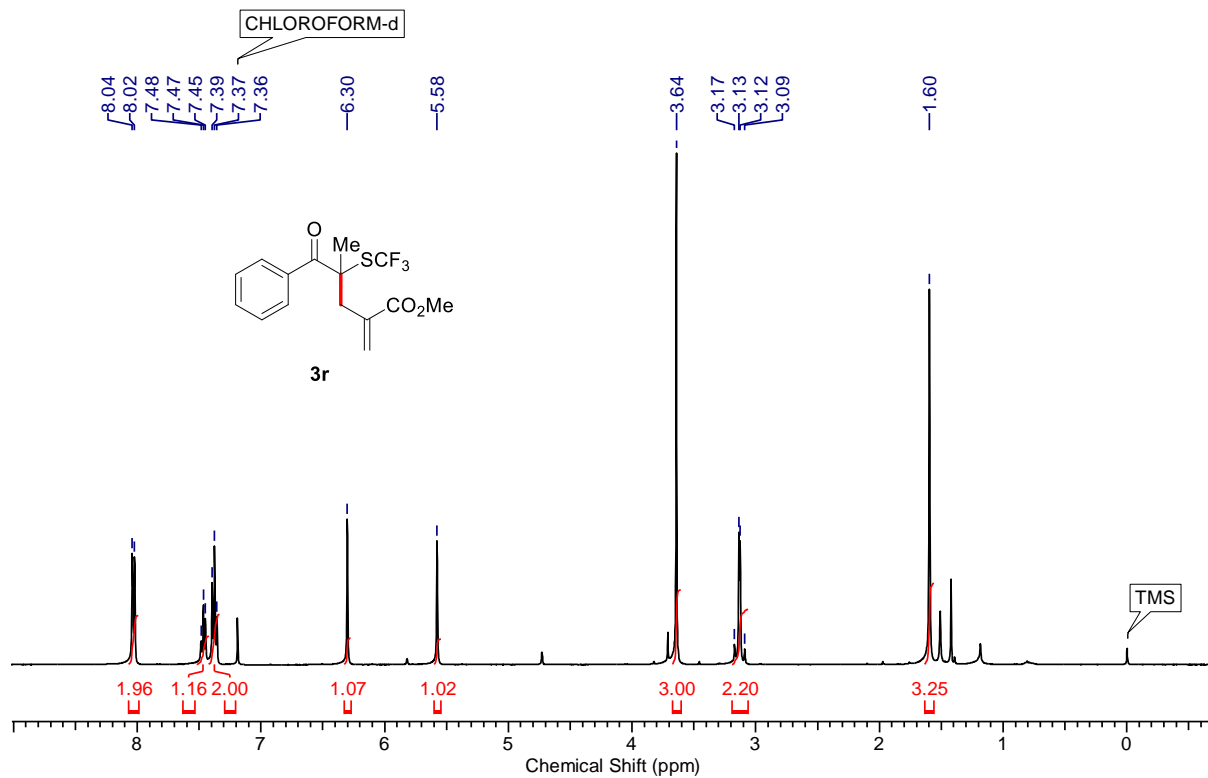

<sup>13</sup>C NMR, 100 MHz

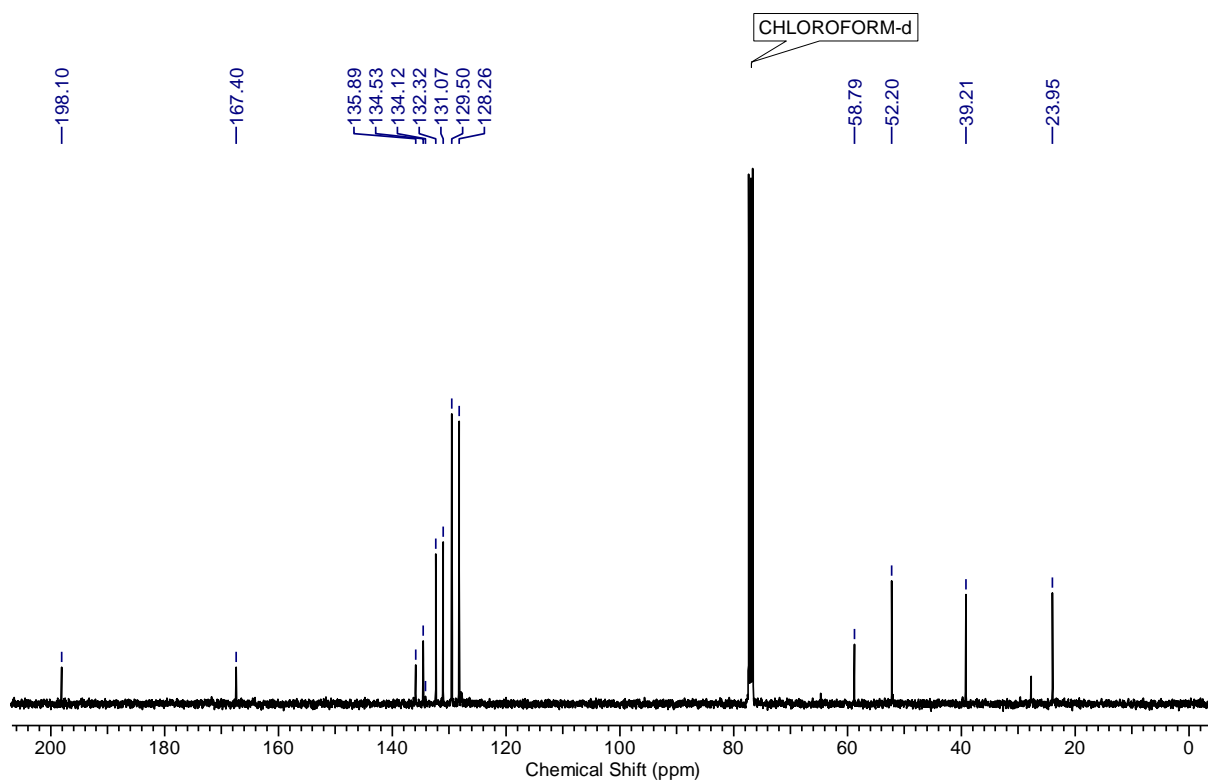

# ESI-HRMS

BHA-4 #297 RT: 1.32 AV: 1 NL: 2.01E9  
 T: FTMS + p ESI Full ms [100.0000-1500.0000]

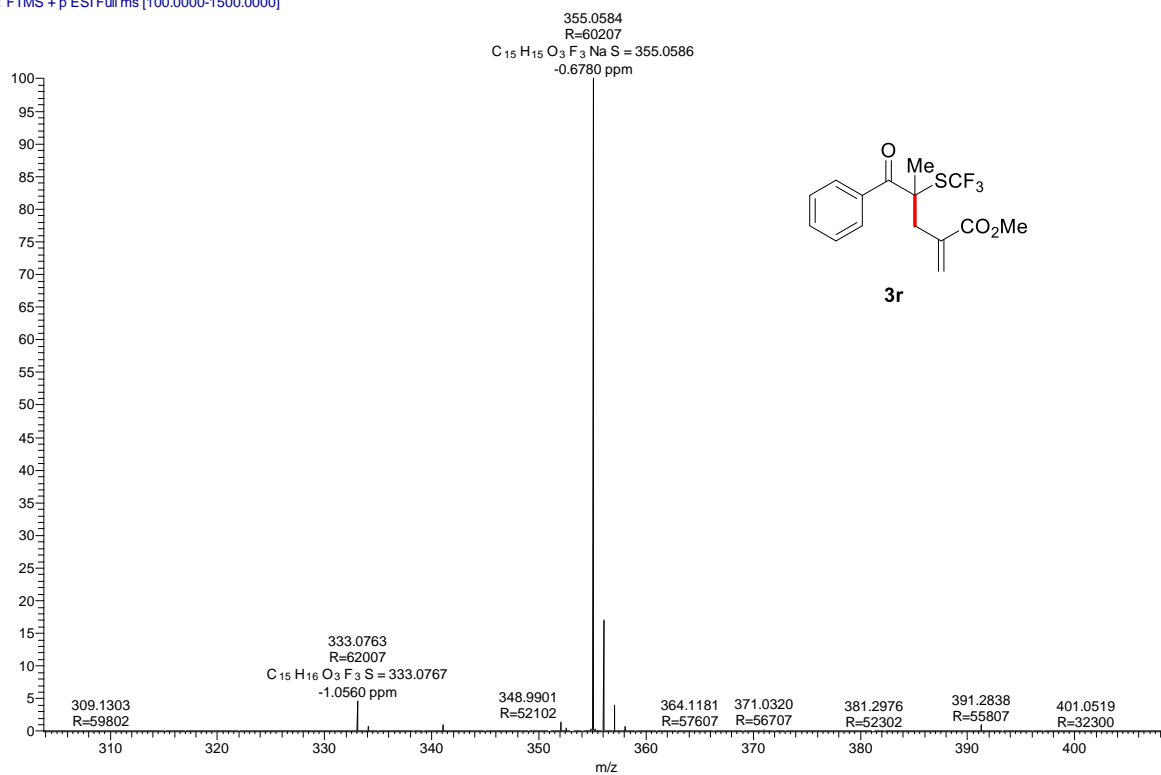

# HPLC

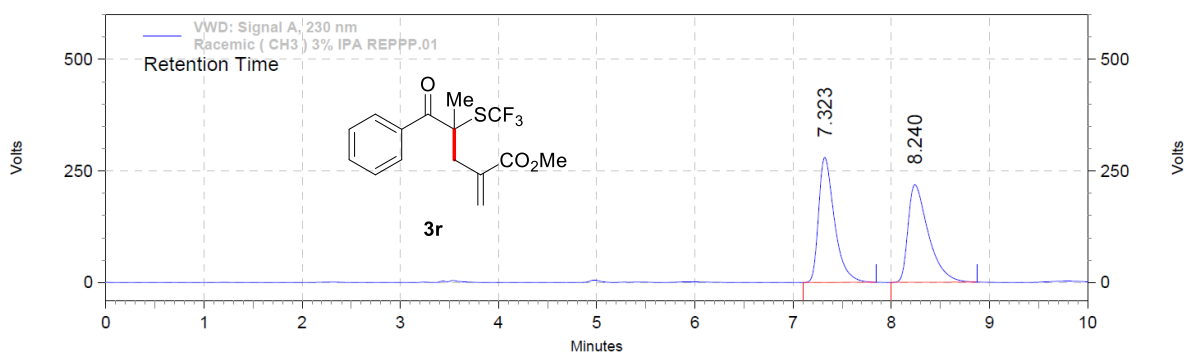

### VWD: Signal A, 230 nm Results

| Retention Time | Area     | Area % | Height  | Height % |
|----------------|----------|--------|---------|----------|
| 7.323          | 52743143 | 49.99  | 4696233 | 56.15    |
| 8.240          | 52770429 | 50.01  | 3667304 | 43.85    |

|        |           |        |         |        |
|--------|-----------|--------|---------|--------|
| Totals | 105513572 | 100.00 | 8363537 | 100.00 |
|--------|-----------|--------|---------|--------|

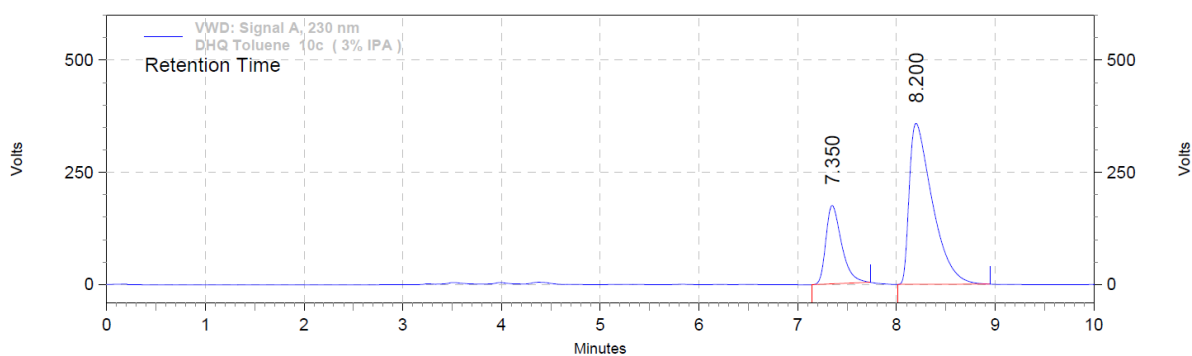

### VWD: Signal A, 230 nm Results

| Retention Time | Area     | Area % | Height  | Height % |
|----------------|----------|--------|---------|----------|
| 7.350          | 32428607 | 24.93  | 2931492 | 32.76    |
| 8.200          | 97657369 | 75.07  | 6017369 | 67.24    |

|        |           |        |         |        |
|--------|-----------|--------|---------|--------|
| Totals | 130085976 | 100.00 | 8948861 | 100.00 |
|--------|-----------|--------|---------|--------|

<sup>1</sup>H NMR, 400 MHz

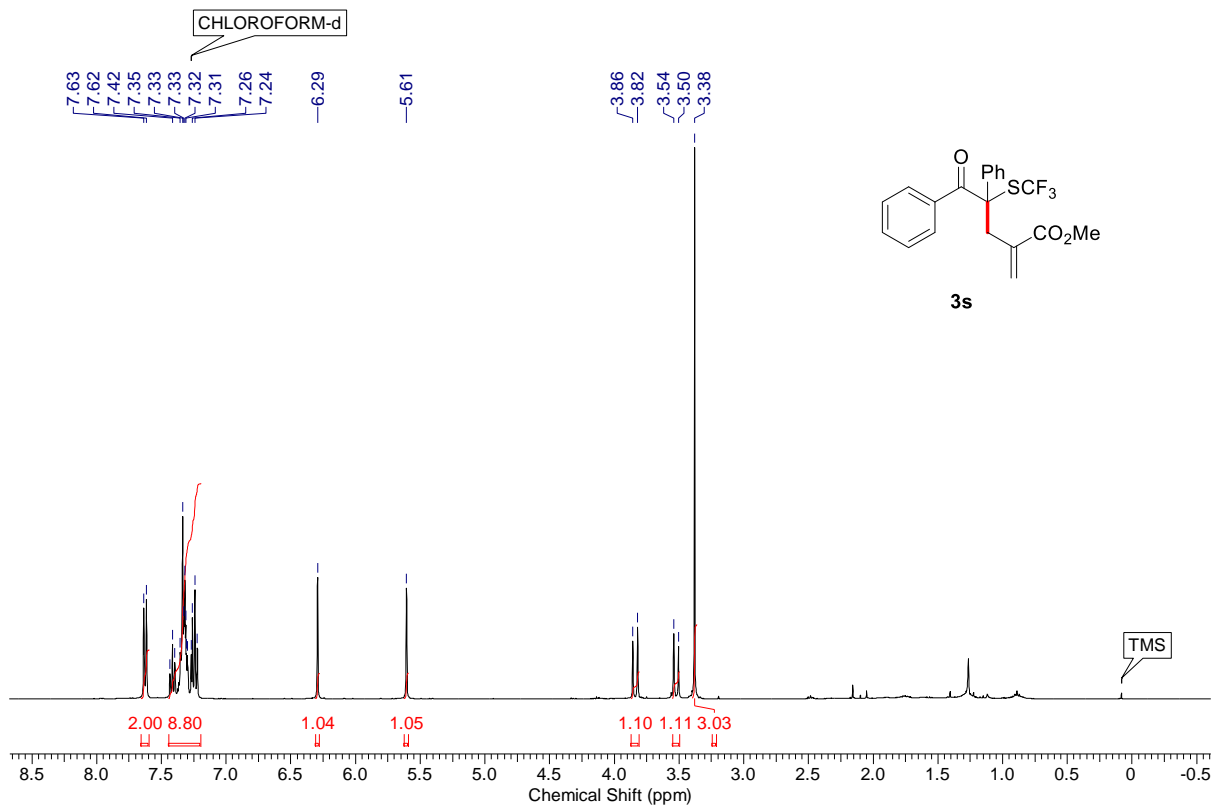

<sup>13</sup>C NMR, 100 MHz

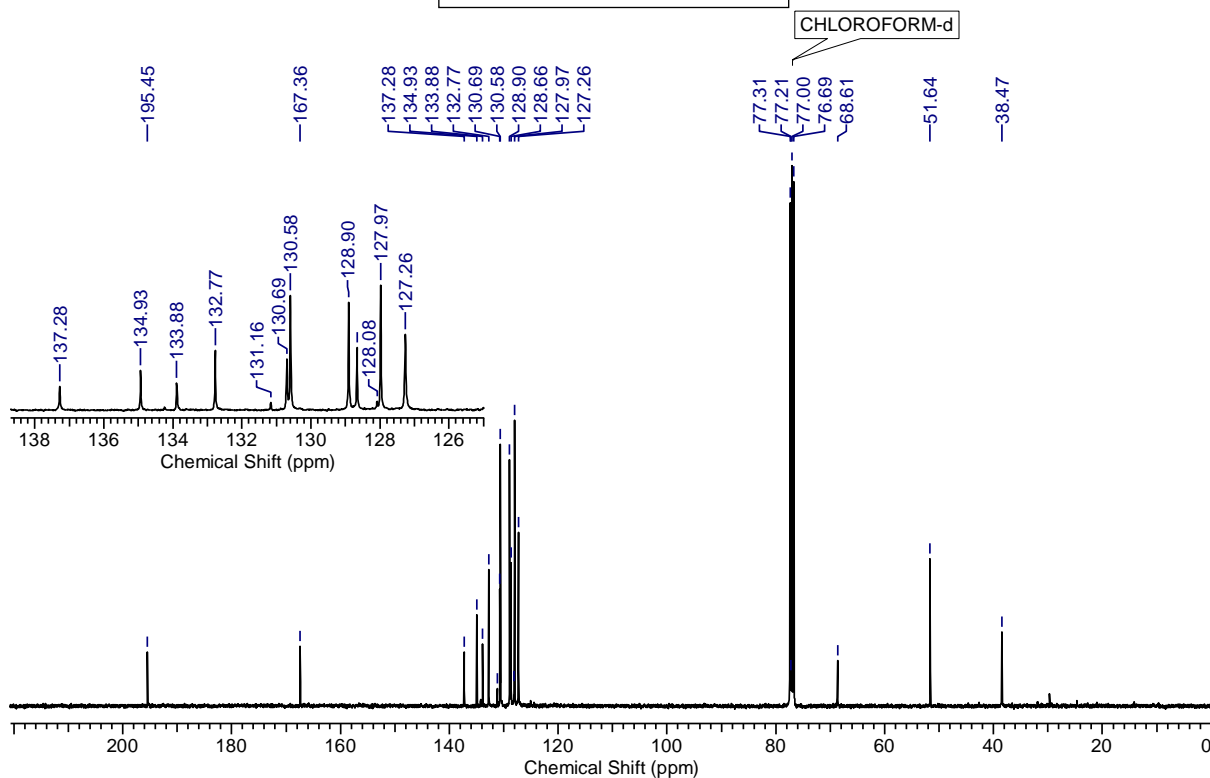

# ESI-HRMS

SeF3-3 #310 RT: 1.84 AV: 1 NL: 4.95E8  
 T: FTMS + p ESI Full ms [100.0000-1500.0000]

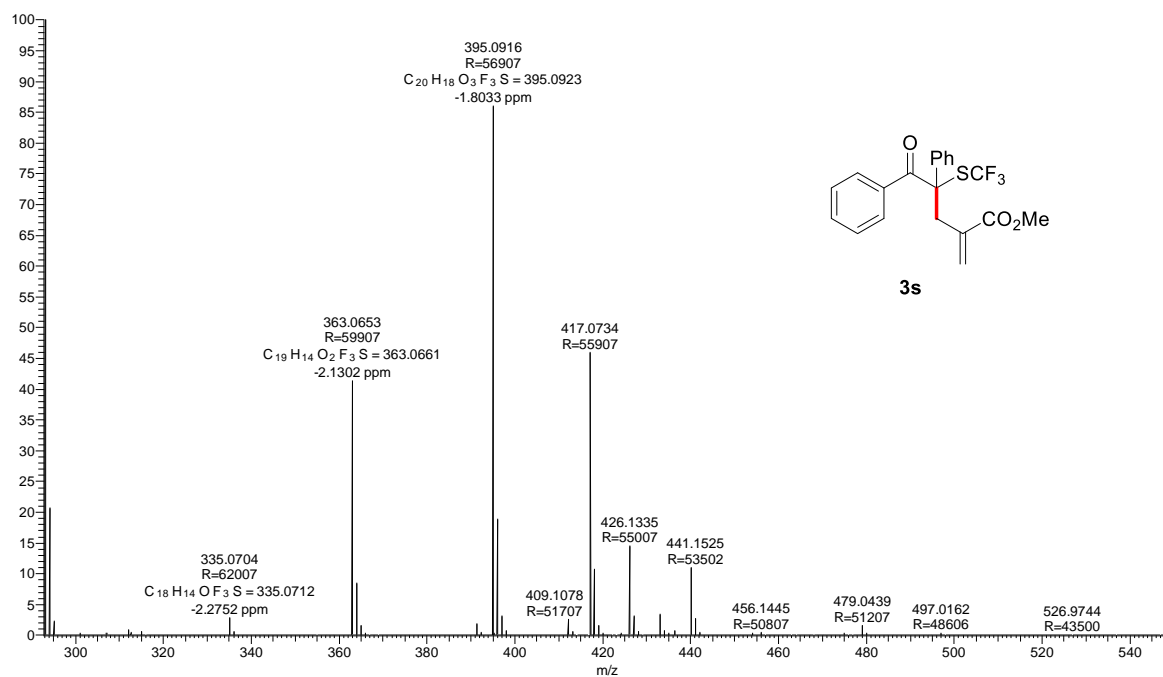

<sup>1</sup>H NMR, 400 MHz

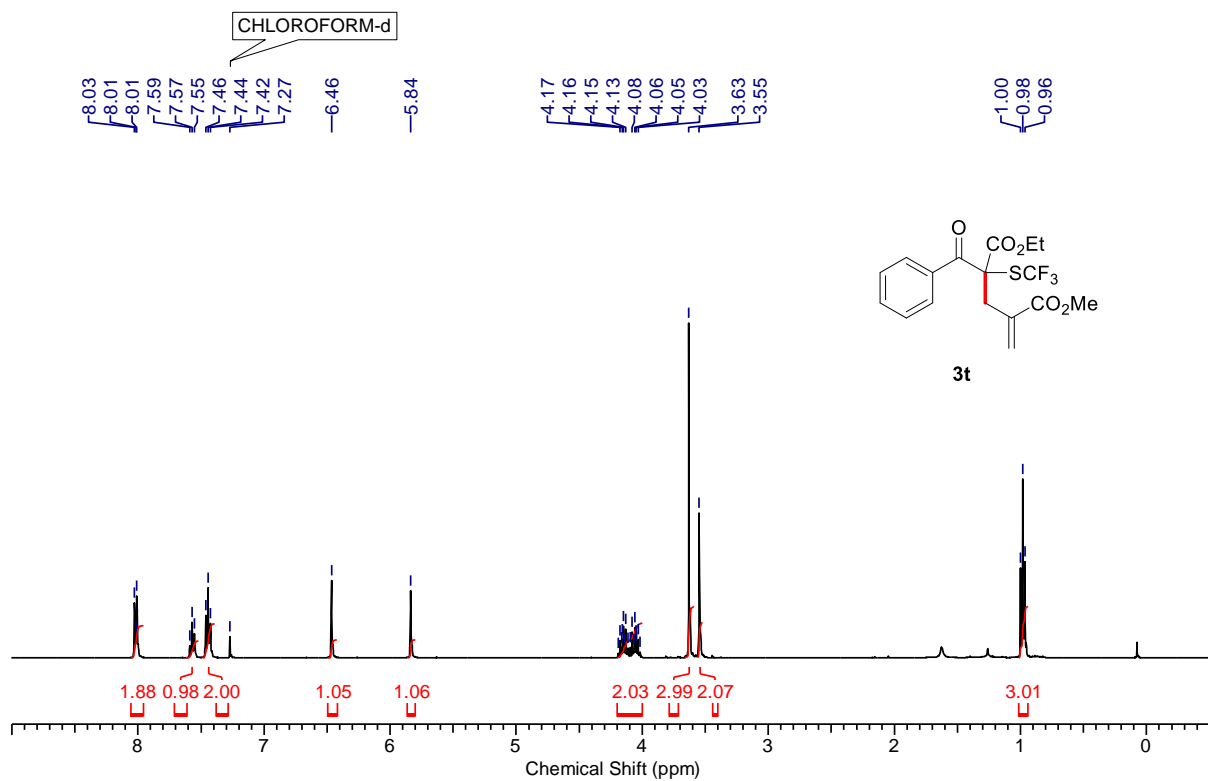

<sup>13</sup>C NMR, 100 MHz

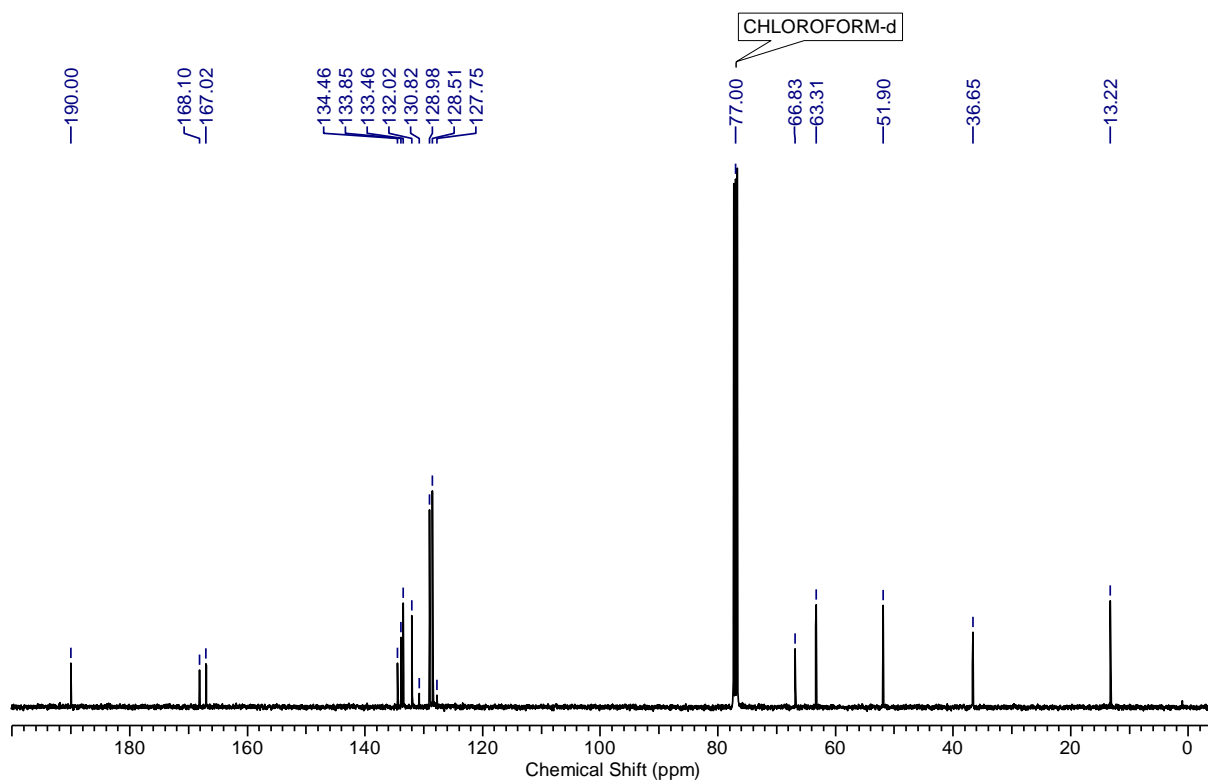

ESI-HRMS

SeF3-4 #285 RT: 1.72 AV: 1 NL: 8.15E8  
T: FTMS + p ESI Full ms [100.0000-1500.0000]

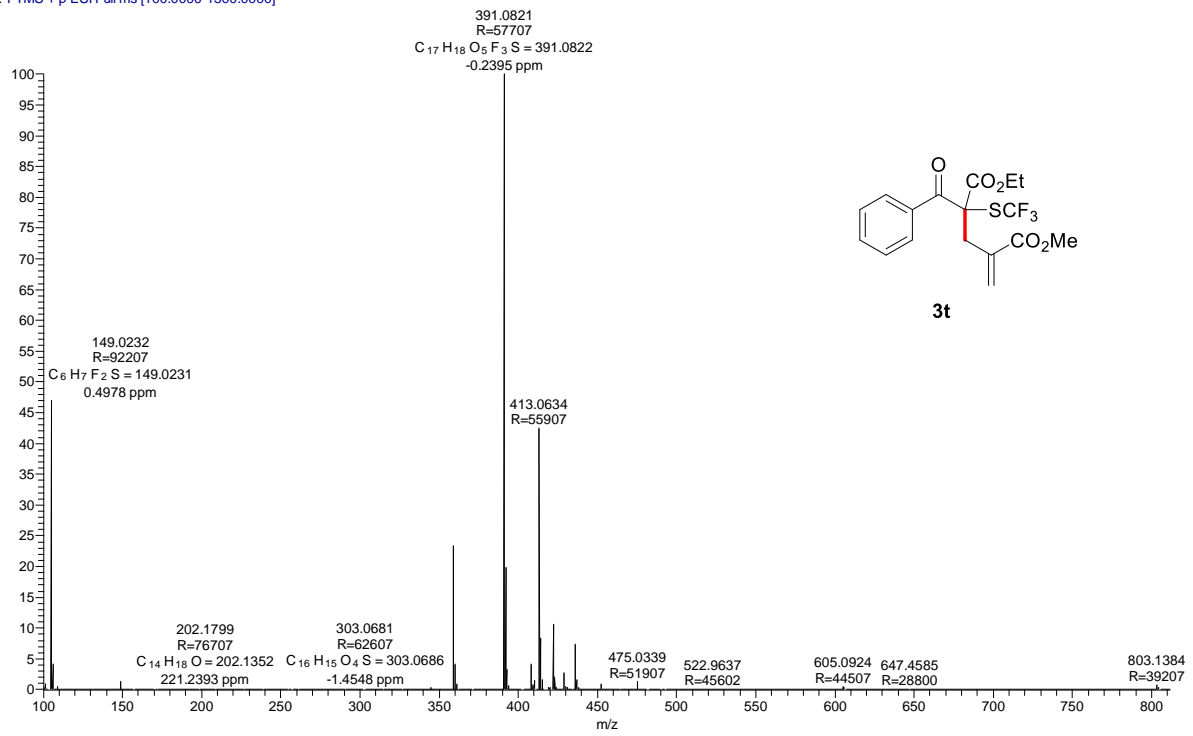



<sup>1</sup>H NMR, 400 MHz

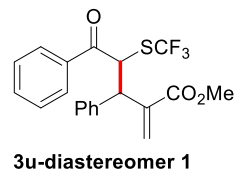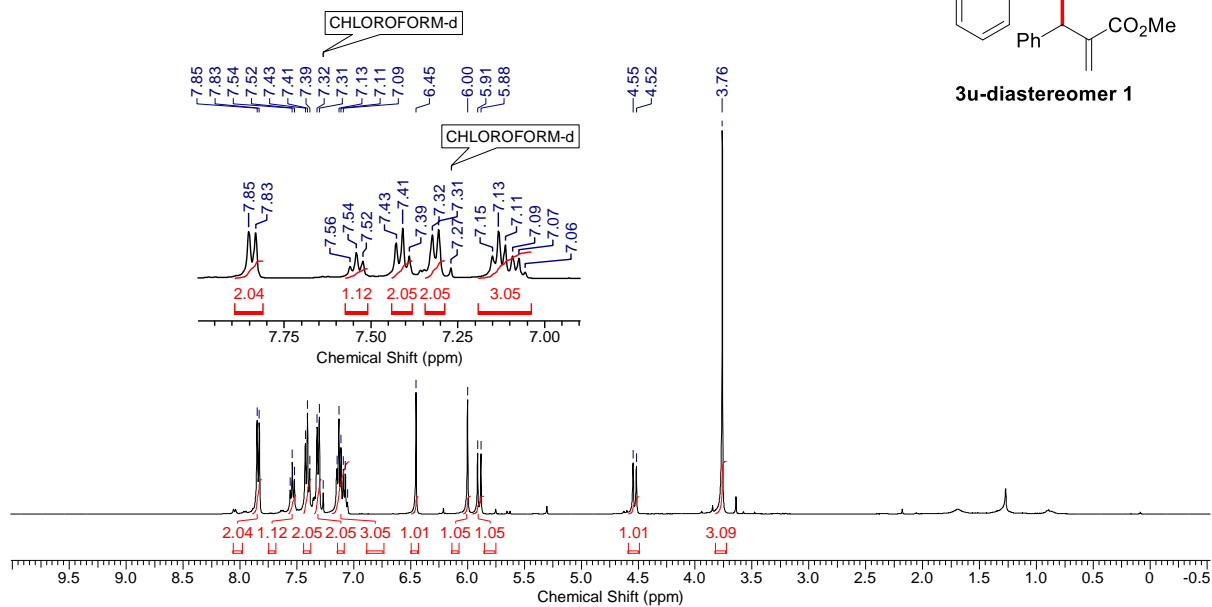

<sup>13</sup>C NMR, 100 MHz

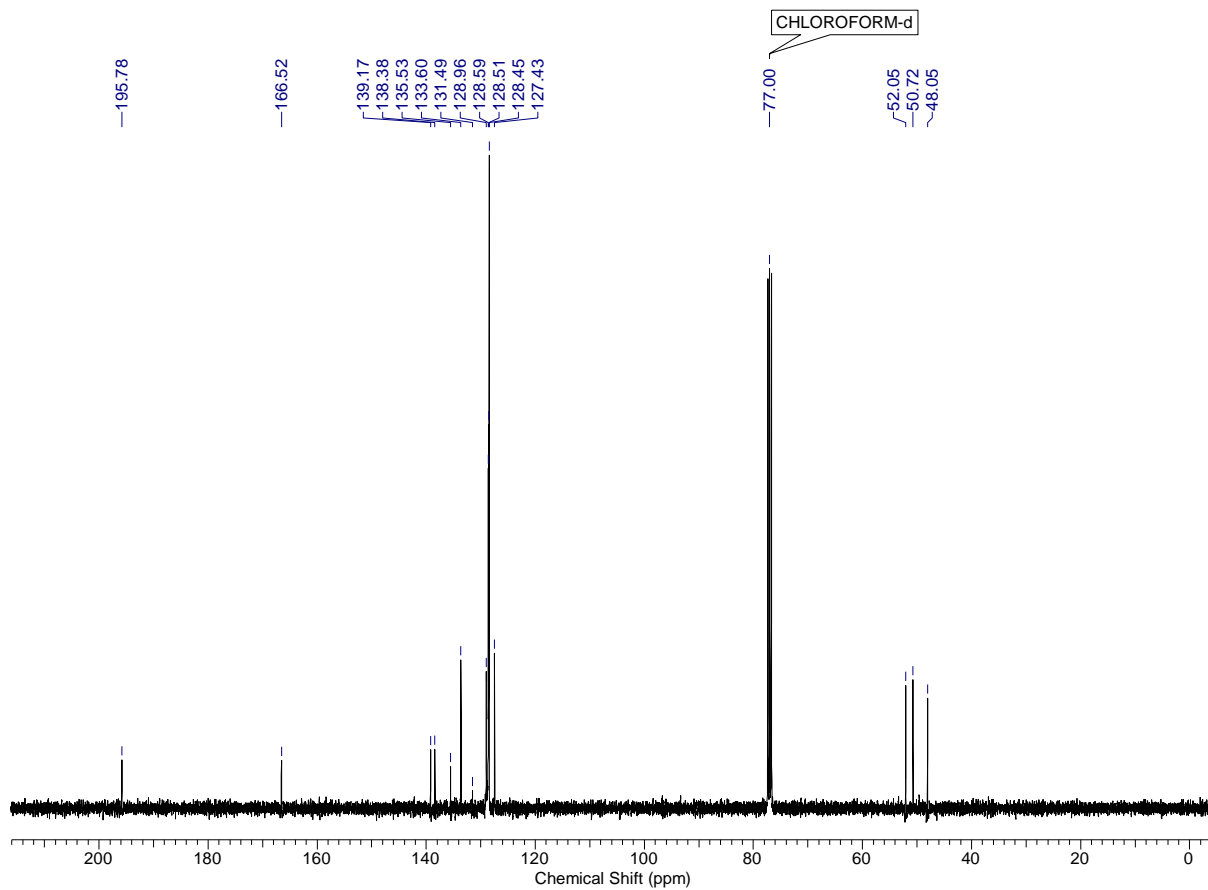

ESI-HRMS

SEF3-19 #268 RT: 1.19 AV: 1 NL: 1.38E7  
T: FTMS + p ESI Full ms [133.4000-2000.0000]

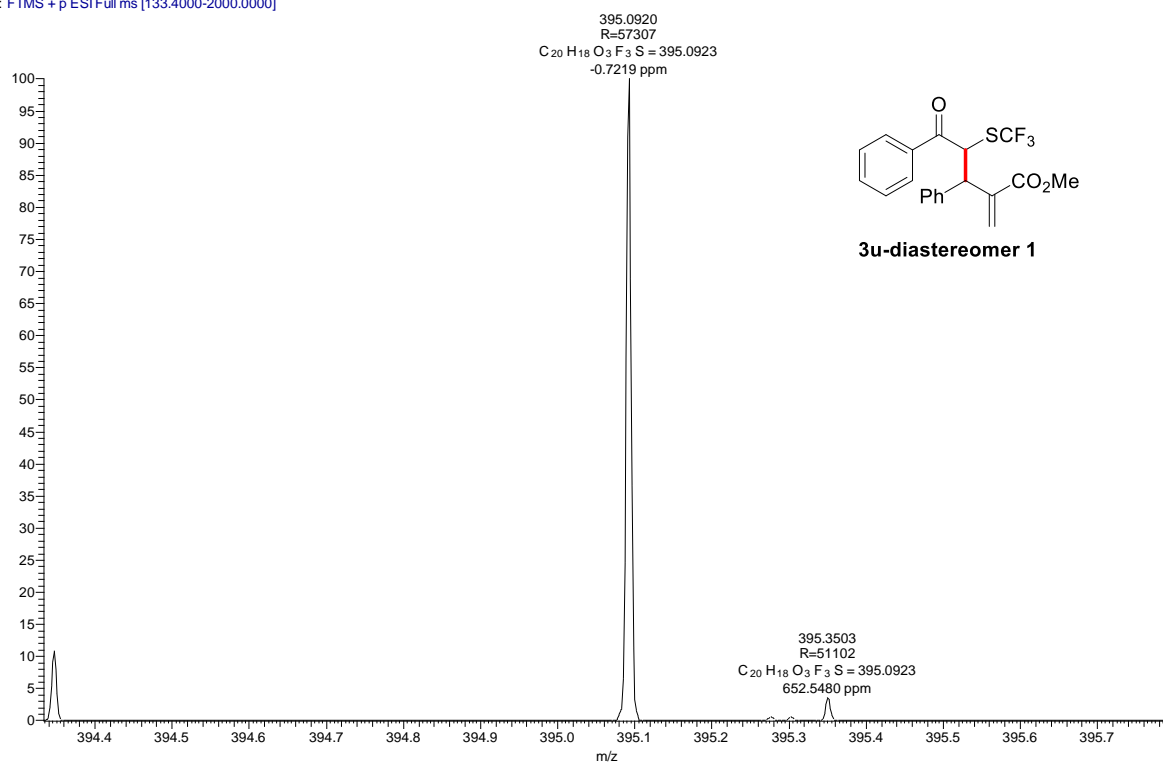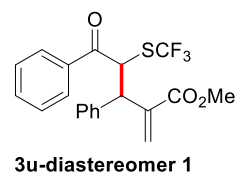

<sup>1</sup>H NMR, 400 MHz

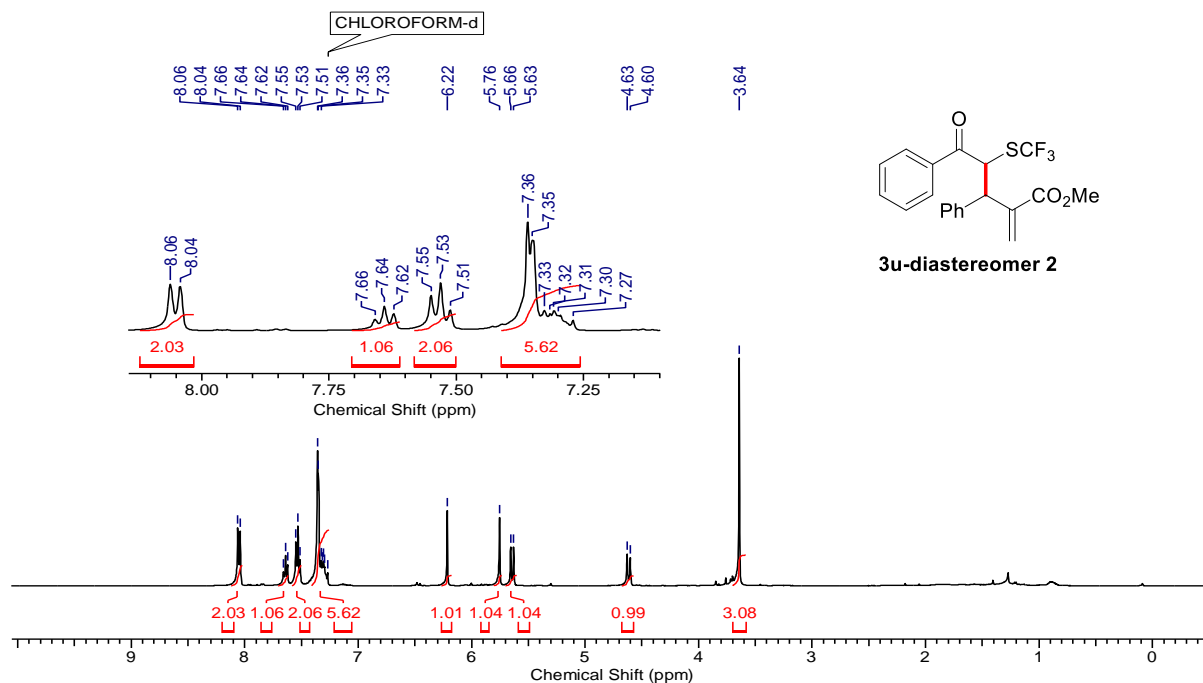

<sup>13</sup>C NMR, 100 MHz

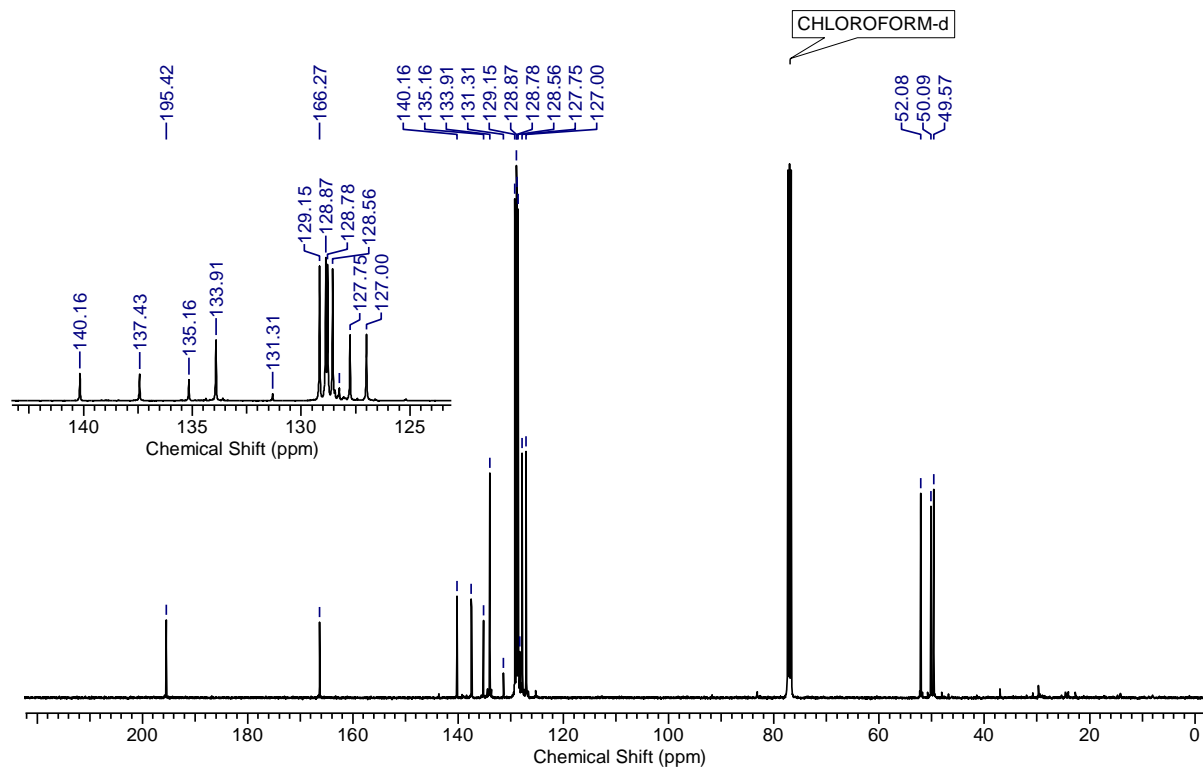

ESI-HRMS

SEF3-19II #278 RT: 1.24 AV: 1 NL: 3.09E7  
T: FTMS + p ESI Full ms [133.4000-2000.0000]

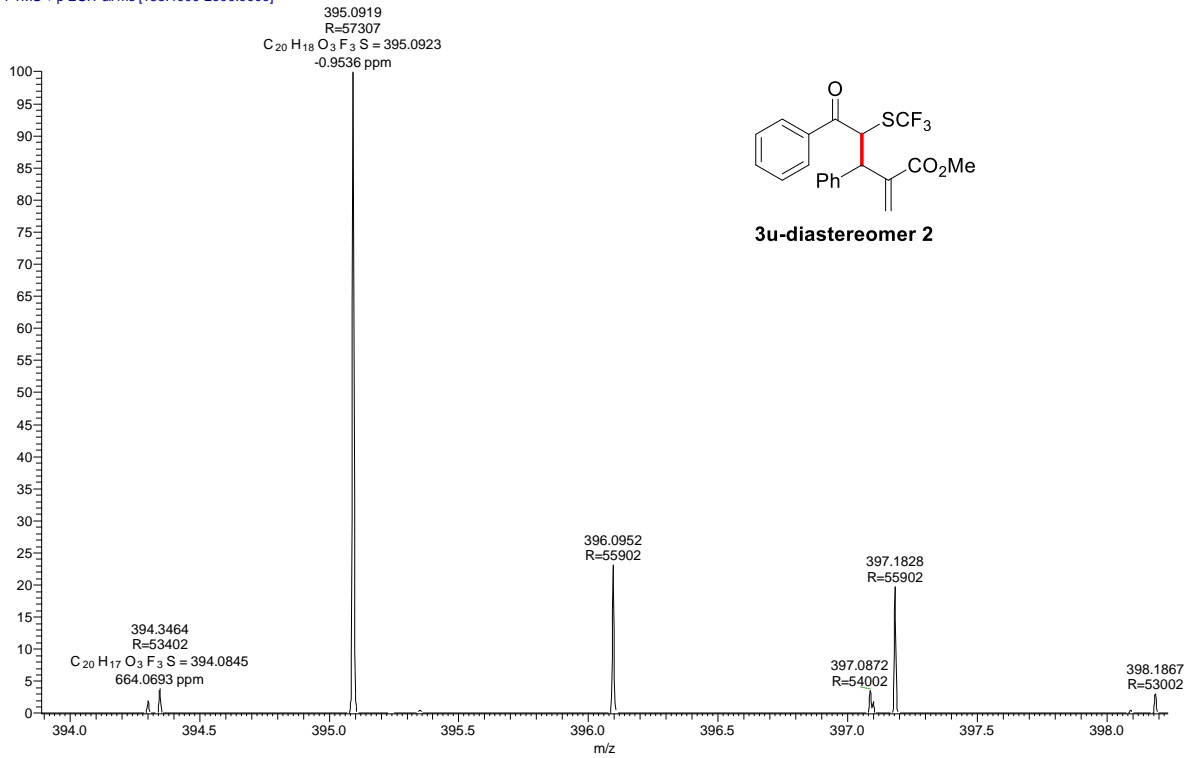

<sup>1</sup>H NMR, 400 MHz

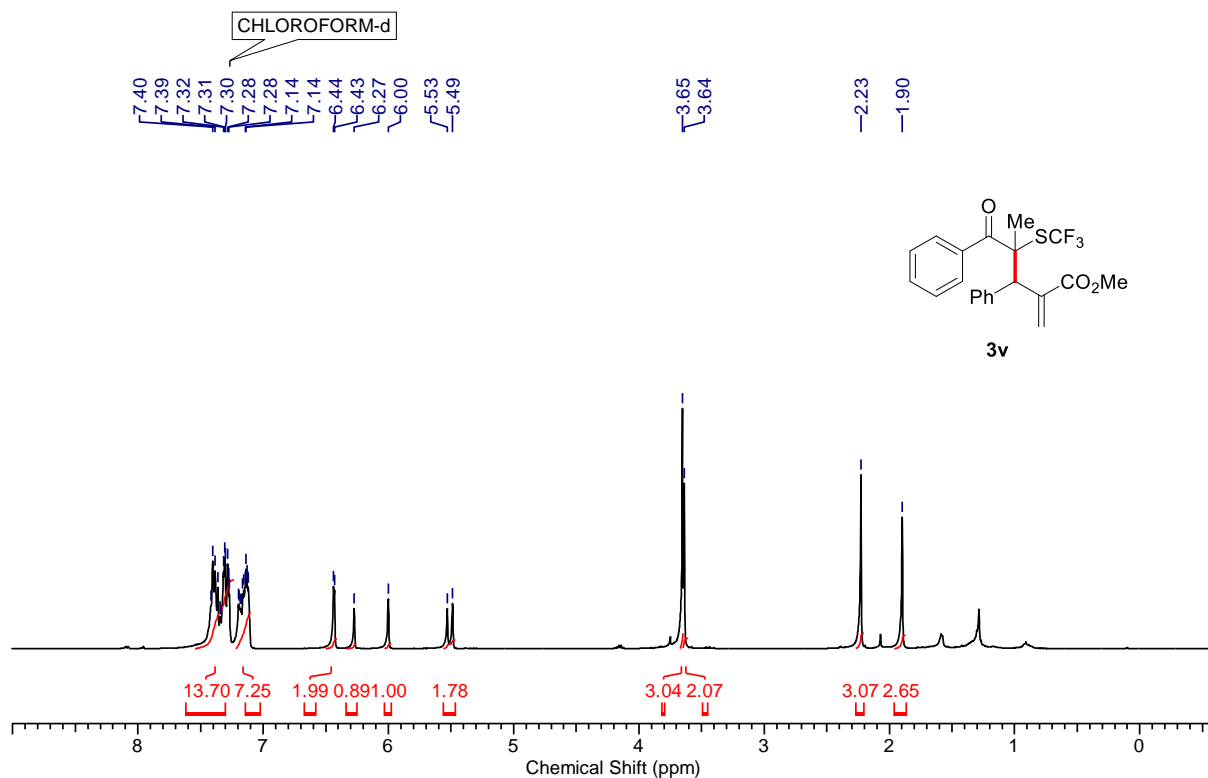

<sup>13</sup>C NMR, 100 MHz

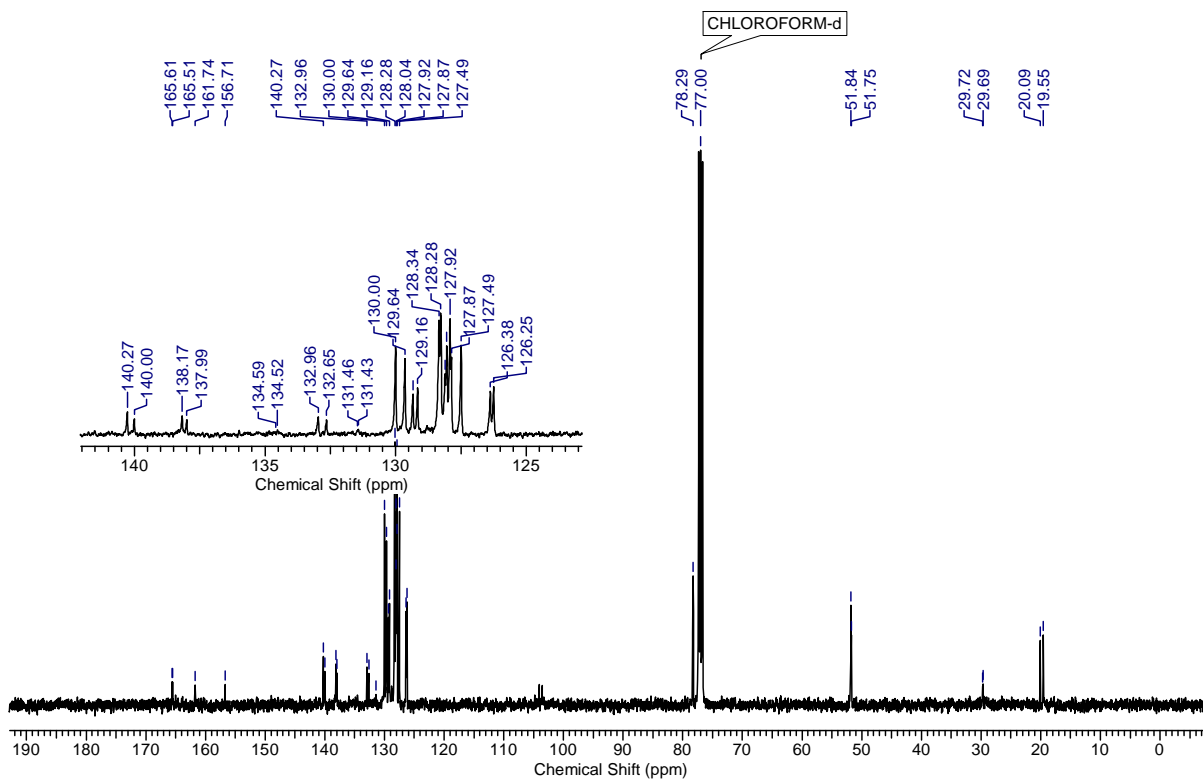

ESI-HRMS

SEF3-20 #313 RT: 1.39 AV: 1 NL: 2.60E6  
T: FTMS + p ESI Full ms [133.4000-2000.0000]

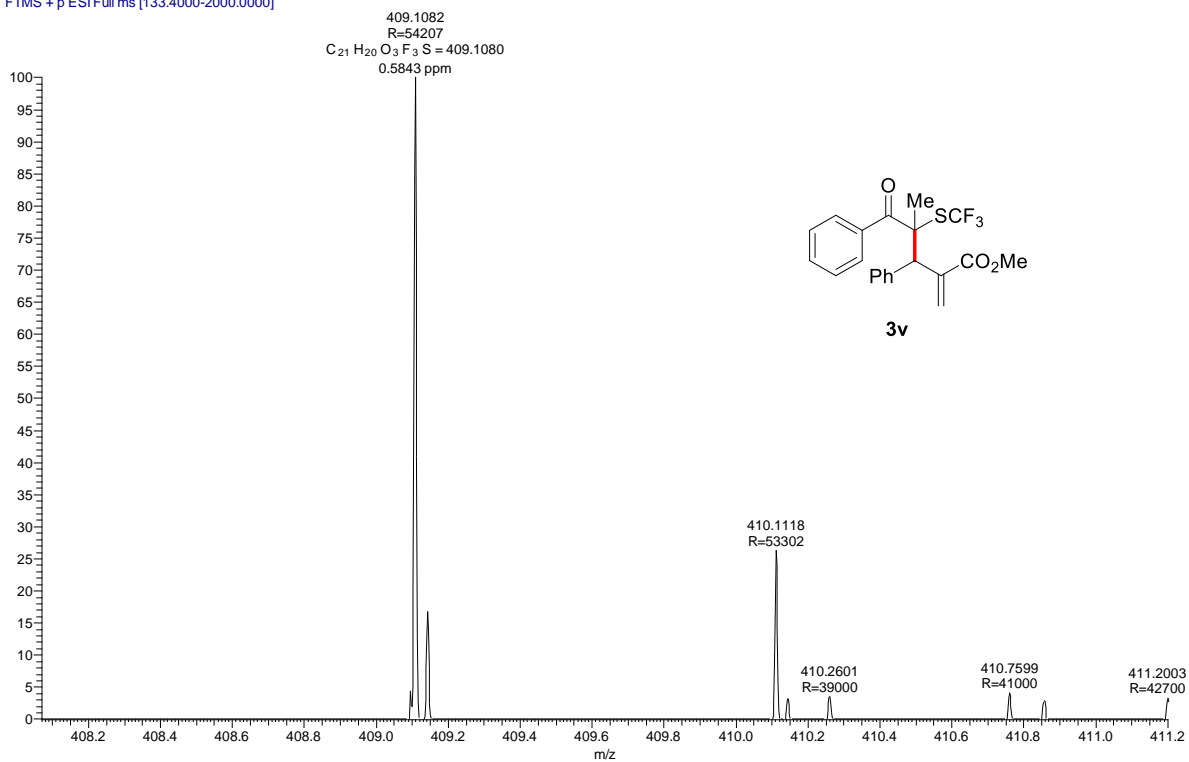

<sup>1</sup>H NMR, 400 MHz

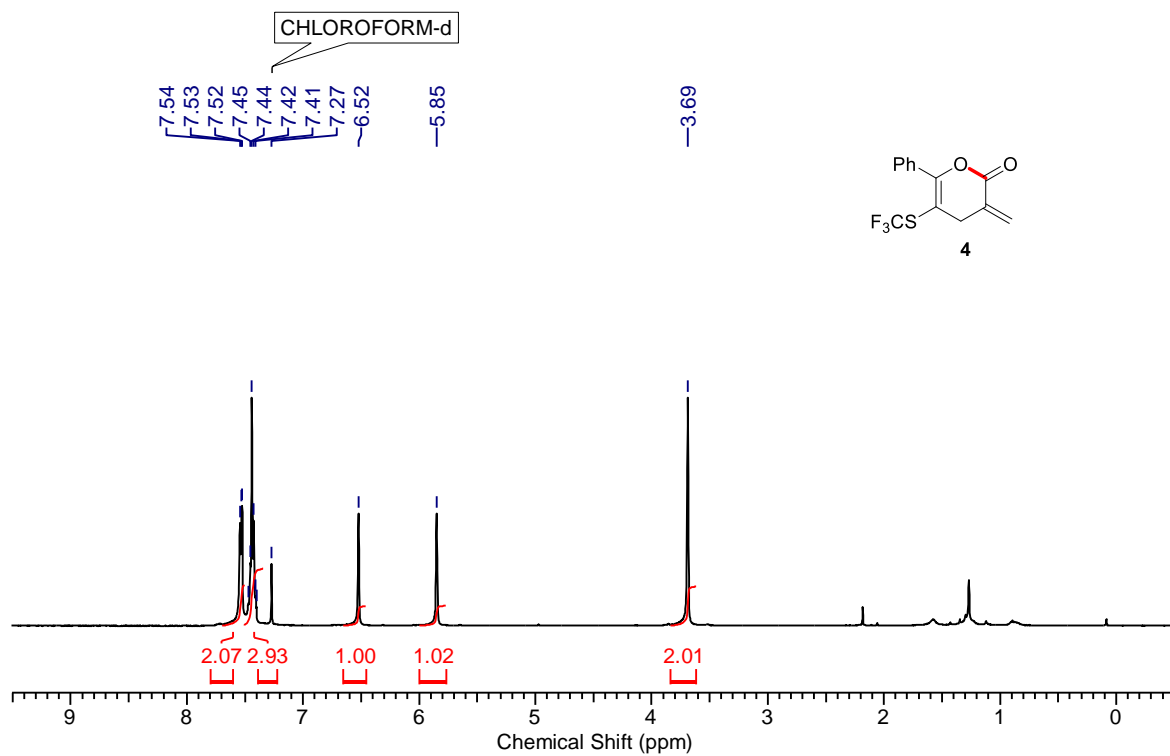

<sup>13</sup>C NMR, 100 MHz

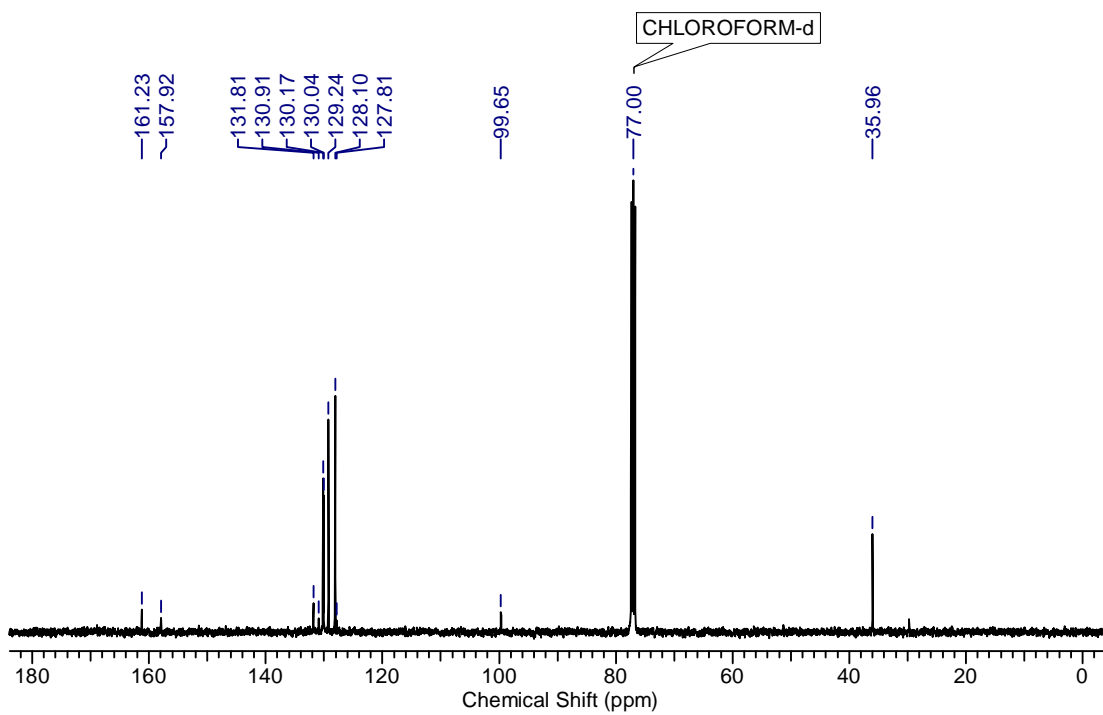

ESI-HRMS

SeF3-6 #262 RT: 1.59 AV: 1 NL: 8.47E6  
T: FTMS + p ESI Full ms [100.0000-1500.0000]

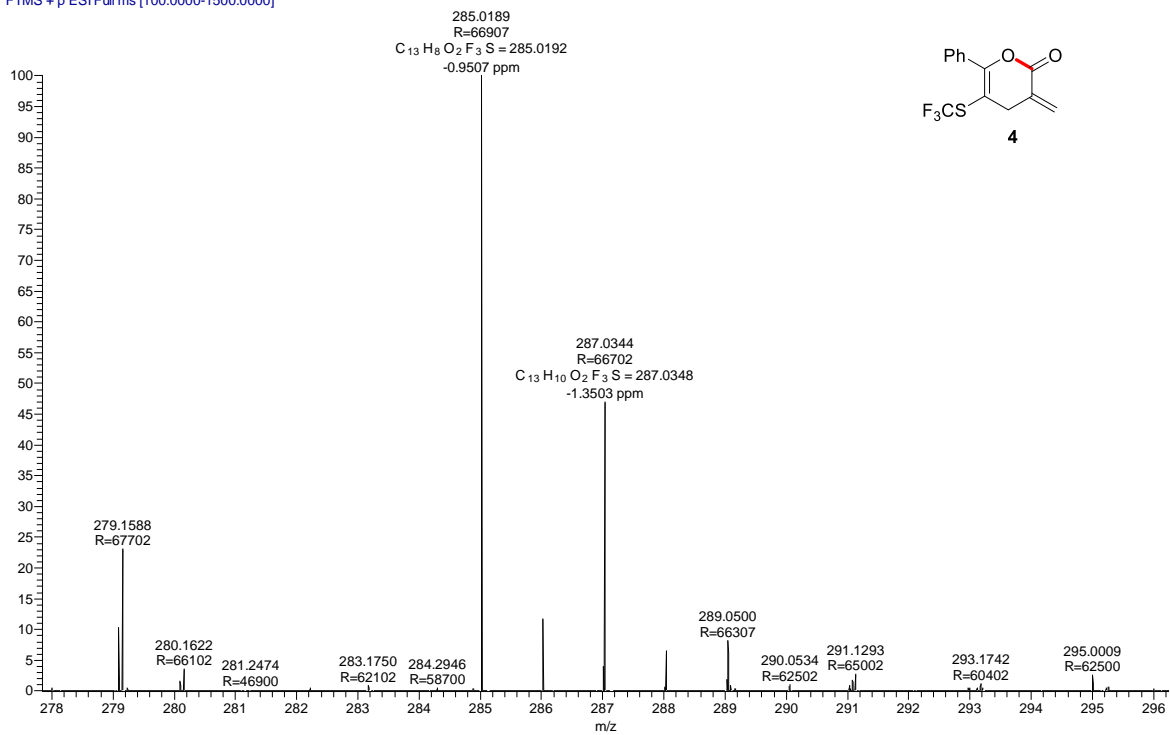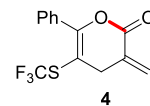



<sup>1</sup>H NMR, 500 MHz

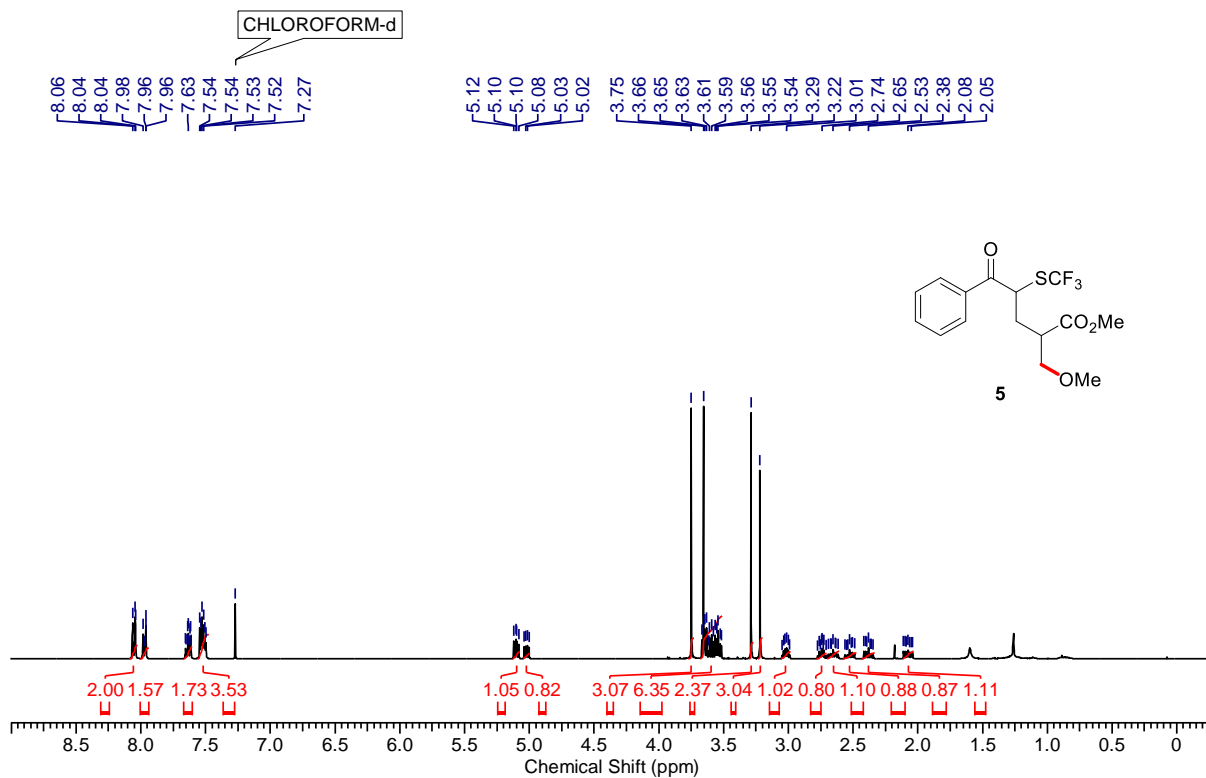

<sup>13</sup>C NMR, 125 MHz

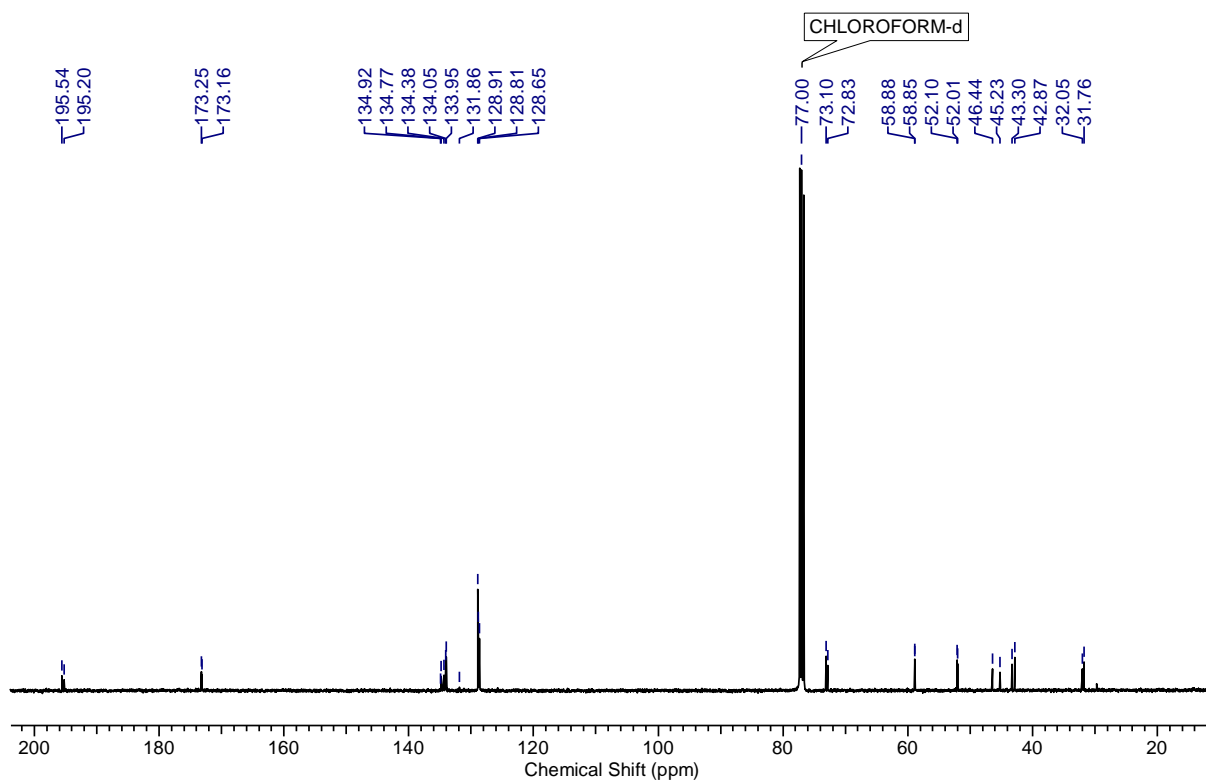

# ESI-HRMS

SeF3-5 #266 RT: 1.60 AV: 1 NL: 6.95E8  
T: FTMS +p ESI Full ms [100.0000-1500.0000]

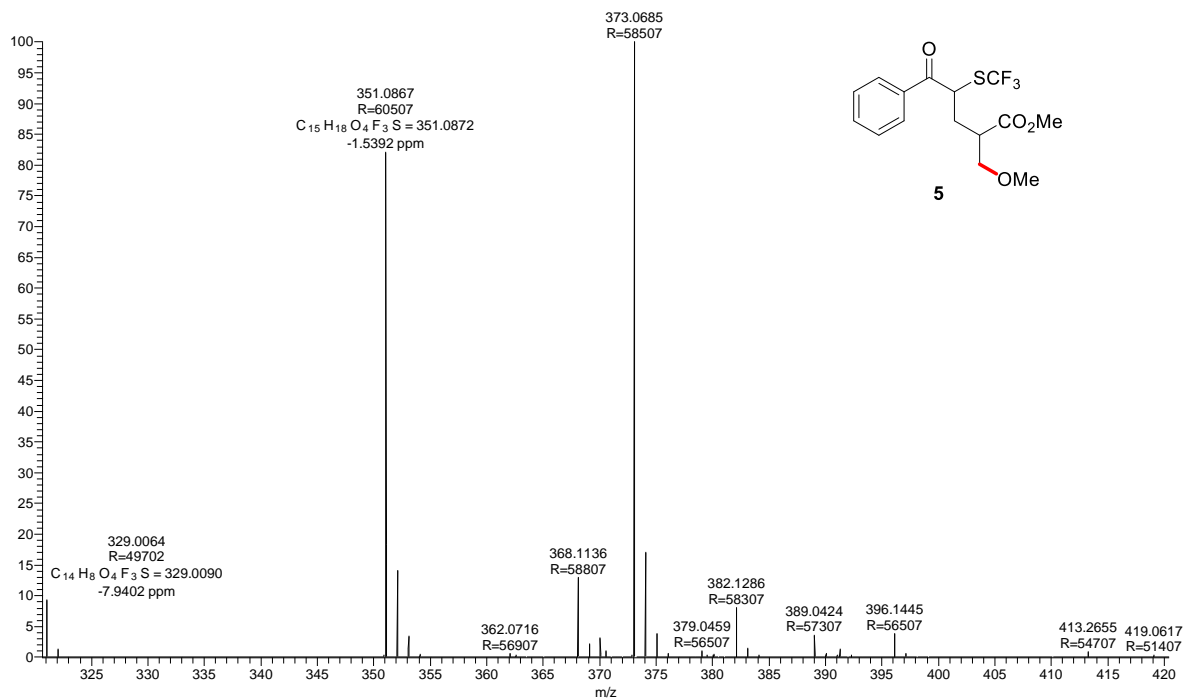

Supplement: d0ob00104j1.pdf [file d0ob00104j1.pdf]
